# Supplementary material for: circMET promotes NSCLC cell proliferation, metastasis, and immune evasion by regulating the miR-145-5p/CXCL3 axis
Source: PubMed Central journal article supplement (PMC7377868; doi:10.18632/aging.103392), 2020-07-02
Supplement: aging-12-103392-s004..pdf [file aging-12-103392-s004..pdf]

# SUPPLEMENTARY DATA

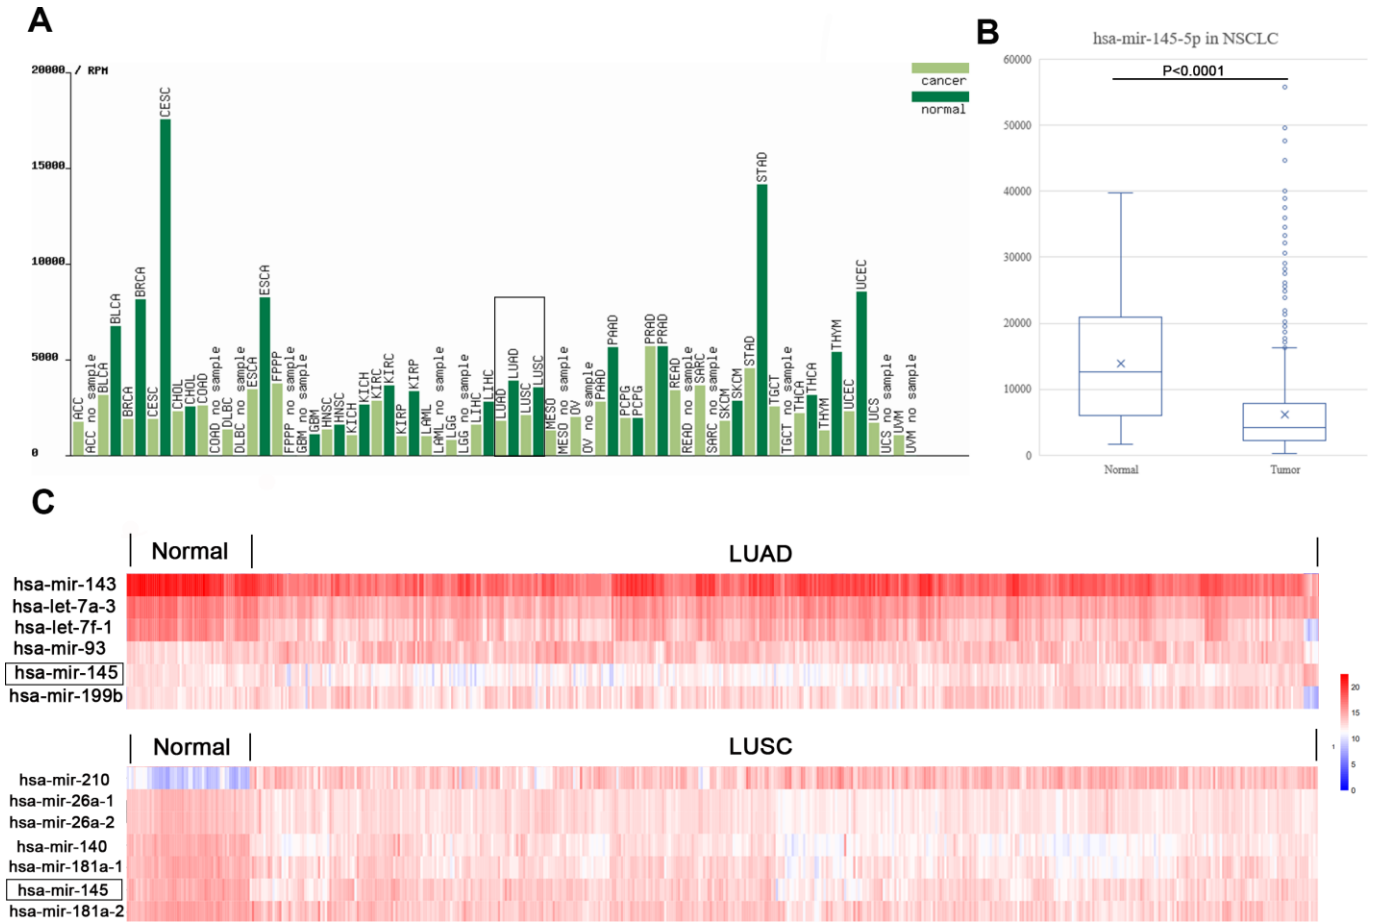

**Supplementary Data 1. The expressions analysis of miR-145-5p in NSCLC from the Cancer Genome Atlas (TCGA) dataset.** (A) The miR-145-5p expression in various types of cancer tissues and adjacent normal tissues from TCGA. (B) The differential expression level of miR-145-5p in NSCLC tissues and adjacent nontumor tissues. (C) The heatmap showed the unequal expression of miR-145-5p in LUAD compared with LUSC in TCGA.

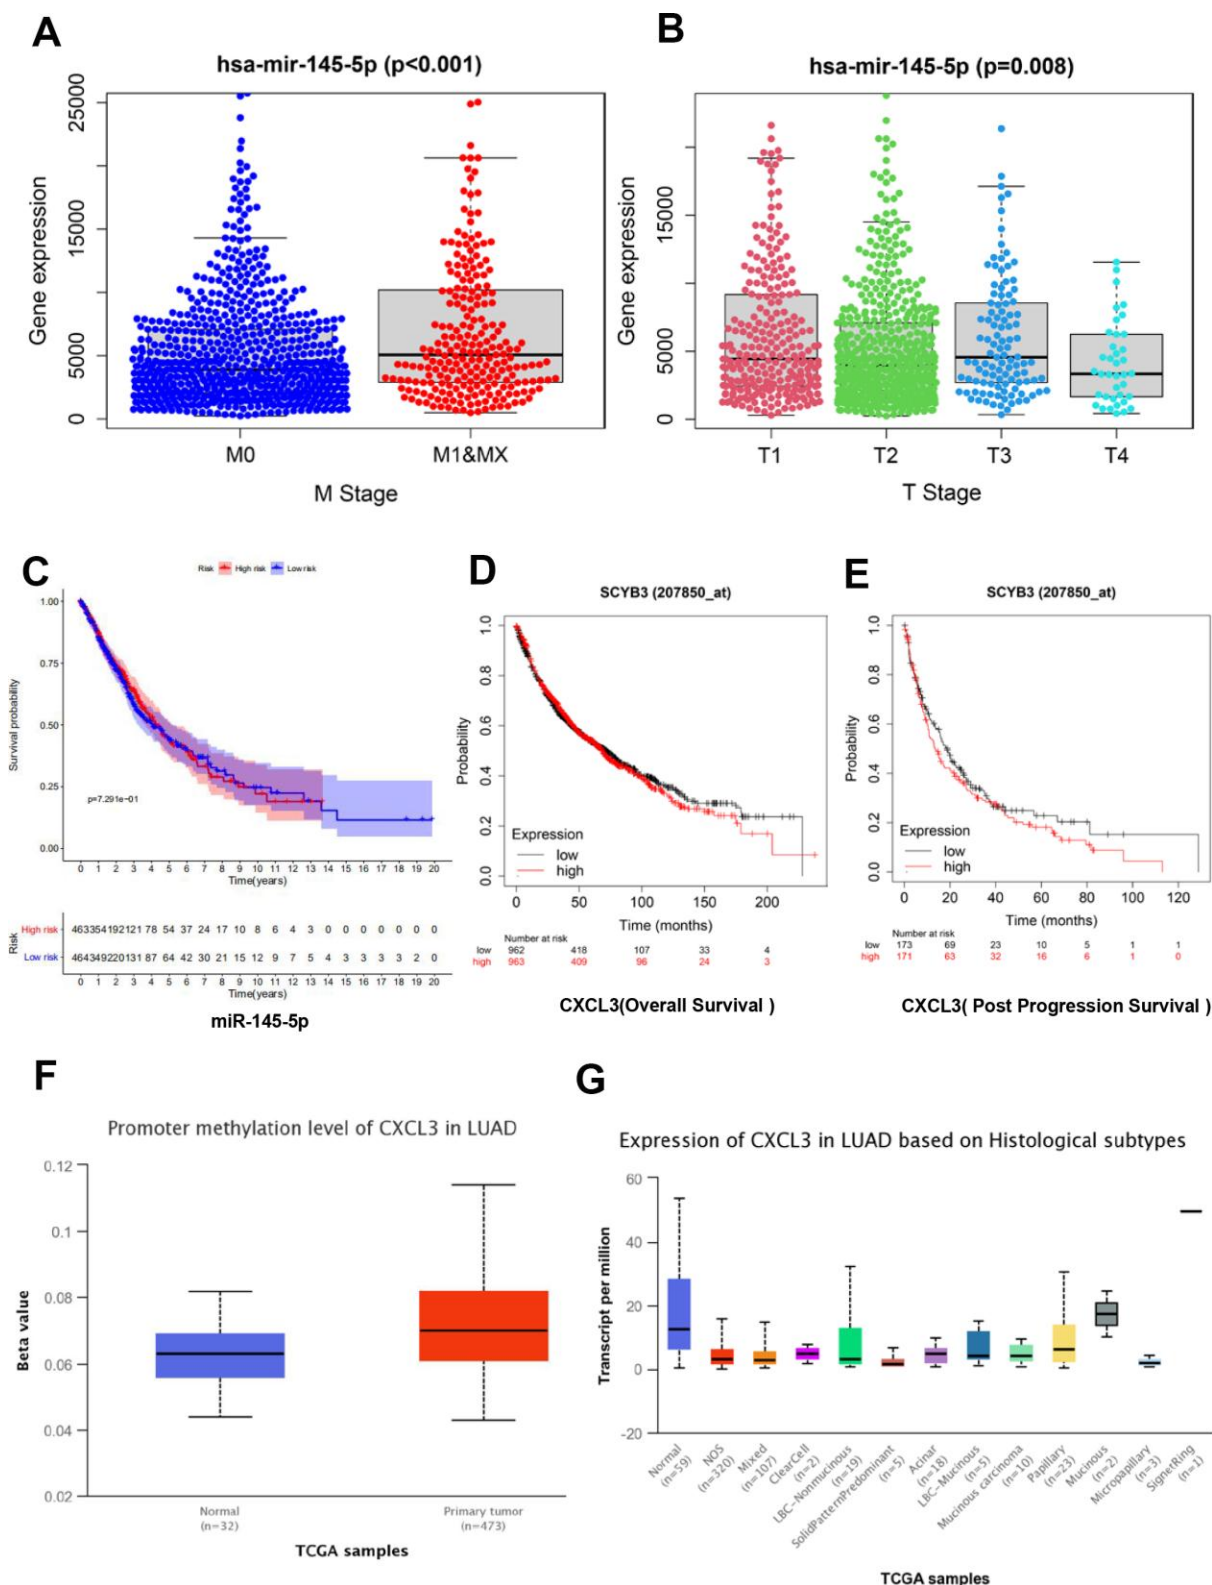

**Supplementary Data 2. The expression of miR-145-5p and CXCL3 in the NSCLC tissues and prognostic significance in TCGA.** (A) Highly hierarchical expression of miR-145-5p in the NSCLC patients with distant metastasis of tumor. (B) A negative correlation between malignant degree of tumor and miR-145-5p expression was observed in TCGA. (C) The survival probability analysis of miR-145-5p expression in TCGA. (D, E) Prognostic analysis of CXCL3 expression in TCGA. (F) The promoter methylation level of CXCL3 with normal and primary tumor. (G) The expression of CXCL3 in LUAD based on histological subtypes in TCGA.
