# Supplementary material for: circMET promotes NSCLC cell proliferation, metastasis, and immune evasion by regulating the miR-145-5p/CXCL3 axis
Source: Aging (Albany NY). 2020 Jul 2;12(13):13038–58. doi: 10.18632/aging.103392 (PMC7377868; doi:10.18632/aging.103392)
Supplement: Supplementary Data 3 [file aging-12-103392-s001..xlsx]

## Sheet: 重要临床表
Supplementary Data 3. miR-145-5p From TCGA database.
id	fustat	age	gender	T	N	M	stage	MIR-145-5p
TCGA-38-4630	1	75	0	2	0	0	1	242	low
TCGA-37-4130	0	56	1	1	0	0	1	297	low
TCGA-85-8352	1	67	1	3	1	0	3	342	low
TCGA-78-7155	1	68	1	2	0	0	1	353	low
TCGA-78-7146	1	71	0	2	2	0	3	369	low
TCGA-05-4415	1	57	1	4	2	0	3	427	low
TCGA-66-2754	0	67	1	2	2	0	3	447	low
TCGA-53-7624	1	40	0	2	0	1	4	496	low
TCGA-55-7995	0	73	0	1	0	0	1	501	low
TCGA-18-3419	0	73	1	2	1	0	2	501	low
TCGA-78-7536	1	69	1	2	2	0	3	516	low
TCGA-78-7158	1	59	0	4	2	0	3	538	low
TCGA-67-3773	0	84	0	2	0	0	1	557	low
TCGA-22-4613	1	73	0	1	0	0	1	560	low
TCGA-55-A494	0	61	0	2	0	1	1	578	low
TCGA-21-5787	1	65	1	2	2	0	3	597	low
TCGA-55-1594	0	68	1	2	2	0	3	649	low
TCGA-33-4532	1	68	1	2	0	0	1	670	low
TCGA-37-3792	0	69	1	2	0	0	1	673	low
TCGA-49-4506	1	68	0	2	1	0	2	681	low
TCGA-18-3416	1	83	1	2	1	0	2	688	low
TCGA-NC-A5HN	0	77	1	2	1	0	2	690	low
TCGA-92-8065	0	74	0	3	0	1	2	696	low
TCGA-55-7725	0	68	0	1	0	1	1	697	low
TCGA-05-4422	0	68	1	2	0	0	1	699	low
TCGA-62-A46U	0	71	0	2	1	0	2	715	low
TCGA-66-2766	0	54	1	2	2	0	3	717	low
TCGA-38-4625	0	66	0	2	0	0	1	722	low
TCGA-86-7713	0	70	1	2	0	0	2	723	low
TCGA-77-8143	1	76	1	2	2	0	3	723	low
TCGA-66-2785	0	65	1	2	0	0	1	738	low
TCGA-05-4395	1	76	1	4	2	0	3	760	low
TCGA-18-3414	1	73	1	4	1	1	4	774	low
TCGA-78-7163	0	60	1	2	0	0	1	784	low
TCGA-22-4601	1	73	0	4	0	0	3	787	low
TCGA-46-3765	0	59	0	1	0	0	1	799	low
TCGA-21-1075	0	57	1	2	1	0	2	806	low
TCGA-33-4566	1	40	1	2	0	0	1	807	low
TCGA-22-5485	1	58	0	1	0	0	1	813	low
TCGA-43-5668	1	78	1	1	1	0	2	815	low
TCGA-44-2662	0	65	1	2	0	0	1	825	low
TCGA-05-4397	1	65	1	2	1	0	2	842	low
TCGA-55-1596	0	55	1	2	1	0	2	843	low
TCGA-55-7903	0	64	1	1	0	1	1	904	low
TCGA-91-6836	0	52	0	2	0	1	1	924	low
TCGA-63-A5MY	0	63	1	1	0	0	1	927	low
TCGA-66-2758	0	71	1	2	0	0	1	953	low
TCGA-37-4135	0	68	1	2	0	0	1	957	low
TCGA-MF-A522	1	54	1	2	0	1	1	961	low
TCGA-60-2714	0	66	0	2	1	0	2	962	low
TCGA-86-8054	0	61	1	2	1	0	2	979	low
TCGA-56-8309	0	66	1	1	0	1	1	993	low
TCGA-46-3768	1	58	1	3	1	0	3	994	low
TCGA-98-A53A	1	70	1	2	0	0	1	995	low
TCGA-66-2742	0	70	1	2	1	1	4	999	low
TCGA-18-3406	1	67	1	1	0	0	1	1019	low
TCGA-O2-A52S	1	57	0	4	2	1	3	1019	low
TCGA-66-2793	1	68	1	4	1	0	3	1023	low
TCGA-60-2716	0	39	1	2	1	0	2	1053	low
TCGA-05-4432	0	66	1	2	1	0	2	1054	low
TCGA-85-6560	0	59	1	1	1	0	2	1072	low
TCGA-33-4538	1	66	1	2	2	0	3	1073	low
TCGA-18-3410	1	81	1	3	0	0	2	1078	low
TCGA-78-7539	0	75	0	2	0	0	2	1085	low
TCGA-18-5595	1	50	1	2	0	0	1	1086	low
TCGA-21-1080	0	66	1	2	0	0	1	1087	low
TCGA-78-7148	1	71	1	2	1	0	2	1102	low
TCGA-58-A46N	0	52	1	2	0	0	1	1125	low
TCGA-44-A479	0	73	0	2	0	1	1	1125	low
TCGA-66-2753	0	69	1	2	0	0	1	1146	low
TCGA-70-6723	0	65	1	3	0	0	2	1161	low
TCGA-78-7542	1	56	1	2	0	0	1	1169	low
TCGA-63-A5MH	0	68	1	1	0	0	1	1173	low
TCGA-78-7537	1	72	1	2	0	0	1	1186	low
TCGA-55-7910	0	50	0	2	0	0	2	1188	low
TCGA-NC-A5HH	0	53	1	1	0	0	1	1195	low
TCGA-05-4389	0	70	1	1	0	0	1	1204	low
TCGA-60-2712	1	79	0	2	1	0	2	1221	low
TCGA-33-4589	1	62	0	2	1	0	2	1223	low
TCGA-66-2727	1	55	0	2	0	0	1	1229	low
TCGA-21-1083	1	75	1	1	0	0	1	1233	low
TCGA-44-A47A	0	78	0	2	0	1	1	1237	low
TCGA-66-2734	0	62	0	2	0	0	1	1257	low
TCGA-55-7911	0	70	0	1	0	1	1	1258	low
TCGA-34-5231	1	72	1	1	0	0	1	1263	low
TCGA-66-2794	0	64	1	4	2	0	3	1275	low
TCGA-56-8083	0	56	1	2	0	1	1	1280	low
TCGA-56-8082	0	80	0	2	0	1	2	1283	low
TCGA-18-5592	0	57	1	3	0	0	2	1286	low
TCGA-05-4249	0	67	1	2	0	0	1	1291	low
TCGA-44-2661	0	69	0	1	0	0	1	1302	low
TCGA-66-2768	0	57	1	2	1	0	2	1309	low
TCGA-60-2719	0	83	0	1	0	0	1	1310	low
TCGA-05-4403	0	76	1	2	0	0	1	1326	low
TCGA-44-3396	0	74	0	2	2	0	3	1327	low
TCGA-55-7994	0	81	1	3	0	1	2	1330	low
TCGA-44-7669	1	59	1	1	1	1	2	1334	low
TCGA-66-2759	0	66	1	2	2	0	3	1348	low
TCGA-44-7670	0	47	0	1	1	0	2	1374	low
TCGA-22-5474	1	74	1	2	0	0	1	1377	low
TCGA-66-2763	0	63	0	2	0	0	1	1385	low
TCGA-55-7913	1	61	0	1	0	1	1	1389	low
TCGA-22-4591	1	80	1	3	2	0	3	1393	low
TCGA-22-1012	1	80	0	2	0	0	1	1397	low
TCGA-37-A5EL	1	53	1	3	0	0	2	1397	low
TCGA-44-2666	1	43	1	2	0	0	1	1401	low
TCGA-NC-A5HL	1	73	1	2	0	0	2	1402	low
TCGA-77-8144	0	70	1	2	0	0	1	1403	low
TCGA-22-5480	1	66	0	1	0	0	1	1420	low
TCGA-33-4533	0	76	0	2	0	0	1	1424	low
TCGA-34-2600	1	76	0	1	0	0	1	1426	low
TCGA-MP-A4TE	1	56	1	2	0	1	2	1436	low
TCGA-66-2787	0	57	1	1	0	0	1	1437	low
TCGA-43-3920	0	71	1	2	0	0	1	1446	low
TCGA-86-7711	1	70	1	2	1	0	2	1447	low
TCGA-62-A471	0	64	1	2	1	0	2	1466	low
TCGA-78-7153	0	65	0	2	0	0	1	1469	low
TCGA-44-6779	1	50	0	2	1	1	2	1469	low
TCGA-60-2724	0	47	1	3	1	0	3	1478	low
TCGA-05-5420	0	67	1	2	2	0	3	1484	low
TCGA-44-7667	0	49	0	3	0	1	2	1487	low
TCGA-44-5643	0	53	1	2	2	0	3	1498	low
TCGA-66-2795	0	68	1	4	1	0	3	1509	low
TCGA-60-2722	0	66	1	2	1	0	2	1529	low
TCGA-50-6591	1	63	0	2	0	1	4	1542	low
TCGA-49-4486	1	72	1	1	0	0	1	1550	low
TCGA-55-7914	1	71	0	1	1	1	2	1550	low
TCGA-66-2791	1	66	1	2	3	0	3	1558	low
TCGA-37-5819	0	64	1	2	2	0	3	1560	low
TCGA-18-3415	1	77	1	2	0	0	1	1566	low
TCGA-60-2723	0	74	0	2	0	0	1	1571	low
TCGA-78-7167	1	77	1	2	0	1	4	1572	low
TCGA-69-7764	0	75	1	1	0	0	1	1584	low
TCGA-44-3918	0	60	0	1	0	0	1	1585	low
TCGA-05-4426	0	71	1	2	0	0	1	1600	low
TCGA-22-0940	1	71	1	1	1	0	2	1606	low
TCGA-18-3408	1	77	0	2	0	0	1	1608	low
TCGA-60-2696	1	76	0	2	0	0	2	1614	low
TCGA-22-4593	1	77	1	2	0	0	2	1626	low
TCGA-55-7727	0	70	1	1	2	1	3	1634	low
TCGA-38-7271	1	72	0	1	0	0	1	1635	low
TCGA-21-1076	0	54	0	2	0	0	1	1657	low
TCGA-53-7813	0	51	0	4	0	0	3	1658	low
TCGA-78-7143	1	62	0	2	0	0	1	1669	low
TCGA-60-2695	0	74	0	2	0	0	1	1672	low
TCGA-64-5775	1	71	1	4	0	0	3	1679	low
TCGA-69-7761	0	84	1	2	0	1	1	1687	low
TCGA-21-1072	0	75	1	2	0	0	1	1703	low
TCGA-33-4586	1	57	1	2	2	0	3	1704	low
TCGA-18-3411	0	63	0	2	2	0	3	1711	low
TCGA-97-7937	0	65	1	2	0	1	1	1713	low
TCGA-97-7554	0	83	0	2	2	0	3	1721	low
TCGA-78-7161	1	69	0	3	0	0	2	1725	low
TCGA-46-3766	0	62	0	1	0	0	1	1734	low
TCGA-05-4420	0	41	1	2	0	0	1	1737	low
TCGA-66-2786	0	68	0	1	0	0	1	1741	low
TCGA-39-5034	1	73	0	3	0	0	2	1744	low
TCGA-05-4418	1	69	1	3	2	0	3	1748	low
TCGA-62-A46O	1	65	0	2	0	0	1	1760	low
TCGA-85-8071	0	52	1	1	1	0	2	1761	low
TCGA-77-A5G6	1	66	1	2	2	0	3	1783	low
TCGA-43-6770	0	59	0	2	0	1	1	1784	low
TCGA-05-4398	0	47	0	4	3	0	3	1792	low
TCGA-22-5491	1	74	1	1	0	0	1	1796	low
TCGA-35-4123	0	38	1	1	0	0	1	1801	low
TCGA-18-3412	1	52	1	2	0	0	1	1804	low
TCGA-37-4133	0	63	1	4	0	0	3	1809	low
TCGA-43-7658	1	75	0	1	0	0	1	1831	low
TCGA-86-7955	0	62	1	2	0	0	1	1831	low
TCGA-96-8169	0	67	0	1	0	0	1	1838	low
TCGA-78-7154	1	72	1	3	2	0	3	1838	low
TCGA-39-5036	0	73	1	2	0	0	1	1847	low
TCGA-33-4583	1	73	1	1	0	0	1	1859	low
TCGA-62-A472	0	70	1	3	0	0	2	1860	low
TCGA-MP-A4SV	1	67	1	2	0	0	1	1863	low
TCGA-55-6642	0	63	1	2	0	1	1	1866	low
TCGA-64-1679	0	58	0	1	2	0	3	1870	low
TCGA-69-A59K	0	60	0	3	0	0	2	1886	low
TCGA-97-8171	0	81	1	2	2	1	4	1886	low
TCGA-64-1677	1	77	0	2	2	0	3	1889	low
TCGA-50-7109	1	60	1	1	0	0	1	1893	low
TCGA-62-8398	1	55	1	2	2	0	3	1896	low
TCGA-55-A491	0	81	0	1	0	1	1	1899	low
TCGA-77-8007	1	68	1	2	1	0	2	1903	low
TCGA-66-2770	0	79	1	2	0	0	1	1910	low
TCGA-62-A46R	1	54	0	2	0	0	1	1914	low
TCGA-97-A4M0	0	60	0	2	0	0	1	1915	low
TCGA-18-4721	0	74	1	1	0	0	1	1926	low
TCGA-56-8307	0	55	0	3	0	0	2	1947	low
TCGA-85-A510	0	74	0	2	1	0	2	1947	low
TCGA-60-2713	0	64	1	2	0	0	1	1955	low
TCGA-38-4632	1	42	1	2	1	1	4	1957	low
TCGA-39-5029	1	67	1	1	2	0	3	1970	low
TCGA-55-7815	0	76	1	2	0	1	1	1980	low
TCGA-L9-A5IP	1	40	0	3	2	1	4	1996	low
TCGA-85-7710	0	59	0	1	0	0	1	2002	low
TCGA-05-4427	0	65	0	2	1	0	2	2010	low
TCGA-L9-A444	0	60	0	1	0	1	1	2015	low
TCGA-86-A4D0	1	48	1	2	0	0	2	2015	low
TCGA-21-1079	1	71	1	3	0	0	3	2016	low
TCGA-66-2782	1	71	1	3	0	0	2	2021	low
TCGA-66-2771	0	60	1	2	1	0	2	2021	low
TCGA-18-4086	1	64	1	2	0	0	1	2032	low
TCGA-71-6725	0	48	0	2	0	0	1	2034	low
TCGA-O2-A5IB	1	71	0	3	1	1	3	2041	low
TCGA-56-1622	1	58	1	2	0	0	1	2065	low
TCGA-60-2721	0	73	1	2	0	0	1	2066	low
TCGA-39-5024	0	65	0	2	2	0	3	2066	low
TCGA-55-7576	0	54	1	2	0	0	1	2073	low
TCGA-49-6745	0	82	1	2	2	0	3	2073	low
TCGA-33-6737	1	71	1	2	2	0	3	2077	low
TCGA-4B-A93V	1	52	0	1	0	0	1	2100	low
TCGA-49-AAR9	1	61	1	3	0	1	2	2109	low
TCGA-90-A59Q	1	61	0	2	1	1	2	2121	low
TCGA-58-A46M	0	61	1	2	1	0	2	2122	low
TCGA-86-8669	0	64	1	1	0	0	1	2126	low
TCGA-66-2792	0	58	1	2	1	0	2	2135	low
TCGA-44-2656	0	59	1	2	0	0	1	2144	low
TCGA-39-5011	0	70	0	1	0	0	1	2147	low
TCGA-64-1680	0	63	1	2	2	1	4	2148	low
TCGA-49-AARE	1	51	0	1	0	1	1	2169	low
TCGA-66-2765	0	64	1	2	0	0	1	2173	low
TCGA-34-5232	0	75	0	1	1	0	2	2177	low
TCGA-67-3771	0	77	0	1	0	0	1	2191	low
TCGA-91-8499	0	76	0	1	0	1	1	2192	low
TCGA-69-8255	0	71	1	1	0	0	1	2219	low
TCGA-46-3767	0	76	1	1	0	0	1	2226	low
TCGA-34-5927	0	70	0	1	0	0	1	2228	low
TCGA-43-2581	0	47	0	3	1	0	3	2238	low
TCGA-95-7944	0	71	1	1	0	0	1	2246	low
TCGA-39-5021	1	70	1	2	0	0	1	2252	low
TCGA-60-2711	0	64	0	2	0	0	1	2265	low
TCGA-55-A490	1	78	1	2	0	1	2	2267	low
TCGA-62-8402	1	73	0	2	2	0	3	2273	low
TCGA-18-3421	0	65	1	2	0	0	1	2275	low
TCGA-44-2659	0	65	0	1	1	0	2	2279	low
TCGA-22-0944	1	61	1	2	0	0	1	2294	low
TCGA-78-7535	1	45	1	2	0	0	1	2301	low
TCGA-33-4582	1	55	1	1	0	0	1	2309	low
TCGA-66-2755	0	63	1	2	0	0	1	2309	low
TCGA-22-5471	0	75	1	2	0	0	1	2316	low
TCGA-22-1011	1	73	1	2	0	0	1	2332	low
TCGA-56-7823	0	58	0	1	1	0	2	2333	low
TCGA-78-7145	1	52	0	4	1	1	4	2336	low
TCGA-86-7714	1	61	0	1	2	0	3	2350	low
TCGA-56-8629	0	63	1	2	0	1	2	2356	low
TCGA-21-1078	1	77	1	2	0	0	1	2363	low
TCGA-56-8308	0	79	1	3	0	1	2	2384	low
TCGA-05-4433	0	82	1	2	0	0	1	2389	low
TCGA-44-6778	0	59	1	1	0	1	1	2397	low
TCGA-77-8153	0	77	0	2	0	0	1	2408	low
TCGA-63-A5MJ	0	54	1	2	1	0	2	2412	low
TCGA-60-2710	0	67	0	1	1	0	2	2413	low
TCGA-05-4382	0	68	1	2	0	0	1	2426	low
TCGA-55-7570	0	60	1	1	0	1	1	2426	low
TCGA-85-8479	0	66	1	1	0	0	1	2436	low
TCGA-91-6828	0	70	1	1	0	0	1	2499	low
TCGA-MP-A4T6	1	76	0	1	2	1	3	2502	low
TCGA-55-8094	0	51	1	2	0	1	4	2514	low
TCGA-91-6835	0	81	0	1	0	0	1	2518	low
TCGA-95-7567	0	61	1	2	1	0	2	2523	low
TCGA-L4-A4E5	0	48	0	1	0	0	1	2530	low
TCGA-64-5774	0	60	1	2	0	0	1	2531	low
TCGA-NC-A5HM	0	76	1	2	0	0	1	2541	low
TCGA-49-6743	0	81	0	1	2	1	3	2549	low
TCGA-73-4659	1	66	1	2	2	0	3	2552	low
TCGA-78-7149	0	71	1	4	0	0	3	2571	low
TCGA-44-7672	0	52	0	1	0	0	1	2577	low
TCGA-78-7166	1	84	1	2	1	0	2	2587	low
TCGA-NK-A5CT	0	70	1	1	0	0	1	2592	low
TCGA-97-8176	1	63	1	3	1	0	3	2596	low
TCGA-38-4629	1	68	1	3	0	0	2	2601	low
TCGA-85-A4CL	1	65	1	1	0	0	1	2605	low
TCGA-46-6025	0	71	1	2	1	0	2	2614	low
TCGA-86-7701	0	66	1	2	0	1	4	2626	low
TCGA-49-4487	1	72	0	1	0	0	1	2640	low
TCGA-44-7659	0	70	1	1	0	1	1	2650	low
TCGA-55-8091	0	74	1	2	0	1	1	2650	low
TCGA-NC-A5HG	0	59	1	2	2	0	3	2656	low
TCGA-50-6590	1	72	0	2	0	0	1	2668	low
TCGA-NK-A5D1	0	57	1	2	1	0	2	2670	low
TCGA-55-1592	1	65	1	2	0	0	1	2684	low
TCGA-78-7162	1	75	1	1	0	0	1	2688	low
TCGA-44-2668	1	51	1	2	0	0	1	2697	low
TCGA-22-4594	1	60	0	3	2	0	3	2697	low
TCGA-L9-A7SV	0	69	1	2	1	0	2	2710	low
TCGA-MP-A4SW	1	53	1	2	1	0	2	2711	low
TCGA-77-8150	1	64	1	3	1	0	3	2719	low
TCGA-63-A5ML	0	68	1	2	0	0	1	2728	low
TCGA-96-8170	0	75	0	1	1	0	2	2750	low
TCGA-78-7150	1	59	1	2	1	0	2	2755	low
TCGA-66-2781	0	67	1	2	0	0	1	2768	low
TCGA-86-A456	0	78	0	1	0	0	1	2778	low
TCGA-55-8506	0	62	0	3	0	1	2	2787	low
TCGA-56-6545	0	77	0	2	0	0	1	2794	low
TCGA-86-7953	0	69	0	1	0	0	1	2797	low
TCGA-85-8354	0	53	1	2	0	0	1	2797	low
TCGA-85-A50Z	0	57	1	2	0	0	2	2798	low
TCGA-94-8490	0	70	1	3	0	0	2	2805	low
TCGA-97-7553	0	58	0	1	0	1	1	2816	low
TCGA-66-2744	0	71	1	2	1	0	2	2830	low
TCGA-78-7220	1	53	0	2	2	0	3	2835	low
TCGA-58-8387	1	60	1	2	0	0	2	2844	low
TCGA-85-A4QR	0	67	1	2	0	0	1	2845	low
TCGA-37-4141	0	65	0	1	0	0	1	2851	low
TCGA-97-7938	1	76	0	1	0	1	1	2856	low
TCGA-60-2698	1	62	1	2	1	0	2	2857	low
TCGA-55-7573	0	72	0	1	0	1	1	2864	low
TCGA-55-6712	1	71	1	2	1	1	2	2870	low
TCGA-69-7763	0	69	1	1	0	0	1	2876	low
TCGA-34-5241	1	79	1	2	0	0	1	2876	low
TCGA-05-5428	0	57	1	1	1	0	2	2881	low
TCGA-73-4675	1	59	1	3	1	0	3	2882	low
TCGA-58-8391	0	57	0	2	2	0	3	2898	low
TCGA-05-4390	0	58	0	2	0	0	1	2915	low
TCGA-49-AARQ	0	41	0	2	0	1	1	2918	low
TCGA-49-6767	0	46	0	3	0	1	2	2934	low
TCGA-49-4507	1	73	0	3	1	0	3	2952	low
TCGA-55-8615	0	67	1	3	2	1	3	2955	low
TCGA-L9-A50W	1	75	1	1	1	1	2	2975	low
TCGA-90-A4EE	0	53	1	2	1	1	2	2980	low
TCGA-53-7626	1	76	0	1	1	0	2	3007	low
TCGA-56-7730	1	73	1	2	0	0	2	3008	low
TCGA-55-A48Y	0	69	1	2	0	0	2	3011	low
TCGA-77-8154	0	67	1	1	0	0	1	3016	low
TCGA-73-A9RS	1	41	1	3	0	0	2	3017	low
TCGA-78-7152	1	65	1	2	0	0	1	3020	low
TCGA-78-7540	1	66	0	2	0	0	1	3036	low
TCGA-NK-A5CR	0	77	1	2	0	1	1	3040	low
TCGA-43-6771	1	85	1	2	0	1	1	3042	low
TCGA-21-1077	1	64	1	2	1	0	2	3048	low
TCGA-60-2725	0	74	1	2	0	0	1	3052	low
TCGA-05-4244	0	70	1	2	2	1	4	3053	low
TCGA-90-7769	0	55	1	2	1	1	2	3069	low
TCGA-18-3417	1	65	1	2	1	1	4	3078	low
TCGA-63-A5MI	0	65	1	2	2	0	3	3080	low
TCGA-O2-A52Q	1	44	0	3	1	1	3	3085	low
TCGA-MP-A4T2	1	71	1	1	0	0	1	3088	low
TCGA-22-5478	1	79	1	2	0	0	1	3091	low
TCGA-67-6215	0	52	0	2	0	0	1	3095	low
TCGA-34-2609	1	81	1	2	1	0	2	3098	low
TCGA-66-2789	1	73	1	1	3	0	3	3098	low
TCGA-78-7147	1	67	0	2	1	0	2	3100	low
TCGA-34-5240	0	73	0	2	1	0	2	3102	low
TCGA-60-2706	0	58	1	1	0	0	1	3104	low
TCGA-58-8393	0	68	0	2	0	0	1	3105	low
TCGA-85-8351	0	72	1	2	1	0	2	3115	low
TCGA-66-2767	0	62	1	2	3	0	3	3128	low
TCGA-55-8090	1	80	1	1	0	0	1	3134	low
TCGA-77-8009	1	68	1	2	1	0	2	3151	low
TCGA-86-6851	0	73	0	1	1	0	2	3168	low
TCGA-21-5786	0	64	1	2	0	0	1	3175	low
TCGA-55-7907	1	77	1	2	1	1	2	3177	low
TCGA-50-5044	1	72	0	4	1	0	3	3187	low
TCGA-55-A493	0	54	0	2	0	0	1	3190	low
TCGA-56-A4ZK	0	76	0	2	0	0	1	3194	low
TCGA-97-7547	0	67	0	2	0	1	1	3195	low
TCGA-78-8640	0	59	1	1	1	0	2	3201	low
TCGA-NJ-A4YI	1	87	0	2	2	0	3	3201	low
TCGA-67-3774	0	73	0	2	0	0	1	3215	low
TCGA-86-7954	0	68	0	2	0	0	1	3219	low
TCGA-MP-A4T4	1	68	0	2	1	0	2	3220	low
TCGA-77-8156	0	60	1	2	0	0	1	3223	low
TCGA-90-7766	0	66	0	1	0	1	1	3240	low
TCGA-85-A4JB	0	74	1	3	0	0	2	3240	low
TCGA-44-6776	0	60	0	1	0	1	1	3248	low
TCGA-39-5037	0	65	1	1	1	0	2	3248	low
TCGA-85-7843	0	50	1	2	1	0	2	3270	low
TCGA-99-7458	0	74	0	4	0	0	3	3287	low
TCGA-78-7160	1	61	1	4	2	1	4	3293	low
TCGA-55-7574	1	64	0	2	0	0	1	3299	low
TCGA-05-4424	0	70	1	3	0	0	2	3304	low
TCGA-64-5815	0	74	1	2	1	0	2	3321	low
TCGA-78-7156	1	62	1	4	1	1	4	3324	low
TCGA-66-2777	0	71	1	2	0	0	1	3333	low
TCGA-60-2708	0	64	0	2	1	0	2	3334	low
TCGA-J2-8194	0	69	0	3	0	1	2	3337	low
TCGA-38-4628	1	65	0	2	1	0	2	3342	low
TCGA-39-5031	1	76	0	1	0	0	1	3360	low
TCGA-34-2605	1	76	1	4	1	0	3	3362	low
TCGA-MP-A4T7	1	75	0	2	0	1	4	3364	low
TCGA-69-7760	0	73	1	3	0	0	2	3373	low
TCGA-39-5030	1	81	0	2	2	0	3	3386	low
TCGA-66-2788	0	56	1	2	0	0	1	3400	low
TCGA-22-4607	1	75	1	2	0	0	1	3402	low
TCGA-66-2780	1	65	1	2	0	0	1	3435	low
TCGA-92-8063	0	52	1	2	2	1	3	3437	low
TCGA-55-7227	1	77	1	3	1	1	3	3439	low
TCGA-85-8276	0	62	1	1	1	0	2	3448	low
TCGA-22-5477	1	65	1	1	0	0	1	3453	low
TCGA-66-2790	0	72	1	2	1	0	2	3454	low
TCGA-55-8207	0	73	1	2	0	1	1	3455	low
TCGA-MP-A4TF	1	58	0	2	0	0	2	3468	low
TCGA-43-6143	0	70	1	2	0	0	1	3478	low
TCGA-97-A4LX	0	81	1	2	0	0	1	3485	low
TCGA-22-5472	1	67	1	2	0	0	1	3487	low
TCGA-NC-A5HR	0	75	0	2	1	0	2	3508	low
TCGA-73-4662	0	65	0	1	0	0	1	3515	low
TCGA-39-5028	1	75	1	4	1	0	3	3526	low
TCGA-44-6145	0	62	0	1	0	0	1	3538	low
TCGA-51-4081	0	55	1	2	1	0	2	3562	low
TCGA-44-7671	0	64	1	2	0	0	1	3600	low
TCGA-50-6597	1	79	0	2	0	0	1	3609	low
TCGA-34-2604	1	81	0	2	0	0	1	3613	low
TCGA-77-6845	1	69	1	3	0	0	2	3617	low
TCGA-50-5939	1	85	1	2	0	0	1	3620	low
TCGA-94-7557	1	73	1	2	0	0	1	3629	low
TCGA-77-7465	0	58	1	2	1	0	2	3632	low
TCGA-50-8460	0	74	1	1	0	0	1	3680	low
TCGA-86-8359	1	52	1	3	2	0	3	3681	low
TCGA-33-A5GW	0	67	1	1	1	1	2	3694	low
TCGA-99-8028	0	50	0	1	0	0	1	3698	low
TCGA-77-A5GF	1	70	1	2	1	0	2	3706	low
TCGA-LA-A446	0	68	1	1	0	1	1	3709	low
TCGA-56-7582	0	83	1	2	0	0	1	3716	low
TCGA-67-6216	0	57	0	1	0	0	1	3725	low
TCGA-85-8072	0	60	1	1	0	0	1	3744	low
TCGA-43-8118	1	55	0	1	0	0	1	3753	low
TCGA-50-5936	1	58	1	2	2	0	3	3759	low
TCGA-22-5482	1	81	1	2	0	0	1	3778	low
TCGA-34-8456	0	71	0	2	1	0	2	3784	low
TCGA-50-6594	1	79	0	3	2	0	3	3802	low
TCGA-44-2665	0	55	0	2	1	0	2	3803	low
TCGA-77-8140	1	66	0	2	1	0	2	3805	low
TCGA-49-6742	1	70	1	2	1	0	2	3809	low
TCGA-44-7660	0	72	1	2	0	1	1	3819	low
TCGA-49-6744	0	64	0	2	1	1	2	3823	low
TCGA-62-A46V	0	78	0	2	0	0	1	3847	low
TCGA-91-A4BD	0	78	1	1	1	1	2	3848	low
TCGA-55-8092	1	75	1	3	0	1	2	3854	low
TCGA-NJ-A4YP	0	52	1	2	0	0	1	3855	low
TCGA-50-5051	1	42	0	2	2	0	3	3865	low
TCGA-69-7973	0	42	0	2	0	0	1	3878	low
TCGA-34-5929	1	78	0	2	0	0	1	3897	low
TCGA-MN-A4N5	0	63	1	1	0	0	1	3900	low
TCGA-66-2737	0	72	1	2	1	0	2	3901	low
TCGA-77-A5G7	1	63	1	1	0	0	1	3917	low
TCGA-55-7724	0	76	0	2	0	1	1	3917	low
TCGA-05-5715	0	69	0	2	0	0	1	3945	low
TCGA-78-8662	1	53	0	2	0	0	1	3958	low
TCGA-22-A5C4	0	70	1	2	0	0	2	3958	low
TCGA-NC-A5HD	1	79	1	3	0	0	2	3964	low
TCGA-55-8620	1	60	1	1	1	1	4	3970	low
TCGA-44-4112	1	60	0	2	0	0	1	3976	low
TCGA-38-4627	1	64	0	1	1	0	2	3986	low
TCGA-43-8116	0	73	1	1	0	0	1	3991	low
TCGA-33-4547	0	68	1	2	0	0	1	4011	low
TCGA-33-AASL	1	57	0	1	0	1	1	4011	low
TCGA-62-A46P	1	65	1	2	0	0	1	4020	low
TCGA-91-6847	0	62	0	2	0	1	1	4046	low
TCGA-77-8146	0	72	1	1	0	0	1	4053	low
TCGA-44-7661	1	69	0	2	0	0	1	4078	low
TCGA-56-8504	0	74	1	2	0	1	1	4082	low
TCGA-05-5425	0	68	1	2	1	0	2	4086	low
TCGA-49-4494	1	77	1	3	2	0	3	4092	low
TCGA-93-7348	0	75	0	1	0	1	1	4096	low
TCGA-56-7223	1	66	1	3	1	1	3	4104	low
TCGA-55-A48Z	0	60	0	1	3	1	3	4121	low
TCGA-43-2578	0	59	0	1	0	0	1	4124	low
TCGA-85-7699	1	73	1	4	0	0	3	4127	low
TCGA-34-8454	0	62	0	3	1	0	3	4142	low
TCGA-22-5492	1	73	0	2	2	0	3	4167	low
TCGA-91-7771	0	62	1	3	0	1	2	4168	low
TCGA-NJ-A4YQ	0	69	0	1	0	0	1	4180	low
TCGA-97-8175	0	55	0	2	0	0	1	4184	high
TCGA-NC-A5HO	0	70	0	3	1	0	3	4188	high
TCGA-05-4405	0	74	0	2	0	0	1	4200	high
TCGA-64-1676	0	58	1	1	0	0	1	4222	high
TCGA-O1-A52J	1	74	0	1	0	1	1	4222	high
TCGA-98-A53J	0	77	1	2	0	0	1	4223	high
TCGA-50-6595	1	74	0	2	2	0	3	4223	high
TCGA-56-8201	1	74	1	3	0	1	2	4228	high
TCGA-J2-A4AE	0	77	0	1	0	1	1	4257	high
TCGA-MP-A4T8	1	68	1	2	2	0	3	4267	high
TCGA-33-4587	1	63	0	2	0	1	1	4275	high
TCGA-22-5483	1	74	1	1	1	0	2	4282	high
TCGA-35-5375	0	61	1	2	2	0	3	4291	high
TCGA-97-7546	0	76	0	1	0	1	1	4292	high
TCGA-85-8666	1	65	1	2	0	0	1	4295	high
TCGA-44-A47B	0	79	1	2	0	0	1	4297	high
TCGA-58-8388	1	60	1	2	0	0	1	4303	high
TCGA-55-A4DF	1	88	1	1	0	1	1	4315	high
TCGA-50-5942	0	67	0	1	0	0	1	4343	high
TCGA-55-7283	0	76	0	3	2	1	3	4352	high
TCGA-66-2800	0	70	1	4	0	0	3	4354	high
TCGA-94-A5I4	0	61	1	2	1	1	2	4356	high
TCGA-55-8089	1	56	1	1	0	0	1	4395	high
TCGA-95-7947	0	67	1	1	0	0	1	4395	high
TCGA-66-2783	0	67	1	2	3	0	3	4406	high
TCGA-85-8664	1	73	1	2	1	0	2	4407	high
TCGA-49-4510	1	51	0	2	1	0	2	4419	high
TCGA-50-5941	0	55	0	2	2	0	3	4421	high
TCGA-39-5039	1	76	1	2	0	0	2	4427	high
TCGA-05-4430	0	59	0	2	0	0	1	4433	high
TCGA-39-5035	0	72	0	1	0	0	1	4436	high
TCGA-22-4604	1	73	1	2	1	0	2	4438	high
TCGA-55-8205	0	76	0	2	0	0	2	4444	high
TCGA-93-A4JO	1	70	1	1	0	1	1	4452	high
TCGA-NC-A5HE	0	60	1	2	1	0	2	4459	high
TCGA-37-A5EN	0	59	1	4	2	0	3	4463	high
TCGA-NC-A5HI	0	68	0	2	0	0	1	4487	high
TCGA-53-A4EZ	0	63	1	2	1	1	2	4489	high
TCGA-85-7950	0	46	1	2	0	0	1	4490	high
TCGA-97-7552	0	70	1	2	0	1	1	4497	high
TCGA-58-8392	1	70	1	2	0	0	1	4499	high
TCGA-62-A46Y	1	70	0	2	2	0	3	4506	high
TCGA-77-7142	0	59	0	2	0	0	1	4511	high
TCGA-L9-A8F4	0	64	0	2	0	1	1	4513	high
TCGA-85-8584	1	71	1	2	1	0	2	4516	high
TCGA-56-7222	1	60	1	2	0	0	1	4535	high
TCGA-77-A5G3	0	63	1	2	1	0	2	4551	high
TCGA-34-A5IX	0	80	1	3	0	0	2	4558	high
TCGA-NC-A5HF	1	74	1	4	0	1	3	4559	high
TCGA-58-8390	0	70	1	2	0	0	2	4573	high
TCGA-35-3615	0	57	1	2	0	0	1	4576	high
TCGA-NC-A5HQ	1	70	1	3	2	0	3	4577	high
TCGA-62-8399	0	62	1	2	2	0	3	4586	high
TCGA-63-A5MP	0	56	1	2	1	0	2	4587	high
TCGA-NJ-A4YF	0	50	0	1	0	0	1	4633	high
TCGA-78-7633	1	67	1	2	0	0	1	4647	high
TCGA-55-1595	0	74	0	1	0	0	1	4653	high
TCGA-93-8067	0	77	1	2	0	1	1	4654	high
TCGA-L4-A4E6	0	67	1	1	0	0	1	4657	high
TCGA-85-8355	0	63	1	1	0	0	1	4670	high
TCGA-56-A4BX	0	70	1	2	0	1	2	4675	high
TCGA-67-3772	0	82	0	2	0	0	1	4697	high
TCGA-95-A4VN	0	62	0	2	1	0	2	4709	high
TCGA-37-3783	0	51	1	3	2	0	3	4726	high
TCGA-51-6867	1	72	0	1	0	0	1	4728	high
TCGA-95-7948	0	42	0	2	0	0	1	4739	high
TCGA-33-A4WN	1	60	1	2	0	1	1	4740	high
TCGA-55-7281	0	70	0	1	0	0	1	4743	high
TCGA-49-AAR2	0	64	1	2	0	1	1	4786	high
TCGA-85-8287	1	72	1	1	0	0	1	4787	high
TCGA-68-7755	0	60	0	1	1	0	2	4820	high
TCGA-50-5933	1	72	1	4	2	0	3	4828	high
TCGA-77-7139	0	56	1	2	1	0	2	4835	high
TCGA-44-7662	0	61	1	2	0	1	1	4846	high
TCGA-43-A475	0	67	0	3	0	0	2	4856	high
TCGA-73-4676	1	45	1	2	1	0	2	4879	high
TCGA-55-8511	0	73	0	2	0	1	1	4895	high
TCGA-38-4631	1	72	0	2	0	0	1	4897	high
TCGA-60-2703	1	73	1	2	1	0	2	4957	high
TCGA-56-A5DR	0	81	1	1	0	1	1	4967	high
TCGA-77-7140	1	69	0	2	1	0	2	4978	high
TCGA-69-7974	0	54	0	2	2	1	3	5001	high
TCGA-37-A5EM	0	49	1	2	0	0	2	5005	high
TCGA-44-3398	0	77	0	1	0	0	1	5052	high
TCGA-43-2576	0	62	0	2	2	0	3	5061	high
TCGA-55-A4DG	0	71	1	1	0	1	1	5069	high
TCGA-05-4417	0	51	0	2	0	0	1	5114	high
TCGA-39-5040	1	59	1	2	2	0	3	5122	high
TCGA-34-8455	1	67	1	4	0	1	4	5129	high
TCGA-49-4505	1	61	0	2	1	0	2	5135	high
TCGA-63-A5MW	0	76	1	2	0	0	1	5149	high
TCGA-85-A512	0	46	1	1	1	0	2	5170	high
TCGA-50-6592	1	71	0	2	0	0	1	5182	high
TCGA-52-7809	1	74	1	2	0	0	1	5186	high
TCGA-86-A4JF	1	56	1	3	0	0	2	5205	high
TCGA-56-8304	0	73	0	1	0	1	1	5259	high
TCGA-50-5049	0	70	1	2	0	0	1	5275	high
TCGA-62-A470	1	84	1	2	0	0	1	5277	high
TCGA-50-5068	1	59	0	2	1	1	2	5279	high
TCGA-05-4410	0	62	1	2	0	0	1	5282	high
TCGA-98-A538	0	67	1	3	0	0	2	5285	high
TCGA-43-5670	0	70	1	2	0	0	2	5300	high
TCGA-56-5897	0	74	1	1	0	1	1	5302	high
TCGA-MP-A4TJ	1	62	0	1	0	0	1	5303	high
TCGA-55-8203	0	69	0	1	0	0	1	5315	high
TCGA-05-4434	1	67	0	4	1	1	4	5330	high
TCGA-55-8085	0	64	1	1	0	0	1	5352	high
TCGA-78-8655	0	77	0	1	0	0	1	5371	high
TCGA-L9-A443	1	63	0	1	0	1	1	5381	high
TCGA-49-4514	0	79	0	1	0	0	1	5384	high
TCGA-35-4122	0	69	1	1	0	0	1	5409	high
TCGA-J2-A4AG	0	66	0	1	0	1	1	5429	high
TCGA-55-8508	0	60	0	2	1	1	2	5447	high
TCGA-95-7562	1	71	1	2	1	0	2	5458	high
TCGA-98-A53I	0	64	1	2	1	0	2	5476	high
TCGA-22-4596	1	69	0	1	0	0	1	5481	high
TCGA-94-8491	0	73	1	2	1	0	2	5499	high
TCGA-97-8547	0	78	0	2	2	1	3	5503	high
TCGA-44-8117	0	54	0	2	0	0	1	5509	high
TCGA-96-7544	1	83	1	2	1	1	2	5514	high
TCGA-62-8397	0	70	0	3	0	0	2	5517	high
TCGA-86-8278	0	63	0	2	1	0	2	5524	high
TCGA-44-6775	0	72	0	2	0	1	1	5541	high
TCGA-85-8580	0	52	0	2	0	0	1	5561	high
TCGA-85-A4CN	0	56	0	2	1	0	2	5579	high
TCGA-62-A46S	1	73	1	2	0	0	1	5598	high
TCGA-97-A4M2	0	66	1	1	0	0	1	5600	high
TCGA-50-5066	0	72	1	2	0	0	1	5626	high
TCGA-05-5423	0	65	1	2	1	0	2	5632	high
TCGA-93-A4JQ	0	49	1	1	0	1	1	5652	high
TCGA-39-5027	0	73	1	2	0	0	1	5658	high
TCGA-91-6831	0	66	1	2	0	1	1	5691	high
TCGA-68-A59I	0	73	0	3	1	0	3	5744	high
TCGA-78-8660	1	69	1	2	1	0	2	5749	high
TCGA-55-8514	0	70	0	2	0	1	1	5760	high
TCGA-46-6026	0	81	1	2	1	0	2	5786	high
TCGA-86-8279	0	46	1	2	1	0	2	5788	high
TCGA-98-7454	0	73	1	2	0	0	1	5823	high
TCGA-21-5783	1	76	1	2	0	0	1	5835	high
TCGA-MN-A4N4	0	57	1	1	0	0	1	5843	high
TCGA-69-7978	0	59	1	2	1	1	2	5849	high
TCGA-05-4250	1	79	0	3	1	0	3	5856	high
TCGA-85-8353	1	72	1	3	1	0	3	5865	high
TCGA-33-AASD	1	83	1	1	0	1	1	5876	high
TCGA-O2-A52N	1	78	1	2	0	1	1	5893	high
TCGA-44-3919	1	71	0	1	0	0	1	5904	high
TCGA-NC-A5HK	0	58	0	3	0	0	2	5956	high
TCGA-68-A59J	0	74	0	2	0	1	1	5971	high
TCGA-94-A5I6	0	62	1	3	0	0	2	5974	high
TCGA-49-4512	1	69	0	2	2	1	3	5974	high
TCGA-56-A49D	0	67	1	2	2	1	3	6010	high
TCGA-34-2608	1	84	1	2	0	0	1	6014	high
TCGA-58-A46K	1	59	1	2	2	0	3	6017	high
TCGA-64-1681	1	61	0	1	0	0	1	6044	high
TCGA-91-A4BC	0	59	1	2	0	1	2	6064	high
TCGA-71-8520	1	60	0	2	0	0	1	6118	high
TCGA-55-8616	0	58	0	2	0	0	1	6127	high
TCGA-91-6829	1	78	1	2	0	1	1	6131	high
TCGA-63-A5MN	1	78	0	3	0	0	2	6164	high
TCGA-55-8208	0	73	0	1	0	0	1	6178	high
TCGA-55-A48X	0	63	0	1	1	0	2	6183	high
TCGA-86-8358	0	44	1	2	0	0	1	6207	high
TCGA-85-A4PA	0	61	1	2	0	0	1	6221	high
TCGA-85-8070	0	71	1	2	0	0	1	6231	high
TCGA-05-4396	1	76	1	4	1	0	3	6249	high
TCGA-86-8056	0	63	0	4	0	0	3	6255	high
TCGA-56-A4BW	0	55	1	2	1	0	2	6283	high
TCGA-18-3407	1	72	1	2	0	0	1	6289	high
TCGA-85-8582	0	49	1	1	0	0	1	6297	high
TCGA-77-8130	0	69	1	2	1	0	2	6378	high
TCGA-NK-A7XE	0	66	1	4	2	0	3	6401	high
TCGA-55-8097	0	60	0	1	0	1	1	6413	high
TCGA-85-7696	0	64	1	1	0	0	1	6419	high
TCGA-33-AAS8	1	59	0	1	0	1	1	6439	high
TCGA-34-5928	0	83	0	2	1	0	2	6439	high
TCGA-55-8507	0	53	1	1	0	1	1	6457	high
TCGA-55-8302	0	54	1	2	0	1	1	6470	high
TCGA-55-6543	0	60	0	1	0	1	1	6506	high
TCGA-44-A4SS	0	73	1	1	0	0	1	6530	high
TCGA-97-A4M3	0	69	0	1	0	0	1	6541	high
TCGA-86-8668	0	61	0	1	0	0	1	6597	high
TCGA-J1-A4AH	0	70	1	2	0	1	2	6607	high
TCGA-22-5489	1	64	1	1	0	0	1	6667	high
TCGA-77-A5GA	0	76	1	2	0	0	1	6745	high
TCGA-56-8625	1	66	0	3	1	1	3	6765	high
TCGA-85-A4QQ	1	68	1	2	0	0	1	6773	high
TCGA-56-5898	0	69	1	1	0	0	1	6781	high
TCGA-70-6722	0	47	1	3	1	0	3	6826	high
TCGA-64-5778	0	60	1	2	0	0	1	6834	high
TCGA-85-A50M	1	47	1	2	0	0	2	6847	high
TCGA-77-6842	1	79	1	2	1	0	2	6860	high
TCGA-50-8457	0	63	0	1	0	0	1	6893	high
TCGA-52-7810	0	60	0	3	0	0	2	6918	high
TCGA-NJ-A55R	0	67	1	1	0	1	1	6937	high
TCGA-50-5944	0	69	0	1	0	0	1	6950	high
TCGA-L3-A4E7	0	71	1	2	0	0	1	6964	high
TCGA-05-4425	0	70	0	2	0	1	4	6984	high
TCGA-77-A5GH	0	81	1	2	0	0	1	6988	high
TCGA-49-4490	1	45	0	3	2	0	3	6994	high
TCGA-44-A47F	0	74	1	2	1	0	2	7000	high
TCGA-97-A4M7	0	74	1	1	0	0	1	7010	high
TCGA-85-8288	1	70	1	1	1	0	2	7011	high
TCGA-60-2720	0	60	0	2	0	0	1	7042	high
TCGA-77-7138	1	67	1	2	0	0	1	7055	high
TCGA-86-8671	0	72	0	2	1	0	2	7088	high
TCGA-83-5908	0	59	0	1	0	0	1	7089	high
TCGA-73-7499	1	81	0	2	0	0	1	7090	high
TCGA-44-A47G	0	73	0	1	0	0	1	7201	high
TCGA-58-A46L	0	73	1	2	2	0	3	7202	high
TCGA-55-A492	0	70	0	1	0	1	1	7261	high
TCGA-56-8624	0	84	1	3	0	1	2	7285	high
TCGA-NC-A5HP	1	69	1	2	0	1	4	7294	high
TCGA-34-2596	1	70	1	2	1	0	2	7297	high
TCGA-94-8035	0	64	1	3	0	1	2	7303	high
TCGA-50-5072	1	74	1	2	2	0	3	7309	high
TCGA-67-3770	0	70	0	1	0	0	1	7311	high
TCGA-77-7335	1	62	0	4	2	0	3	7314	high
TCGA-60-2697	1	41	1	2	2	0	2	7345	high
TCGA-L3-A524	1	45	0	3	0	0	2	7363	high
TCGA-97-A4M5	0	83	1	1	0	0	1	7407	high
TCGA-56-7580	0	84	1	2	0	0	1	7408	high
TCGA-92-7341	0	71	1	2	0	1	1	7414	high
TCGA-56-A62T	0	78	1	2	0	1	2	7433	high
TCGA-90-7767	0	56	1	2	1	1	2	7433	high
TCGA-O2-A52W	1	63	1	2	0	1	1	7448	high
TCGA-77-A5G8	0	70	1	3	0	0	2	7479	high
TCGA-43-3394	1	52	1	2	0	0	1	7491	high
TCGA-49-4501	1	67	0	2	0	0	1	7500	high
TCGA-98-A53B	1	69	1	2	0	0	1	7518	high
TCGA-50-6593	1	49	0	1	2	0	3	7521	high
TCGA-85-A5B5	0	58	1	1	0	0	1	7523	high
TCGA-96-A4JK	0	65	1	2	1	0	2	7527	high
TCGA-MP-A4SY	1	61	1	2	1	0	2	7529	high
TCGA-MN-A4N1	0	60	1	2	1	0	2	7574	high
TCGA-22-4605	1	78	0	2	0	0	1	7641	high
TCGA-77-A5G1	0	75	1	3	1	0	3	7664	high
TCGA-62-8394	1	65	0	4	2	0	3	7669	high
TCGA-64-5779	0	61	1	2	2	0	3	7677	high
TCGA-77-8148	0	68	1	3	1	0	3	7709	high
TCGA-L9-A743	0	56	1	2	1	0	2	7725	high
TCGA-39-5022	1	76	1	2	0	0	1	7730	high
TCGA-49-4488	1	74	0	1	0	1	1	7808	high
TCGA-50-5055	1	79	0	1	1	0	2	7847	high
TCGA-85-A53L	0	63	1	2	0	0	2	7851	high
TCGA-86-6562	1	52	1	2	1	0	2	7857	high
TCGA-NC-A5HT	0	69	1	3	1	0	3	7857	high
TCGA-77-7141	0	64	1	2	0	0	1	7873	high
TCGA-43-7657	0	68	0	1	0	1	1	7882	high
TCGA-63-A5MB	0	62	1	2	0	0	1	7903	high
TCGA-22-5481	1	72	0	2	1	0	2	7912	high
TCGA-60-2704	1	73	1	2	1	0	2	7914	high
TCGA-63-A5MT	0	74	1	3	0	0	2	7919	high
TCGA-77-7463	1	75	1	2	0	0	1	7977	high
TCGA-95-8494	0	67	1	2	1	0	2	8013	high
TCGA-85-A511	1	62	1	2	1	0	2	8053	high
TCGA-50-5932	1	75	1	2	1	0	2	8077	high
TCGA-69-7979	0	71	0	2	0	1	1	8112	high
TCGA-97-8174	1	67	1	2	0	0	2	8117	high
TCGA-MP-A5C7	0	76	0	2	0	0	1	8148	high
TCGA-86-8074	0	62	0	1	1	0	2	8170	high
TCGA-NJ-A7XG	0	49	1	4	1	0	3	8210	high
TCGA-77-8138	1	74	1	2	0	0	1	8235	high
TCGA-77-7338	1	64	1	2	0	0	1	8238	high
TCGA-77-7337	1	65	1	2	1	0	2	8243	high
TCGA-63-A5MS	0	78	1	2	0	0	1	8248	high
TCGA-68-8251	0	78	1	2	0	0	1	8253	high
TCGA-63-A5MG	0	68	1	2	0	0	1	8400	high
TCGA-56-7579	1	61	1	3	1	0	3	8417	high
TCGA-34-5239	0	75	1	4	0	0	3	8430	high
TCGA-86-8672	1	59	1	3	0	0	2	8511	high
TCGA-95-A4VK	0	74	0	2	2	0	3	8528	high
TCGA-44-8119	0	73	1	3	0	0	2	8557	high
TCGA-MP-A4TA	1	75	0	1	0	0	1	8573	high
TCGA-43-7656	0	71	1	1	0	1	1	8630	high
TCGA-85-7697	0	49	1	3	0	0	2	8651	high
TCGA-56-8622	0	68	1	2	0	0	1	8654	high
TCGA-50-5930	1	47	1	2	2	0	3	8669	high
TCGA-96-A4JL	0	78	0	2	1	0	2	8682	high
TCGA-33-AASB	1	66	1	2	0	1	1	8751	high
TCGA-86-8673	0	61	1	2	0	0	1	8797	high
TCGA-97-8172	0	75	0	2	0	0	1	9014	high
TCGA-95-8039	0	72	1	1	0	1	1	9025	high
TCGA-98-8021	0	75	0	1	0	0	1	9032	high
TCGA-LA-A7SW	1	71	1	3	1	1	3	9102	high
TCGA-93-7347	0	76	0	1	0	1	1	9105	high
TCGA-33-AASJ	1	60	1	2	0	1	1	9137	high
TCGA-85-7698	0	48	1	1	0	0	1	9145	high
TCGA-85-8052	0	53	1	3	0	0	2	9151	high
TCGA-86-8585	0	57	1	2	0	0	1	9153	high
TCGA-55-7726	0	72	0	1	0	1	1	9173	high
TCGA-MP-A4TI	1	72	1	2	1	0	2	9174	high
TCGA-43-A56V	0	61	1	2	2	0	3	9187	high
TCGA-77-6843	1	74	1	1	1	0	2	9206	high
TCGA-77-8139	0	72	1	3	0	0	2	9229	high
TCGA-43-A474	0	66	1	2	0	0	2	9284	high
TCGA-85-8048	0	62	1	1	0	0	1	9298	high
TCGA-55-6985	0	58	0	2	0	1	1	9462	high
TCGA-22-4609	1	81	1	1	0	0	1	9502	high
TCGA-50-5931	1	75	0	2	0	0	1	9548	high
TCGA-85-6175	1	63	0	3	0	0	2	9553	high
TCGA-44-2655	0	65	0	1	0	0	1	9590	high
TCGA-55-8614	0	76	1	2	0	1	1	9605	high
TCGA-86-A4P7	0	63	0	2	0	0	1	9625	high
TCGA-33-AASI	1	65	0	2	1	1	2	9639	high
TCGA-98-A539	0	63	1	3	0	0	2	9665	high
TCGA-44-A4SU	1	67	0	1	0	1	1	9703	high
TCGA-63-A5MV	0	69	1	2	0	0	2	9781	high
TCGA-56-8305	0	72	1	2	0	0	1	9868	high
TCGA-98-8023	0	70	1	3	1	0	3	9891	high
TCGA-05-4384	0	66	1	2	2	0	3	9898	high
TCGA-J2-8192	0	65	0	2	1	1	2	9943	high
TCGA-XC-AA0X	1	77	0	1	0	0	1	9956	high
TCGA-56-8628	0	78	1	1	0	1	1	9956	high
TCGA-86-8076	0	42	1	1	0	0	1	10017	high
TCGA-S2-AA1A	0	68	0	1	0	0	1	10048	high
TCGA-NK-A5CX	0	73	1	2	0	1	2	10054	high
TCGA-94-A4VJ	0	71	0	1	0	0	1	10055	high
TCGA-38-A44F	0	80	1	2	0	0	1	10075	high
TCGA-63-A5MM	1	69	0	2	1	0	2	10101	high
TCGA-68-7756	0	84	1	4	1	1	3	10103	high
TCGA-77-8136	1	74	0	2	1	0	2	10108	high
TCGA-O2-A52V	1	75	0	3	0	1	2	10119	high
TCGA-56-7822	1	75	1	2	1	0	2	10163	high
TCGA-98-A53D	1	68	1	3	0	0	2	10229	high
TCGA-52-7811	1	67	1	2	0	0	1	10247	high
TCGA-60-2709	0	69	1	2	0	1	1	10278	high
TCGA-43-6647	0	69	0	2	1	1	2	10340	high
TCGA-99-8032	0	61	1	1	0	0	1	10431	high
TCGA-96-7545	1	73	1	1	0	1	1	10448	high
TCGA-56-8626	1	59	1	1	0	1	1	10516	high
TCGA-97-A4M1	0	52	0	1	0	0	1	10631	high
TCGA-63-A5MR	0	70	0	2	0	0	1	10645	high
TCGA-97-8177	0	59	0	2	0	0	1	10687	high
TCGA-55-6979	1	59	0	2	1	0	2	10848	high
TCGA-86-8674	0	50	1	2	1	0	2	10860	high
TCGA-68-7757	0	74	1	1	0	1	1	10945	high
TCGA-50-5935	1	86	0	1	0	0	1	10950	high
TCGA-50-8459	0	68	1	3	0	0	2	10960	high
TCGA-43-A56U	0	76	0	1	0	1	1	10984	high
TCGA-77-A5FZ	1	64	1	4	0	0	3	10985	high
TCGA-97-A4M6	0	45	0	1	0	0	1	11004	high
TCGA-64-5781	0	55	0	2	0	0	1	11143	high
TCGA-69-7980	0	70	0	1	0	0	1	11165	high
TCGA-NJ-A55O	0	56	0	1	1	0	2	11182	high
TCGA-56-8503	0	76	0	3	0	0	2	11263	high
TCGA-52-7622	0	62	0	1	0	0	1	11272	high
TCGA-99-8025	0	72	0	3	2	0	3	11297	high
TCGA-49-AAR4	1	51	1	2	2	1	3	11347	high
TCGA-55-7284	1	74	1	3	0	1	2	11380	high
TCGA-55-7728	0	64	0	2	0	1	1	11427	high
TCGA-21-5784	0	80	0	2	0	0	1	11446	high
TCGA-55-8299	1	61	0	1	0	1	1	11505	high
TCGA-77-8145	1	73	1	4	1	0	3	11556	high
TCGA-34-5236	1	60	1	3	0	0	2	11561	high
TCGA-91-8497	1	75	0	1	0	1	1	11659	high
TCGA-95-7043	1	63	0	1	0	1	1	11782	high
TCGA-62-8395	0	80	0	3	0	0	2	11833	high
TCGA-73-4658	1	80	0	2	0	0	1	11893	high
TCGA-78-8648	1	58	0	3	0	0	2	11893	high
TCGA-49-AAQV	1	63	0	1	1	1	2	11926	high
TCGA-85-8350	0	61	1	1	0	0	1	11989	high
TCGA-86-8280	0	54	0	2	0	0	2	11989	high
TCGA-86-8075	1	66	0	2	0	0	1	12031	high
TCGA-55-6970	1	67	0	2	2	1	3	12079	high
TCGA-49-AARN	1	56	0	1	0	1	1	12147	high
TCGA-55-8510	0	55	0	2	0	1	1	12147	high
TCGA-21-A5DI	0	77	1	1	0	0	1	12192	high
TCGA-56-7731	1	66	0	2	0	1	1	12238	high
TCGA-05-5429	1	60	1	3	2	0	3	12242	high
TCGA-21-5782	1	68	0	2	0	0	1	12425	high
TCGA-22-5479	1	64	1	2	0	0	1	12481	high
TCGA-55-6971	0	59	0	2	0	1	1	12504	high
TCGA-55-8505	0	62	1	1	2	1	3	12547	high
TCGA-49-AAR0	0	57	1	1	0	1	1	12685	high
TCGA-MP-A4TD	1	71	1	2	2	0	3	12722	high
TCGA-85-7844	0	71	1	2	0	0	1	12758	high
TCGA-77-8128	1	60	1	2	2	0	3	12853	high
TCGA-85-8481	1	70	1	3	0	0	2	12867	high
TCGA-90-A4ED	0	69	1	2	0	1	1	12898	high
TCGA-55-A57B	0	80	0	1	0	0	1	12970	high
TCGA-68-8250	0	66	1	1	0	1	1	13031	high
TCGA-67-6217	0	73	0	2	1	0	2	13091	high
TCGA-86-8073	0	58	1	2	0	0	1	13168	high
TCGA-39-5019	0	70	1	2	0	0	1	13309	high
TCGA-55-6968	1	61	1	1	0	1	4	13315	high
TCGA-55-8206	0	56	1	1	0	0	1	13360	high
TCGA-55-6981	1	53	0	1	2	0	3	13417	high
TCGA-85-A4JC	1	84	1	2	0	0	2	13442	high
TCGA-69-8253	0	59	0	1	1	1	2	13712	high
TCGA-90-7964	0	70	1	2	0	1	1	13820	high
TCGA-49-AAR3	0	69	1	2	1	1	2	13820	high
TCGA-94-7033	0	73	1	2	0	1	1	13884	high
TCGA-86-A4P8	0	59	0	1	2	1	3	13979	high
TCGA-91-6848	0	59	1	2	2	1	3	13994	high
TCGA-69-8453	0	77	1	3	0	1	2	14000	high
TCGA-85-8049	0	57	1	2	0	0	1	14077	high
TCGA-44-6774	0	56	0	1	2	0	3	14243	high
TCGA-MP-A4TH	0	70	0	1	0	0	1	14261	high
TCGA-J2-A4AD	1	61	0	1	0	1	1	14262	high
TCGA-95-A4VP	0	66	0	2	2	0	3	14304	high
TCGA-43-8115	0	72	0	2	1	1	2	14508	high
TCGA-55-8301	0	58	1	2	0	1	1	14561	high
TCGA-93-A4JN	0	71	1	2	0	1	4	14811	high
TCGA-34-5234	0	71	0	1	0	0	1	14897	high
TCGA-NJ-A4YG	0	65	1	2	0	0	1	15108	high
TCGA-44-8120	0	58	1	2	0	0	1	15196	high
TCGA-NC-A5HJ	1	59	1	3	0	0	2	15324	high
TCGA-49-AARO	0	39	0	1	0	1	1	15582	high
TCGA-77-8133	1	74	1	1	1	0	2	15644	high
TCGA-86-8055	1	79	1	2	1	0	2	16152	high
TCGA-55-8087	0	59	0	2	0	1	1	16225	high
TCGA-55-8619	0	72	0	3	0	1	2	16291	high
TCGA-58-A46J	0	64	1	2	1	0	2	16546	high
TCGA-MP-A4TC	1	77	1	1	2	0	3	16565	high
TCGA-95-7039	0	54	0	3	0	1	2	16573	high
TCGA-34-7107	1	70	1	2	0	0	2	16625	high
TCGA-44-6144	0	58	1	1	0	0	1	16729	high
TCGA-44-6146	0	64	1	3	0	0	2	17132	high
TCGA-98-8020	1	56	0	2	2	0	3	17406	high
TCGA-56-A4ZJ	0	75	0	1	0	0	1	17486	high
TCGA-56-8623	1	71	1	2	0	1	1	17730	high
TCGA-55-6972	1	72	1	2	0	0	1	17778	high
TCGA-55-8513	0	77	0	3	0	1	2	17867	high
TCGA-55-8204	0	87	0	2	0	1	1	18020	high
TCGA-77-8008	1	68	1	2	0	0	1	18162	high
TCGA-55-6987	0	77	1	1	0	0	1	18264	high
TCGA-91-6840	0	59	0	1	0	0	1	18736	high
TCGA-99-AA5R	0	70	0	1	0	0	1	18769	high
TCGA-98-A53C	0	77	0	1	0	0	1	18975	high
TCGA-92-7340	0	45	0	2	1	1	2	19028	high
TCGA-98-A53H	0	76	0	1	0	0	1	19199	high
TCGA-55-8621	0	75	0	1	0	1	1	19530	high
TCGA-73-7498	0	58	0	1	0	0	1	19613	high
TCGA-49-AARR	0	68	1	1	0	1	1	19760	high
TCGA-55-6984	1	71	0	2	1	0	2	19937	high
TCGA-56-7221	0	79	1	2	0	0	1	20236	high
TCGA-91-6849	0	75	0	2	2	1	3	20617	high
TCGA-97-7941	0	72	0	1	0	1	1	20625	high
TCGA-MP-A4TK	1	56	0	2	1	1	2	20632	high
TCGA-77-6844	1	74	1	3	1	0	3	21368	high
TCGA-97-8552	0	55	0	1	0	1	1	21609	high
TCGA-55-6982	1	79	0	2	1	0	2	21966	high
TCGA-NJ-A55A	0	76	0	2	0	0	1	23807	high
TCGA-55-8096	1	67	0	2	0	1	1	24888	high
TCGA-90-6837	0	64	1	3	0	1	2	25037	high
TCGA-55-6969	0	52	1	2	0	0	1	25522	high
TCGA-55-6986	0	74	0	2	0	0	1	25748	high
TCGA-50-5946	0	62	1	1	0	1	1	26542	high
TCGA-55-8512	1	41	1	1	1	1	4	27511	high
TCGA-98-8022	1	61	1	1	0	0	1	28204	high
TCGA-44-6148	0	60	1	1	0	0	1	28744	high
TCGA-49-6761	0	68	0	1	2	1	3	30652	high
TCGA-MP-A4T9	1	54	0	2	2	1	3	30961	high
TCGA-85-6798	1	57	1	3	1	0	3	32166	high
TCGA-55-6978	1	81	1	2	0	1	2	33346	high
TCGA-43-6773	1	76	1	2	1	1	2	33546	high
TCGA-33-6738	0	80	1	1	2	1	3	34532	high
TCGA-50-6673	1	84	0	1	0	0	1	35923	high
TCGA-55-6983	0	81	1	2	1	0	2	37576	high
TCGA-91-6830	0	65	0	1	1	1	2	38924	high
TCGA-56-A4BY	1	66	1	2	0	1	1	39035	high
TCGA-97-8179	0	72	1	1	0	0	1	40026	high
TCGA-55-6980	0	56	1	1	0	0	1	55810	high
