# Supplementary material for: circMET promotes NSCLC cell proliferation, metastasis, and immune evasion by regulating the miR-145-5p/CXCL3 axis
Source: Aging (Albany NY). 2020 Jul 2;12(13):13038–58. doi: 10.18632/aging.103392 (PMC7377868; doi:10.18632/aging.103392)
Supplement: Supplementary Data 4 [file aging-12-103392-s002..xlsx]

## Sheet: miR-145-5p
Supplementary Data 4. CXCL3 From TCGA database.
case_id	submitter_id	project_id	gender	year_of_birth	race	ethnicity	year_of_death	classification_of_tumor	last_known_disease_status	primary_diagnosis	tumor_stage	age_at_diagnosis	vital_status	morphology	days_to_death	days_to_last_known_disease_status	days_to_recurrence	tumor_grade	tissue_or_organ_of_origin	days_to_birth	progression_or_recurrence	prior_malignancy	site_of_resection_or_biopsy	days_to_last_follow_up	therapeutic_agents	treatment_intent_type	treatment_or_therapy
ffb0c0b7-165e-4439-b3e6-62431f40b7fe	TCGA-44-3398	TCGA-LUAD	female	1932	white	not hispanic or latino	--	not reported	not reported	Adenocarcinoma, NOS	stage ia	28392	alive	8140-03-01	--	--	--	not reported	Lower lobe, lung	-28392	not reported	not reported	Lower lobe, lung	1163	--	--	--
f98ecd8a-b878-4f53-b911-20cd8e17281c	TCGA-05-4250	TCGA-LUAD	female	1928	not reported	not reported	2007	not reported	not reported	Adenocarcinoma, NOS	stage iiia	29068	dead	8140-03-01	121	--	--	not reported	Lower lobe, lung	-29068	not reported	not reported	Lower lobe, lung	--	--	--	--
ccfdad76-cc45-447f-bed8-ede8f6a8844d	TCGA-55-7283	TCGA-LUAD	female	1935	white	not hispanic or latino	--	not reported	not reported	Bronchiolo-alveolar carcinoma, non-mucinous	stage iiia	27946	alive	8252-03-01	--	--	--	not reported	Upper lobe, lung	-27946	not reported	not reported	Upper lobe, lung	609	--	--	--
9fcdccae-676e-4071-93c3-23d2d3ab0c00	TCGA-55-7725	TCGA-LUAD	female	1943	white	not hispanic or latino	--	not reported	not reported	Adenocarcinoma, NOS	stage ia	24848	alive	8140-03-01	--	--	--	not reported	Lower lobe, lung	-24848	not reported	not reported	Lower lobe, lung	442	--	--	--
0232d299-4cdf-4fd7-9a5e-8d13c208b40c	TCGA-91-6848	TCGA-LUAD	male	1950	white	not hispanic or latino	--	not reported	not reported	Adenocarcinoma, NOS	stage iiia	21829	alive	8140-03-01	--	--	--	not reported	Upper lobe, lung	-21829	not reported	not reported	Upper lobe, lung	224	--	--	--
bc4c4079-b449-485d-84e4-a40496e563e8	TCGA-86-8673	TCGA-LUAD	male	1950	white	not hispanic or latino	--	not reported	not reported	Bronchiolo-alveolar carcinoma, non-mucinous	stage ib	22571	alive	8252-03-01	--	--	--	not reported	Upper lobe, lung	-22571	not reported	not reported	Upper lobe, lung	862	--	--	--
a5bd7d50-9c14-49e6-89cf-6bf440c42309	TCGA-69-7979	TCGA-LUAD	female	1940	white	not hispanic or latino	--	not reported	not reported	Acinar cell carcinoma	stage ib	26180	alive	8550-03-01	--	--	--	not reported	Upper lobe, lung	-26180	not reported	not reported	Upper lobe, lung	408	--	--	--
bab43415-d413-40be-a4c0-2c40a52afe6a	TCGA-44-2668	TCGA-LUAD	male	1958	white	not hispanic or latino	--	not reported	not reported	Adenocarcinoma, NOS	stage ib	18856	dead	8140-03-01	761	--	--	not reported	Upper lobe, lung	-18856	not reported	not reported	Upper lobe, lung	246	--	--	--
1c339545-c08a-4a77-b8e9-a7e49e53853f	TCGA-50-5944	TCGA-LUAD	female	1941	white	not reported	--	not reported	not reported	Acinar cell carcinoma	stage ia	25440	alive	8550-03-01	--	--	--	not reported	Upper lobe, lung	-25440	not reported	not reported	Upper lobe, lung	1750	--	--	--
9c7875ad-ab71-4d48-b2e3-e4c7a46393e9	TCGA-49-6745	TCGA-LUAD	male	1929	white	not reported	--	not reported	not reported	Papillary adenocarcinoma, NOS	stage iiia	30133	alive	8260-03-01	--	--	--	not reported	Upper lobe, lung	-30133	not reported	not reported	Upper lobe, lung	522	--	--	--
ddeacccf-0953-4952-8a4e-c2617f2e7bcc	TCGA-44-5645	TCGA-LUAD	female	1949	black or african american	not hispanic or latino	--	not reported	not reported	Adenocarcinoma, NOS	stage ia	22471	alive	8140-03-01	--	--	--	not reported	Upper lobe, lung	-22471	not reported	not reported	Upper lobe, lung	852	--	--	--
528a0fce-0719-4b19-a69d-3f18681696c5	TCGA-86-A4D0	TCGA-LUAD	male	1964	white	not hispanic or latino	--	not reported	not reported	Adenocarcinoma, NOS	stage iia	17607	dead	8140-03-01	116	--	--	not reported	Upper lobe, lung	-17607	not reported	not reported	Upper lobe, lung	30	--	--	--
3daebe75-c6df-478e-8a4c-11186fd5ead9	TCGA-93-A4JO	TCGA-LUAD	male	1942	white	not hispanic or latino	2012	not reported	not reported	Adenocarcinoma with mixed subtypes	stage ia	25898	dead	8255-03-01	33	--	--	not reported	Lower lobe, lung	-25898	not reported	not reported	Lower lobe, lung	--	--	--	--
3199cfe5-3be3-43cd-a36b-5cf2c7a9929f	TCGA-50-5066	TCGA-LUAD	male	1937	black or african american	not hispanic or latino	--	not reported	not reported	Adenocarcinoma with mixed subtypes	stage ib	26385	alive	8255-03-01	--	--	--	not reported	Upper lobe, lung	-26385	not reported	not reported	Upper lobe, lung	1442	--	--	--
f063ddbb-1668-40df-9ec2-b0a23ca2c389	TCGA-55-6984	TCGA-LUAD	female	1935	white	not hispanic or latino	2008	not reported	not reported	Adenocarcinoma, NOS	stage iib	--	dead	8140-03-01	760	--	--	not reported	Lower lobe, lung	--	not reported	not reported	Lower lobe, lung	--	--	--	--
1c58d9b8-17a2-4fc6-9898-fe6f47bd2c2a	TCGA-64-5779	TCGA-LUAD	male	1948	white	not hispanic or latino	--	not reported	not reported	Acinar cell carcinoma	stage iiia	22305	alive	8550-03-01	--	--	--	not reported	Lower lobe, lung	-22305	not reported	not reported	Lower lobe, lung	864	--	--	--
96dfa373-4597-49a5-942e-d9b4dc5d28fc	TCGA-49-AAQV	TCGA-LUAD	female	1949	black or african american	not hispanic or latino	2013	not reported	not reported	Adenocarcinoma with mixed subtypes	stage ii	23370	dead	8255-03-01	677	--	--	not reported	Lower lobe, lung	-23370	not reported	not reported	Lower lobe, lung	--	--	--	--
7fd03220-531e-4ef8-beca-e9703e8c0ae1	TCGA-NJ-A4YG	TCGA-LUAD	male	1943	white	not reported	--	not reported	not reported	Adenocarcinoma with mixed subtypes	stage ib	23812	alive	8255-03-01	--	--	--	not reported	Upper lobe, lung	-23812	not reported	not reported	Upper lobe, lung	2261	--	--	--
16cd58db-d52c-403e-9e9c-6da2e99f6bad	TCGA-78-7162	TCGA-LUAD	male	1916	white	not reported	1999	not reported	not reported	Adenocarcinoma with mixed subtypes	stage ia	27593	dead	8255-03-01	3169	--	--	not reported	Upper lobe, lung	-27593	not reported	not reported	Upper lobe, lung	--	--	--	--
f3501466-cf32-4866-b5fb-e94dd32341bc	TCGA-44-2661	TCGA-LUAD	female	1940	white	not hispanic or latino	--	not reported	not reported	Adenocarcinoma, NOS	stage ia	25313	alive	8140-03-01	--	--	--	not reported	Upper lobe, lung	-25313	not reported	not reported	Upper lobe, lung	1159	--	--	--
c650b1ff-8a4c-4ee9-b7c1-268c28c83827	TCGA-95-7043	TCGA-LUAD	female	1948	white	not hispanic or latino	--	not reported	not reported	Adenocarcinoma with mixed subtypes	stage ia	23165	dead	8255-03-01	503	--	--	not reported	Upper lobe, lung	-23165	not reported	not reported	Upper lobe, lung	37	--	--	--
35cb7841-9b09-465a-90c5-e3b8a9faad49	TCGA-55-6982	TCGA-LUAD	female	1925	white	not reported	2006	not reported	not reported	Adenocarcinoma, NOS	stage iib	--	dead	8140-03-01	995	--	--	not reported	Lower lobe, lung	--	not reported	not reported	Lower lobe, lung	--	--	--	--
e68219b0-a9c2-49df-8f0d-db5ea97fd2dc	TCGA-55-6543	TCGA-LUAD	female	1950	white	not reported	--	not reported	not reported	Bronchio-alveolar carcinoma, mucinous	stage ia	--	alive	8253-03-01	--	--	--	not reported	Upper lobe, lung	--	not reported	not reported	Upper lobe, lung	435	--	--	--
d2c1e896-6886-4122-bb48-5fbcd3f641f4	TCGA-05-4418	TCGA-LUAD	male	1939	not reported	not reported	2008	not reported	not reported	Adenocarcinoma with mixed subtypes	stage iiia	25417	dead	8255-03-01	274	--	--	not reported	Lower lobe, lung	-25417	not reported	not reported	Lower lobe, lung	--	--	--	--
a41c46da-7ed4-4192-bd16-b3cbb94a5133	TCGA-55-1592	TCGA-LUAD	male	1940	white	not hispanic or latino	2006	not reported	not reported	Adenocarcinoma, NOS	stage ia	--	dead	8140-03-01	701	--	--	not reported	Upper lobe, lung	--	not reported	not reported	Upper lobe, lung	--	--	--	--
bf34664d-423d-4257-99d4-797f7d366455	TCGA-44-A4SU	TCGA-LUAD	female	1945	white	not hispanic or latino	--	not reported	not reported	Adenocarcinoma, NOS	stage ia	24820	dead	8140-03-01	409	--	--	not reported	Lower lobe, lung	-24820	not reported	not reported	Lower lobe, lung	76	--	--	--
6bffe800-ec2b-4638-9333-97fe85dcd91c	TCGA-49-6767	TCGA-LUAD	female	1964	white	not reported	--	not reported	not reported	Adenocarcinoma, NOS	stage iib	17108	alive	8140-03-01	--	--	--	not reported	Middle lobe, lung	-17108	not reported	not reported	Middle lobe, lung	677	--	--	--
da345947-498b-4272-a231-a987ed4fe151	TCGA-44-A47G	TCGA-LUAD	female	1939	white	not hispanic or latino	--	not reported	not reported	Adenocarcinoma, NOS	stage ia	26800	alive	8140-03-01	--	--	--	not reported	Upper lobe, lung	-26800	not reported	not reported	Upper lobe, lung	351	--	--	--
ff9def3d-17e5-4ef6-b74e-933f11ed6f00	TCGA-78-7146	TCGA-LUAD	female	1928	white	not reported	1999	not reported	not reported	Adenocarcinoma with mixed subtypes	stage iiia	26272	dead	8255-03-01	173	--	--	not reported	Lower lobe, lung	-26272	not reported	not reported	Lower lobe, lung	--	--	--	--
36bf02f8-c1c8-49f9-a417-adf88a205c70	TCGA-05-4426	TCGA-LUAD	male	1937	not reported	not reported	--	not reported	not reported	Adenocarcinoma with mixed subtypes	stage ib	26084	alive	8255-03-01	--	--	--	not reported	Lower lobe, lung	-26084	not reported	not reported	Lower lobe, lung	791	--	--	--
69584d55-18f7-4786-b3cc-cd528500be44	TCGA-55-8094	TCGA-LUAD	male	1961	white	not hispanic or latino	--	not reported	not reported	Adenocarcinoma, NOS	stage iv	18903	alive	8140-03-01	--	--	--	not reported	Upper lobe, lung	-18903	not reported	not reported	Upper lobe, lung	541	--	--	--
4ef872e1-82c9-4939-9248-41ed9d3085b2	TCGA-78-7145	TCGA-LUAD	female	1948	white	not reported	2002	not reported	not reported	Adenocarcinoma, NOS	stage iv	19080	dead	8140-03-01	826	--	--	not reported	Middle lobe, lung	-19080	not reported	not reported	Middle lobe, lung	--	--	--	--
15340dd3-84ae-49fb-989a-eb212f3e73da	TCGA-49-6744	TCGA-LUAD	female	1946	white	not reported	--	not reported	not reported	Adenocarcinoma with mixed subtypes	stage iia	23484	alive	8255-03-01	--	--	--	not reported	Upper lobe, lung	-23484	not reported	not reported	Upper lobe, lung	1683	--	--	--
474b86d9-d897-467d-85d4-51dfa26ea107	TCGA-55-6642	TCGA-LUAD	male	1943	white	not reported	--	not reported	not reported	Adenocarcinoma, NOS	stage ib	23107	alive	8140-03-01	--	--	--	not reported	Lower lobe, lung	-23107	not reported	not reported	Lower lobe, lung	2449	--	--	--
e0acafdd-06d0-48a6-bd68-577ef666a419	TCGA-95-7947	TCGA-LUAD	male	1944	white	not hispanic or latino	--	not reported	not reported	Adenocarcinoma with mixed subtypes	stage ia	24752	alive	8255-03-01	--	--	--	not reported	Upper lobe, lung	-24752	not reported	not reported	Upper lobe, lung	477	--	--	--
4ad63dac-76a7-4527-abce-d7a0184e8739	TCGA-91-8497	TCGA-LUAD	female	1937	white	not hispanic or latino	--	not reported	not reported	Adenocarcinoma, NOS	stage ia	27632	dead	8140-03-01	434	--	--	not reported	Upper lobe, lung	-27632	not reported	not reported	Upper lobe, lung	174	--	--	--
889aec8e-14ba-48d9-8fe1-f2416e82b333	TCGA-44-6147	TCGA-LUAD	female	1943	white	not hispanic or latino	--	not reported	not reported	Adenocarcinoma, NOS	stage ia	24631	alive	8140-03-01	--	--	--	not reported	Upper lobe, lung	-24631	not reported	not reported	Upper lobe, lung	845	--	--	--
66763a0c-6cda-4832-a0cc-e7b496d78eaa	TCGA-05-4424	TCGA-LUAD	male	1938	not reported	not reported	--	not reported	not reported	Adenocarcinoma with mixed subtypes	stage iib	25689	alive	8255-03-01	--	--	--	not reported	Upper lobe, lung	-25689	not reported	not reported	Upper lobe, lung	913	--	--	--
4a1d30e8-e93a-41ed-8e54-08eaff6556a7	TCGA-L9-A444	TCGA-LUAD	female	1952	white	not hispanic or latino	--	not reported	not reported	Adenocarcinoma, NOS	stage ia	22202	alive	8140-03-01	--	--	--	not reported	Upper lobe, lung	-22202	not reported	not reported	Upper lobe, lung	307	--	--	--
9f81c602-8afa-4588-b0b6-6e5a1a128d5a	TCGA-05-4396	TCGA-LUAD	male	1930	not reported	not reported	2006	not reported	not reported	Adenocarcinoma with mixed subtypes	stage iiib	28094	dead	8255-03-01	303	--	--	not reported	Lower lobe, lung	-28094	not reported	not reported	Lower lobe, lung	--	--	--	--
f2d8b332-2f03-46e5-a9d5-f163972e5fa7	TCGA-86-8668	TCGA-LUAD	female	1951	white	not hispanic or latino	--	not reported	not reported	Bronchio-alveolar carcinoma, mucinous	stage ia	22383	alive	8253-03-01	--	--	--	not reported	Lower lobe, lung	-22383	not reported	not reported	Lower lobe, lung	423	--	--	--
a3de401d-91fe-49a2-bb07-81c1a06506e6	TCGA-05-4389	TCGA-LUAD	male	1935	not reported	not reported	--	not reported	not reported	Adenocarcinoma with mixed subtypes	stage ia	25660	alive	8255-03-01	--	--	--	not reported	Upper lobe, lung	-25660	not reported	not reported	Upper lobe, lung	1369	--	--	--
501c987e-d1eb-48a9-89eb-72a5062c90b4	TCGA-78-7158	TCGA-LUAD	female	1948	white	not reported	2007	not reported	not reported	Adenocarcinoma with mixed subtypes	stage iiib	21742	dead	8255-03-01	179	--	--	not reported	Lower lobe, lung	-21742	not reported	not reported	Lower lobe, lung	--	--	--	--
962fd4e7-9199-43d9-abce-e3dfa46da62c	TCGA-55-8510	TCGA-LUAD	female	1957	white	not hispanic or latino	--	not reported	not reported	Adenocarcinoma, NOS	stage ib	20410	alive	8140-03-01	--	--	--	not reported	Lower lobe, lung	-20410	not reported	not reported	Lower lobe, lung	539	--	--	--
fd3fc273-c035-40ea-a459-ff4806f5d592	TCGA-64-5774	TCGA-LUAD	male	1944	white	not hispanic or latino	--	not reported	not reported	Adenocarcinoma, NOS	stage ib	22059	alive	8140-03-01	--	--	--	not reported	Main bronchus	-22059	not reported	not reported	Main bronchus	2676	--	--	--
5d2a9a4f-678d-4089-a8c5-81a5cb696629	TCGA-35-5375	TCGA-LUAD	male	1949	white	not hispanic or latino	--	not reported	not reported	Adenocarcinoma, NOS	stage iiia	22628	alive	8140-03-01	--	--	--	not reported	Upper lobe, lung	-22628	not reported	not reported	Upper lobe, lung	264	--	--	--
c4cfa3cc-e305-42dd-be57-97efbb891659	TCGA-86-8671	TCGA-LUAD	female	1940	white	not hispanic or latino	--	not reported	not reported	Papillary adenocarcinoma, NOS	stage iib	26448	alive	8260-03-01	--	--	--	not reported	Upper lobe, lung	-26448	not reported	not reported	Upper lobe, lung	839	--	--	--
54775a66-08cc-4f38-98f2-e7b2b5cec994	TCGA-86-7953	TCGA-LUAD	female	1942	white	not hispanic or latino	--	not reported	not reported	Bronchiolo-alveolar adenocarcinoma, NOS	stage ia	25315	alive	8250-03-01	--	--	--	not reported	Upper lobe, lung	-25315	not reported	not reported	Upper lobe, lung	997	--	--	--
afe83af5-af22-49c0-88b4-f1d0dfcbe238	TCGA-55-8097	TCGA-LUAD	female	1952	white	not hispanic or latino	--	not reported	not reported	Adenocarcinoma, NOS	stage ia	22260	alive	8140-03-01	--	--	--	not reported	Upper lobe, lung	-22260	not reported	not reported	Upper lobe, lung	476	--	--	--
01e9888d-b5b9-48f1-8ba6-8a89af108a04	TCGA-NJ-A7XG	TCGA-LUAD	male	1964	black or african american	not hispanic or latino	--	not reported	not reported	Adenocarcinoma, NOS	stage iiia	18127	alive	8140-03-01	--	--	--	not reported	Upper lobe, lung	-18127	not reported	not reported	Upper lobe, lung	617	--	--	--
f17d3463-af6c-42c2-a8e9-fae45f69286f	TCGA-55-6712	TCGA-LUAD	male	1939	white	not reported	--	not reported	not reported	Adenocarcinoma, NOS	stage iia	--	dead	8140-03-01	171	--	--	not reported	Upper lobe, lung	--	not reported	not reported	Upper lobe, lung	24	--	--	--
a9644274-13bb-4228-9b4f-14260ccc26eb	TCGA-97-7554	TCGA-LUAD	female	1927	white	not hispanic or latino	--	not reported	not reported	Papillary adenocarcinoma, NOS	stage iiia	30327	alive	8260-03-01	--	--	--	not reported	Lower lobe, lung	-30327	not reported	not reported	Lower lobe, lung	775	--	--	--
ad74c0e8-8878-4efc-997d-981cd547bc5b	TCGA-73-7498	TCGA-LUAD	female	1952	white	not hispanic or latino	--	not reported	not reported	Bronchiolo-alveolar carcinoma, non-mucinous	stage ia	21527	alive	8252-03-01	--	--	--	not reported	Lower lobe, lung	-21527	not reported	not reported	Lower lobe, lung	1189	--	--	--
645903b5-ba37-48a1-985b-a019b8db3236	TCGA-80-5607	TCGA-LUAD	female	--	not reported	not reported	--	not reported	not reported	Adenocarcinoma, NOS	stage iib	--	alive	8140-03-01	--	--	--	not reported	Upper lobe, lung	--	not reported	not reported	Upper lobe, lung	--	--	--	--
b89de053-d253-447f-952e-9a2edcf6bca5	TCGA-55-A490	TCGA-LUAD	male	1934	white	not hispanic or latino	--	not reported	not reported	Adenocarcinoma, NOS	stage iia	28728	dead	8140-03-01	99	--	--	not reported	Upper lobe, lung	-28728	not reported	not reported	Upper lobe, lung	48	--	--	--
b56dad1e-2fd5-47d8-9cc7-a54be9a1bae2	TCGA-78-7152	TCGA-LUAD	male	1938	white	not reported	--	not reported	not reported	Adenocarcinoma with mixed subtypes	stage ib	23782	dead	8255-03-01	1215	--	--	not reported	Upper lobe, lung	-23782	not reported	not reported	Upper lobe, lung	1202	--	--	--
0a45f302-5748-48f3-9dc9-66c01843a68e	TCGA-55-6981	TCGA-LUAD	female	1952	white	not hispanic or latino	2008	not reported	not reported	Adenocarcinoma, NOS	stage iiia	19497	dead	8140-03-01	1379	--	--	not reported	Upper lobe, lung	-19497	not reported	not reported	Upper lobe, lung	--	--	--	--
e5f956dd-f49f-435c-83c3-5b1b0a2050ed	TCGA-J2-A4AE	TCGA-LUAD	female	1935	white	not hispanic or latino	--	not reported	not reported	Adenocarcinoma, NOS	stage ia	28163	alive	8140-03-01	--	--	--	not reported	Upper lobe, lung	-28163	not reported	not reported	Upper lobe, lung	1079	--	--	--
afb91740-2668-46d7-ba01-bb26153ad1c7	TCGA-73-4658	TCGA-LUAD	female	1924	white	not hispanic or latino	2008	not reported	not reported	Adenocarcinoma, NOS	stage ib	29508	dead	8140-03-01	1600	--	--	not reported	Lower lobe, lung	-29508	not reported	not reported	Lower lobe, lung	1600	--	--	--
0df573ee-28f0-4244-b434-09e6ca59fbf0	TCGA-67-3771	TCGA-LUAD	female	1932	black or african american	not hispanic or latino	--	not reported	not reported	Adenocarcinoma, NOS	stage ia	28406	alive	8140-03-01	--	--	--	not reported	Upper lobe, lung	-28406	not reported	not reported	Upper lobe, lung	610	--	--	--
7782ceaa-da49-4232-8b3f-534971adaad8	TCGA-73-7499	TCGA-LUAD	female	1929	white	not hispanic or latino	--	not reported	not reported	Adenocarcinoma with mixed subtypes	stage ib	29683	dead	8255-03-01	1531	--	--	not reported	Upper lobe, lung	-29683	not reported	not reported	Upper lobe, lung	715	--	--	--
5c06d97f-2aaa-43de-b085-09d7829356ba	TCGA-80-5608	TCGA-LUAD	female	--	not reported	not reported	--	not reported	not reported	Adenocarcinoma, NOS	stage ia	--	alive	8140-03-01	--	--	--	not reported	Upper lobe, lung	--	not reported	not reported	Upper lobe, lung	2832	--	--	--
c4d1e105-28b7-48df-abef-fbe09782fdb2	TCGA-55-6972	TCGA-LUAD	male	1933	white	not hispanic or latino	--	not reported	not reported	Papillary adenocarcinoma, NOS	stage ib	26625	dead	8260-03-01	1632	--	--	not reported	Upper lobe, lung	-26625	not reported	not reported	Upper lobe, lung	1475	--	--	--
9e640ff7-996e-427b-b56c-519a1e23baab	TCGA-86-A4P7	TCGA-LUAD	female	1949	white	not hispanic or latino	--	not reported	not reported	Adenocarcinoma, NOS	stage ib	23330	alive	8140-03-01	--	--	--	not reported	Lower lobe, lung	-23330	not reported	not reported	Lower lobe, lung	415	--	--	--
e739b4f7-ae46-45c6-9013-9571cbadaf99	TCGA-93-7348	TCGA-LUAD	female	1936	white	not hispanic or latino	--	not reported	not reported	Adenocarcinoma, NOS	stage ia	27456	alive	8140-03-01	--	--	--	not reported	Upper lobe, lung	-27456	not reported	not reported	Upper lobe, lung	531	--	--	--
243c6fd6-5516-46e5-bcef-292d93d7b7d3	TCGA-69-7764	TCGA-LUAD	male	1935	white	not hispanic or latino	--	not reported	not reported	Adenocarcinoma with mixed subtypes	stage ia	27693	alive	8255-03-01	--	--	--	not reported	Upper lobe, lung	-27693	not reported	not reported	Upper lobe, lung	414	--	--	--
e43a2b72-35c6-4466-9007-ce96caf77ea8	TCGA-55-A493	TCGA-LUAD	female	1958	white	not hispanic or latino	--	not reported	not reported	Adenocarcinoma, NOS	stage ib	20027	alive	8140-03-01	--	--	--	not reported	Upper lobe, lung	-20027	not reported	not reported	Upper lobe, lung	28	--	--	--
bf15f7ad-9d92-473b-91d1-f24aa373ab97	TCGA-44-2659	TCGA-LUAD	female	1944	white	not hispanic or latino	--	not reported	not reported	Adenocarcinoma, NOS	stage iib	23808	alive	8140-03-01	--	--	--	not reported	Lower lobe, lung	-23808	not reported	not reported	Lower lobe, lung	1367	--	--	--
096bd95f-9900-4db2-b1c4-103902c3b31f	TCGA-J2-A4AD	TCGA-LUAD	female	1951	white	not hispanic or latino	--	not reported	not reported	Adenocarcinoma, NOS	stage ia	22414	dead	8140-03-01	550	--	--	not reported	Upper lobe, lung	-22414	not reported	not reported	Upper lobe, lung	287	--	--	--
e254aaeb-012c-4d92-8a03-cce1f6a2bcd6	TCGA-55-8087	TCGA-LUAD	female	1952	white	not hispanic or latino	--	not reported	not reported	Adenocarcinoma, NOS	stage ib	21655	alive	8140-03-01	--	--	--	not reported	Upper lobe, lung	-21655	not reported	not reported	Upper lobe, lung	462	--	--	--
0c59ff96-5e4a-4664-a0b1-d057b4725483	TCGA-62-A46P	TCGA-LUAD	male	1941	white	not hispanic or latino	2007	not reported	not reported	Adenocarcinoma with mixed subtypes	stage ib	23993	dead	8255-03-01	594	--	--	not reported	Upper lobe, lung	-23993	not reported	not reported	Upper lobe, lung	--	--	--	--
e60a8f8a-0fe6-40e5-9f30-bcff48ac73f4	TCGA-62-A470	TCGA-LUAD	male	1925	white	not hispanic or latino	2012	not reported	not reported	Acinar cell carcinoma	stage ib	30689	dead	8550-03-01	1194	--	--	not reported	Upper lobe, lung	-30689	not reported	not reported	Upper lobe, lung	--	--	--	--
369f14c4-2191-4962-a309-3e23ddc4e5fc	TCGA-J2-8192	TCGA-LUAD	female	1946	white	not hispanic or latino	--	not reported	not reported	Adenocarcinoma, NOS	stage iia	23892	alive	8140-03-01	--	--	--	not reported	Upper lobe, lung	-23892	not reported	not reported	Upper lobe, lung	739	--	--	--
2db08267-d346-4d42-aac0-b76831903253	TCGA-75-6211	TCGA-LUAD	female	--	not reported	not reported	--	not reported	not reported	Adenocarcinoma, NOS	stage ib	--	dead	8140-03-01	--	--	--	not reported	Lung, NOS	--	not reported	not reported	Lung, NOS	--	--	--	--
47062ad2-ba82-45c8-a871-bdea84f0c405	TCGA-MP-A4T7	TCGA-LUAD	female	1930	not reported	not reported	2005	not reported	not reported	Adenocarcinoma, NOS	stage iv	27603	dead	8140-03-01	167	--	--	not reported	Lower lobe, lung	-27603	not reported	not reported	Lower lobe, lung	--	--	--	--
8981f0c9-7155-4c96-bf77-7d40fe404323	TCGA-69-7760	TCGA-LUAD	male	1938	white	not hispanic or latino	--	not reported	not reported	Adenocarcinoma with mixed subtypes	stage iib	26777	alive	8255-03-01	--	--	--	not reported	Lower lobe, lung	-26777	not reported	not reported	Lower lobe, lung	202	--	--	--
a250a369-e536-4a18-b7af-2911133d7bdc	TCGA-55-A491	TCGA-LUAD	female	1931	white	not hispanic or latino	--	not reported	not reported	Adenocarcinoma, NOS	stage ia	29593	alive	8140-03-01	--	--	--	not reported	Lower lobe, lung	-29593	not reported	not reported	Lower lobe, lung	626	--	--	--
0a1eea76-e19a-4547-9b24-abf7051cc4db	TCGA-86-8674	TCGA-LUAD	male	1962	white	not hispanic or latino	--	not reported	not reported	Papillary adenocarcinoma, NOS	stage iia	18479	alive	8260-03-01	--	--	--	not reported	Middle lobe, lung	-18479	not reported	not reported	Middle lobe, lung	806	--	--	--
7b89166e-c5b8-481b-aa70-495141499b91	TCGA-86-8669	TCGA-LUAD	male	1948	white	not hispanic or latino	--	not reported	not reported	Adenocarcinoma, NOS	stage ia	23443	alive	8140-03-01	--	--	--	not reported	Upper lobe, lung	-23443	not reported	not reported	Upper lobe, lung	938	--	--	--
5fe77d4a-a8a5-4c90-8ff2-9c3bbbb309ef	TCGA-97-A4M5	TCGA-LUAD	male	1929	white	not hispanic or latino	--	not reported	not reported	Adenocarcinoma with mixed subtypes	stage ia	30665	alive	8255-03-01	--	--	--	not reported	Upper lobe, lung	-30665	not reported	not reported	Upper lobe, lung	634	--	--	--
1b110eb4-a01d-4c50-ba18-77da4dedd549	TCGA-97-7552	TCGA-LUAD	male	1937	white	not hispanic or latino	--	not reported	not reported	Bronchio-alveolar carcinoma, mucinous	stage ib	25578	alive	8253-03-01	--	--	--	not reported	Lower lobe, lung	-25578	not reported	not reported	Lower lobe, lung	1932	--	--	--
a905d275-9283-4fa6-bbbf-46019bd1bcb7	TCGA-78-8655	TCGA-LUAD	female	1926	not reported	not reported	--	not reported	not reported	Adenocarcinoma with mixed subtypes	stage ia	28379	alive	8255-03-01	--	--	--	not reported	Lower lobe, lung	-28379	not reported	not reported	Lower lobe, lung	2360	--	--	--
54e90433-5218-4d83-848f-f995ecba2a63	TCGA-L9-A7SV	TCGA-LUAD	male	1944	black or african american	not hispanic or latino	--	not reported	not reported	Adenocarcinoma, NOS	stage iia	25298	alive	8140-03-01	--	--	--	not reported	Lower lobe, lung	-25298	not reported	not reported	Lower lobe, lung	565	--	--	--
8f52cccd-5709-4753-9670-31a573ee27ab	TCGA-MP-A4TJ	TCGA-LUAD	female	1944	not reported	not reported	2006	not reported	not reported	Signet ring cell carcinoma	stage ia	22875	dead	8490-03-01	339	--	--	not reported	Upper lobe, lung	-22875	not reported	not reported	Upper lobe, lung	--	--	--	--
f809e21d-5f2e-4f3b-a1aa-d6b8d463552a	TCGA-62-A46V	TCGA-LUAD	female	1929	white	not hispanic or latino	--	not reported	not reported	Adenocarcinoma with mixed subtypes	stage ib	28495	alive	8255-03-01	--	--	--	not reported	Lower lobe, lung	-28495	not reported	not reported	Lower lobe, lung	2199	--	--	--
807cc7d2-6e3b-4f2d-9531-0da994eeeada	TCGA-55-8302	TCGA-LUAD	male	1958	white	not reported	--	not reported	not reported	Adenocarcinoma, NOS	stage ib	20011	alive	8140-03-01	--	--	--	not reported	Lower lobe, lung	-20011	not reported	not reported	Lower lobe, lung	478	--	--	--
199386c2-bb53-4fad-a1b6-59ab216a4a50	TCGA-55-1596	TCGA-LUAD	male	1949	asian	not hispanic or latino	--	not reported	not reported	Adenocarcinoma, NOS	stage iib	20381	alive	8140-03-01	--	--	--	not reported	Upper lobe, lung	-20381	not reported	not reported	Upper lobe, lung	2065	--	--	--
adbaba9c-5efc-4130-82f6-8055eab13795	TCGA-55-A494	TCGA-LUAD	female	1951	white	not hispanic or latino	--	not reported	not reported	Adenocarcinoma, NOS	stage ib	22540	alive	8140-03-01	--	--	--	not reported	Lower lobe, lung	-22540	not reported	not reported	Lower lobe, lung	481	--	--	--
202e5df9-69f2-432c-a59d-cc5aa176e973	TCGA-55-8512	TCGA-LUAD	male	1971	white	not hispanic or latino	--	not reported	not reported	Bronchiolo-alveolar carcinoma, non-mucinous	stage iv	15266	dead	8252-03-01	607	--	--	not reported	Lower lobe, lung	-15266	not reported	not reported	Lower lobe, lung	3	--	--	--
c8544fb3-b26e-4672-bb81-a271db724b04	TCGA-64-5775	TCGA-LUAD	male	1934	white	not hispanic or latino	2005	not reported	not reported	Adenocarcinoma, NOS	stage iiia	26058	dead	8140-03-01	62	--	--	not reported	Upper lobe, lung	-26058	not reported	not reported	Upper lobe, lung	--	--	--	--
b8b5ed35-b299-4c1e-9226-5ca055dc7a43	TCGA-NJ-A55A	TCGA-LUAD	female	1933	white	not hispanic or latino	--	not reported	not reported	Acinar cell carcinoma	stage ib	28022	alive	8550-03-01	--	--	--	not reported	Lower lobe, lung	-28022	not reported	not reported	Lower lobe, lung	15	--	--	--
dc9eaaa0-0bfd-46d0-994f-310826879da4	TCGA-69-7973	TCGA-LUAD	female	1969	white	not hispanic or latino	--	not reported	not reported	Adenocarcinoma with mixed subtypes	stage ib	15355	alive	8255-03-01	--	--	--	not reported	Middle lobe, lung	-15355	not reported	not reported	Middle lobe, lung	230	--	--	--
66ed89f6-8ba2-49d0-af0f-4b6ebf2381bf	TCGA-44-3919	TCGA-LUAD	female	1939	white	not hispanic or latino	--	not reported	not reported	Adenocarcinoma, NOS	stage ia	26081	dead	8140-03-01	1026	--	--	not reported	Upper lobe, lung	-26081	not reported	not reported	Upper lobe, lung	190	--	--	--
f77b6930-a1ce-446e-a15d-c018cbbecfee	TCGA-49-4510	TCGA-LUAD	female	1950	black or african american	not hispanic or latino	2003	not reported	not reported	Adenocarcinoma, NOS	stage iib	18762	dead	8140-03-01	896	--	--	not reported	Upper lobe, lung	-18762	not reported	not reported	Upper lobe, lung	--	--	--	--
33c71ead-4c2a-476d-85ef-885dbbfc2cbd	TCGA-44-6774	TCGA-LUAD	female	1955	white	not hispanic or latino	--	not reported	not reported	Adenocarcinoma, NOS	stage iiia	20462	alive	8140-03-01	--	--	--	not reported	Lower lobe, lung	-20462	not reported	not reported	Lower lobe, lung	658	--	--	--
6ee9caec-65ac-46db-9426-ffaa31967ae2	TCGA-95-8494	TCGA-LUAD	male	1945	white	not hispanic or latino	--	not reported	not reported	Adenocarcinoma, NOS	stage iia	24773	alive	8140-03-01	--	--	--	not reported	Middle lobe, lung	-24773	not reported	not reported	Middle lobe, lung	84	--	--	--
34040b83-7e8a-4264-a551-b16621843e28	TCGA-05-4244	TCGA-LUAD	male	1939	not reported	not reported	--	not reported	not reported	Adenocarcinoma, NOS	stage iv	25752	alive	8140-03-01	--	--	--	not reported	Lower lobe, lung	-25752	not reported	not reported	Lower lobe, lung	0	--	--	--
bebd0025-74e2-451b-93b3-86f82df43573	TCGA-MP-A4TE	TCGA-LUAD	male	1954	white	not hispanic or latino	2012	not reported	not reported	Adenocarcinoma, NOS	stage iia	20627	dead	8140-03-01	896	--	--	not reported	Lower lobe, lung	-20627	not reported	not reported	Lower lobe, lung	--	--	--	--
9e22a3af-7f28-4757-8684-ed64a2a27ad1	TCGA-95-A4VP	TCGA-LUAD	female	1946	white	not reported	--	not reported	not reported	Acinar cell carcinoma	stage iiia	24130	alive	8550-03-01	--	--	--	not reported	Lower lobe, lung	-24130	not reported	not reported	Lower lobe, lung	605	--	--	--
c583fdd1-8cd2-4c15-a23e-0644261f65da	TCGA-64-1681	TCGA-LUAD	female	1947	white	not hispanic or latino	2011	not reported	not reported	Adenocarcinoma, NOS	stage ia	22525	dead	8140-03-01	1167	--	--	not reported	Lung, NOS	-22525	not reported	not reported	Lung, NOS	--	--	--	--
6c3655ca-8ae7-4ad7-b3e4-0c3ec293fba7	TCGA-49-4490	TCGA-LUAD	female	1948	white	not hispanic or latino	1994	not reported	not reported	Adenocarcinoma, NOS	stage iiia	16634	dead	8140-03-01	385	--	--	not reported	Upper lobe, lung	-16634	not reported	not reported	Upper lobe, lung	--	--	--	--
7e7f089c-25f7-4e14-aed5-d741047b9e42	TCGA-86-8359	TCGA-LUAD	male	1960	white	not hispanic or latino	--	not reported	not reported	Adenocarcinoma, NOS	stage iiia	19088	dead	8140-03-01	444	--	--	not reported	Lower lobe, lung	-19088	not reported	not reported	Lower lobe, lung	26	--	--	--
d5326429-9805-47f9-97b0-fbda658e3f01	TCGA-91-6840	TCGA-LUAD	female	1952	white	not hispanic or latino	--	not reported	not reported	Adenocarcinoma, NOS	stage ia	21854	alive	8140-03-01	--	--	--	not reported	Upper lobe, lung	-21854	not reported	not reported	Upper lobe, lung	372	--	--	--
9a9bd705-1ef1-4a6c-bb1e-bdd346dc01c0	TCGA-55-8203	TCGA-LUAD	female	1942	white	not hispanic or latino	--	not reported	not reported	Adenocarcinoma, NOS	stage ia	25477	alive	8140-03-01	--	--	--	not reported	Lower lobe, lung	-25477	not reported	not reported	Lower lobe, lung	547	--	--	--
258a3a41-211b-4c66-bd3b-ef03014a6967	TCGA-38-A44F	TCGA-LUAD	male	1932	white	not hispanic or latino	--	not reported	not reported	Acinar cell carcinoma	stage ib	29534	alive	8550-03-01	--	--	--	not reported	Upper lobe, lung	-29534	not reported	not reported	Upper lobe, lung	133	--	--	--
42259aa6-c9f5-4309-a956-dbf930312f44	TCGA-NJ-A4YP	TCGA-LUAD	male	1959	white	not hispanic or latino	--	not reported	not reported	Adenocarcinoma with mixed subtypes	stage ib	19106	alive	8255-03-01	--	--	--	not reported	Lower lobe, lung	-19106	not reported	not reported	Lower lobe, lung	50	--	--	--
e10568fe-0436-43f2-9f0f-48f9903868c4	TCGA-50-6593	TCGA-LUAD	female	1959	white	not hispanic or latino	2008	not reported	not reported	Adenocarcinoma with mixed subtypes	stage iiia	18152	dead	8255-03-01	336	--	--	not reported	Upper lobe, lung	-18152	not reported	not reported	Upper lobe, lung	--	--	--	--
44218b35-219c-4ad9-a01e-fde14067c4c0	TCGA-78-7633	TCGA-LUAD	male	1942	white	not reported	--	not reported	not reported	Adenocarcinoma with mixed subtypes	stage ib	24713	dead	8255-03-01	1528	--	--	not reported	Upper lobe, lung	-24713	not reported	not reported	Upper lobe, lung	994	--	--	--
78ae716b-0ca5-4c01-a053-d41288385fcd	TCGA-75-5122	TCGA-LUAD	male	--	not reported	not reported	--	not reported	not reported	Adenocarcinoma, NOS	stage ib	--	dead	8140-03-01	--	--	--	not reported	Upper lobe, lung	--	not reported	not reported	Upper lobe, lung	--	--	--	--
055e9a43-3c00-4110-a303-e4407676bec0	TCGA-55-7576	TCGA-LUAD	male	1957	black or african american	not hispanic or latino	--	not reported	not reported	Adenocarcinoma, NOS	stage ib	19917	alive	8140-03-01	--	--	--	not reported	Upper lobe, lung	-19917	not reported	not reported	Upper lobe, lung	670	--	--	--
dbd5b0de-94c9-45dd-afb3-6820a7ecaca2	TCGA-67-6215	TCGA-LUAD	female	1958	white	not hispanic or latino	--	not reported	not reported	Adenocarcinoma, NOS	stage ib	19310	alive	8140-03-01	--	--	--	not reported	Lower lobe, lung	-19310	not reported	not reported	Lower lobe, lung	174	--	--	--
742e0e32-25b5-4d41-8bf5-364b571cfd93	TCGA-62-8394	TCGA-LUAD	female	1943	white	not hispanic or latino	2008	not reported	not reported	Adenocarcinoma with mixed subtypes	stage iiib	23758	dead	8255-03-01	139	--	--	not reported	Lower lobe, lung	-23758	not reported	not reported	Lower lobe, lung	--	--	--	--
8d0736fe-261c-445c-bfd2-a3ea3ceaf367	TCGA-55-6971	TCGA-LUAD	female	1951	white	not reported	--	not reported	not reported	Adenocarcinoma, NOS	stage ib	21734	alive	8140-03-01	--	--	--	not reported	Lower lobe, lung	-21734	not reported	not reported	Lower lobe, lung	1400	--	--	--
079ae0b3-b64b-4b8e-ab7d-225b8046568c	TCGA-86-7954	TCGA-LUAD	female	1943	white	not hispanic or latino	--	not reported	not reported	Bronchiolo-alveolar adenocarcinoma, NOS	stage ib	25062	alive	8250-03-01	--	--	--	not reported	Lower lobe, lung	-25062	not reported	not reported	Lower lobe, lung	605	--	--	--
0d66bf6c-eed0-4726-bd5b-3bf6d610b4e0	TCGA-50-6597	TCGA-LUAD	female	1928	white	not hispanic or latino	--	not reported	not reported	Adenocarcinoma, NOS	stage ib	29195	dead	8140-03-01	1268	--	--	not reported	Lower lobe, lung	-29195	not reported	not reported	Lower lobe, lung	1015	--	--	--
63bd2175-4b7c-44c9-aef3-9efc8f79837b	TCGA-05-5429	TCGA-LUAD	male	1950	not reported	not reported	--	not reported	not reported	Adenocarcinoma, NOS	stage iiia	22066	dead	8140-03-01	275	--	--	not reported	Lung, NOS	-22066	not reported	not reported	Lung, NOS	30	--	--	--
3e635902-5310-4406-8b4d-a238ce382639	TCGA-67-4679	TCGA-LUAD	male	1940	white	not hispanic or latino	--	not reported	not reported	Adenocarcinoma, NOS	not reported	25202	alive	8140-03-01	--	--	--	not reported	Lower lobe, lung	-25202	not reported	not reported	Lower lobe, lung	448	--	--	--
84c3ba70-afa7-4b69-be69-7ec8d6022c56	TCGA-99-8025	TCGA-LUAD	female	1938	black or african american	not hispanic or latino	--	not reported	not reported	Adenocarcinoma, NOS	stage iiia	26634	alive	8140-03-01	--	--	--	not reported	Upper lobe, lung	-26634	not reported	not reported	Upper lobe, lung	1060	--	--	--
44dec838-b653-42a7-a58b-a1fd232cd68c	TCGA-05-4422	TCGA-LUAD	male	1940	not reported	not reported	--	not reported	not reported	Adenocarcinoma with mixed subtypes	stage ib	24837	alive	8255-03-01	--	--	--	not reported	Lower lobe, lung	-24837	not reported	not reported	Lower lobe, lung	365	--	--	--
42ca54fc-c1ae-41cd-bca1-7fe9810db460	TCGA-44-2656	TCGA-LUAD	male	1950	white	not hispanic or latino	--	not reported	not reported	Adenocarcinoma, NOS	stage ib	21766	alive	8140-03-01	--	--	--	not reported	Upper lobe, lung	-21766	not reported	not reported	Upper lobe, lung	1429	--	--	--
daf0e08e-1738-43f8-874a-b37d79cbe3a7	TCGA-78-7536	TCGA-LUAD	male	1932	white	not reported	2001	not reported	not reported	Adenocarcinoma, NOS	stage iiia	25558	dead	8140-03-01	244	--	--	not reported	Upper lobe, lung	-25558	not reported	not reported	Upper lobe, lung	--	--	--	--
497cc506-03fe-4ffa-860b-5a12adb1bc7d	TCGA-50-8460	TCGA-LUAD	male	1938	white	not hispanic or latino	--	not reported	not reported	Papillary adenocarcinoma, NOS	stage ia	27270	alive	8260-03-01	--	--	--	not reported	Upper lobe, lung	-27270	not reported	not reported	Upper lobe, lung	829	--	--	--
25d4ea9e-f773-4f11-bac9-64efdad73211	TCGA-83-5908	TCGA-LUAD	female	1950	white	not hispanic or latino	--	not reported	not reported	Adenocarcinoma, NOS	stage ia	21760	alive	8140-03-01	--	--	--	not reported	Upper lobe, lung	-21760	not reported	not reported	Upper lobe, lung	824	--	--	--
552712d3-da16-441e-ba93-11810793d598	TCGA-69-8255	TCGA-LUAD	male	1940	white	hispanic or latino	--	not reported	not reported	Solid carcinoma, NOS	stage ia	26289	alive	8230-03-01	--	--	--	not reported	Upper lobe, lung	-26289	not reported	not reported	Upper lobe, lung	129	--	--	--
781f40c9-c099-4c96-8269-ebe2a449c93d	TCGA-78-8660	TCGA-LUAD	male	1936	not reported	not reported	2005	not reported	not reported	Adenocarcinoma, NOS	stage iib	25422	dead	8140-03-01	321	--	--	not reported	Lower lobe, lung	-25422	not reported	not reported	Lower lobe, lung	--	--	--	--
f3f024c2-52f1-400e-946c-398f5b72e6dc	TCGA-50-5941	TCGA-LUAD	female	1955	white	not reported	--	not reported	not reported	Adenocarcinoma, NOS	stage iiia	20350	alive	8140-03-01	--	--	--	not reported	Upper lobe, lung	-20350	not reported	not reported	Upper lobe, lung	1474	--	--	--
d721bfe0-90e3-415e-b9f3-1a270efa5fbb	TCGA-49-4488	TCGA-LUAD	female	1918	white	not hispanic or latino	1994	not reported	not reported	Adenocarcinoma, NOS	stage ia	27332	dead	8140-03-01	869	--	--	not reported	Lower lobe, lung	-27332	not reported	not reported	Lower lobe, lung	--	--	--	--
851867cb-9ad0-4fdf-ac75-9bb0427ad440	TCGA-44-A479	TCGA-LUAD	female	1939	black or african american	not hispanic or latino	--	not reported	not reported	Adenocarcinoma, NOS	stage ib	27024	alive	8140-03-01	--	--	--	not reported	Upper lobe, lung	-27024	not reported	not reported	Upper lobe, lung	486	--	--	--
fa0c7392-d485-41ac-bf7e-244a528209ae	TCGA-50-5044	TCGA-LUAD	female	1930	white	not hispanic or latino	2003	not reported	not reported	Adenocarcinoma, NOS	stage iiib	26567	dead	8140-03-01	624	--	--	not reported	Lower lobe, lung	-26567	not reported	not reported	Lower lobe, lung	--	--	--	--
c1a01e8c-1f7e-4e24-bfad-90b73f88e992	TCGA-78-7160	TCGA-LUAD	male	1947	white	not reported	--	not reported	not reported	Adenocarcinoma with mixed subtypes	stage iv	22385	dead	8255-03-01	697	--	--	not reported	Lower lobe, lung	-22385	not reported	not reported	Lower lobe, lung	678	--	--	--
df576520-a6b6-4c9b-8d06-3f59cc5342fd	TCGA-75-7030	TCGA-LUAD	male	--	not reported	not reported	--	not reported	not reported	Adenocarcinoma, NOS	stage iib	--	alive	8140-03-01	--	--	--	not reported	Lower lobe, lung	--	not reported	not reported	Lower lobe, lung	--	--	--	--
31458638-e19c-43e5-ab13-9c64b3b3681d	TCGA-S2-AA1A	TCGA-LUAD	female	1945	black or african american	not hispanic or latino	--	not reported	not reported	Bronchio-alveolar carcinoma, mucinous	stage ia	24903	alive	8253-03-01	--	--	--	not reported	Upper lobe, lung	-24903	not reported	not reported	Upper lobe, lung	513	--	--	--
f61d599a-43bd-4743-9568-678317e75955	TCGA-44-A47F	TCGA-LUAD	male	1938	white	not hispanic or latino	--	not reported	not reported	Adenocarcinoma, NOS	stage iib	27122	alive	8140-03-01	--	--	--	not reported	Upper lobe, lung	-27122	not reported	not reported	Upper lobe, lung	337	--	--	--
5f4934be-eee3-40e1-8838-38103badc898	TCGA-MP-A4T6	TCGA-LUAD	female	1929	white	not hispanic or latino	2009	not reported	not reported	Adenocarcinoma, NOS	stage iiia	27993	dead	8140-03-01	1790	--	--	not reported	Lower lobe, lung	-27993	not reported	not reported	Lower lobe, lung	--	--	--	--
36ad7fc7-0cc1-4f01-aef1-f89b3cb4feac	TCGA-67-3774	TCGA-LUAD	female	1936	white	not hispanic or latino	--	not reported	not reported	Adenocarcinoma, NOS	stage ib	26704	alive	8140-03-01	--	--	--	not reported	Lower lobe, lung	-26704	not reported	not reported	Lower lobe, lung	385	--	--	--
32d9935a-f5cd-43b3-88bd-09e6e2b9090d	TCGA-55-A48X	TCGA-LUAD	female	1949	white	not hispanic or latino	--	not reported	not reported	Adenocarcinoma, NOS	stage iia	23341	alive	8140-03-01	--	--	--	not reported	Lower lobe, lung	-23341	not reported	not reported	Lower lobe, lung	689	--	--	--
22302e92-fdfa-462a-9249-efdaa26ee5ed	TCGA-44-6144	TCGA-LUAD	male	1953	white	not hispanic or latino	--	not reported	not reported	Adenocarcinoma, NOS	stage ia	21283	alive	8140-03-01	--	--	--	not reported	Upper lobe, lung	-21283	not reported	not reported	Upper lobe, lung	723	--	--	--
8c695c24-e7f9-449a-9258-a1bc8a33bf9a	TCGA-97-8174	TCGA-LUAD	male	1944	white	not hispanic or latino	2011	not reported	not reported	Papillary adenocarcinoma, NOS	stage iia	24725	dead	8260-03-01	164	--	--	not reported	Upper lobe, lung	-24725	not reported	not reported	Upper lobe, lung	--	--	--	--
d6e274a0-6425-437b-bc07-1225be7808d5	TCGA-55-6969	TCGA-LUAD	male	1952	white	not reported	--	not reported	not reported	Adenocarcinoma, NOS	stage ib	19270	alive	8140-03-01	--	--	--	not reported	Upper lobe, lung	-19270	not reported	not reported	Upper lobe, lung	1239	--	--	--
a815619f-dbba-469f-a1f7-dfbd51cd86c5	TCGA-L9-A50W	TCGA-LUAD	male	1937	black or african american	not hispanic or latino	--	not reported	not reported	Adenocarcinoma with mixed subtypes	stage iia	27414	dead	8255-03-01	442	--	--	not reported	Lower lobe, lung	-27414	not reported	not reported	Lower lobe, lung	266	--	--	--
0d980584-4484-4063-8243-c3cd67f6f588	TCGA-91-A4BD	TCGA-LUAD	male	1934	white	not hispanic or latino	--	not reported	not reported	Adenocarcinoma, NOS	stage iia	28544	alive	8140-03-01	--	--	--	not reported	Lower lobe, lung	-28544	not reported	not reported	Lower lobe, lung	603	--	--	--
81a0b2ff-a3d3-41bb-9ce6-765e6ae894af	TCGA-64-1679	TCGA-LUAD	female	1949	white	not hispanic or latino	--	not reported	not reported	Adenocarcinoma, NOS	stage iiia	21310	alive	8140-03-01	--	--	--	not reported	Upper lobe, lung	-21310	not reported	not reported	Upper lobe, lung	2488	--	--	--
4addf05f-3668-4b3f-a17f-c0227329ca52	TCGA-05-4249	TCGA-LUAD	male	1940	not reported	not reported	--	not reported	not reported	Adenocarcinoma, NOS	stage ib	24532	alive	8140-03-01	--	--	--	not reported	Lower lobe, lung	-24532	not reported	not reported	Lower lobe, lung	1523	--	--	--
127bf818-f7e5-46b5-a9de-39f6d96b8b83	TCGA-38-4629	TCGA-LUAD	male	1935	white	not hispanic or latino	2005	not reported	not reported	Adenocarcinoma, NOS	stage iib	25104	dead	8140-03-01	864	--	--	not reported	Upper lobe, lung	-25104	not reported	not reported	Upper lobe, lung	--	--	--	--
16e64a1e-08b0-4c27-8c69-fa64551f8ca4	TCGA-78-8662	TCGA-LUAD	female	1947	not reported	not reported	2009	not reported	not reported	Adenocarcinoma, NOS	stage ib	19563	dead	8140-03-01	3361	--	--	not reported	Upper lobe, lung	-19563	not reported	not reported	Upper lobe, lung	--	--	--	--
2c03141e-a0bd-4e8d-91e4-9744d139ccce	TCGA-NJ-A4YI	TCGA-LUAD	female	1922	white	not reported	2009	not reported	not reported	Acinar cell carcinoma	stage iiia	31867	dead	8550-03-01	4	--	--	not reported	Upper lobe, lung	-31867	not reported	not reported	Upper lobe, lung	--	--	--	--
345aef28-d49b-491b-a337-b1ac55c37d35	TCGA-97-A4M2	TCGA-LUAD	male	1946	white	not hispanic or latino	--	not reported	not reported	Adenocarcinoma with mixed subtypes	stage ia	24313	alive	8255-03-01	--	--	--	not reported	Middle lobe, lung	-24313	not reported	not reported	Middle lobe, lung	624	--	--	--
1ab7ad70-0f80-41d8-8efa-3baebc8223cc	TCGA-64-1680	TCGA-LUAD	male	1944	white	not hispanic or latino	--	not reported	not reported	Adenocarcinoma with mixed subtypes	stage iv	23267	alive	8255-03-01	--	--	--	not reported	Overlapping lesion of lung	-23267	not reported	not reported	Overlapping lesion of lung	1126	--	--	--
fcfe0b53-dfc1-42fa-9efc-2b2ff259297e	TCGA-97-7937	TCGA-LUAD	male	1946	white	not hispanic or latino	--	not reported	not reported	Micropapillary carcinoma, NOS	stage ib	23919	alive	8265-03-01	--	--	--	not reported	Upper lobe, lung	-23919	not reported	not reported	Upper lobe, lung	564	--	--	--
e51f717f-72e8-400e-9f35-fc5dc32fdf71	TCGA-80-5611	TCGA-LUAD	male	--	not reported	not reported	--	not reported	not reported	Solid carcinoma, NOS	stage ib	--	alive	8230-03-01	--	--	--	not reported	Upper lobe, lung	--	not reported	not reported	Upper lobe, lung	2595	--	--	--
2923e404-38f2-437a-b57e-23401fbe0273	TCGA-86-8279	TCGA-LUAD	male	1965	white	not hispanic or latino	--	not reported	not reported	Adenocarcinoma, NOS	stage iia	17032	alive	8140-03-01	--	--	--	not reported	Upper lobe, lung	-17032	not reported	not reported	Upper lobe, lung	949	--	--	--
ab9e6815-4d13-44db-93e5-553eb4f5bc95	TCGA-44-7662	TCGA-LUAD	male	1950	white	not hispanic or latino	--	not reported	not reported	Adenocarcinoma, NOS	stage ib	22543	alive	8140-03-01	--	--	--	not reported	Upper lobe, lung	-22543	not reported	not reported	Upper lobe, lung	218	--	--	--
98ee294a-46ed-4572-bdd4-a932c3498a25	TCGA-MP-A4TA	TCGA-LUAD	female	1931	white	not hispanic or latino	2008	not reported	not reported	Adenocarcinoma, NOS	stage ia	27513	dead	8140-03-01	950	--	--	not reported	Upper lobe, lung	-27513	not reported	not reported	Upper lobe, lung	--	--	--	--
d344dae0-adf4-4697-b703-7690c13d8331	TCGA-95-A4VK	TCGA-LUAD	female	1938	white	not hispanic or latino	--	not reported	not reported	Adenocarcinoma with mixed subtypes	stage iiia	27040	alive	8255-03-01	--	--	--	not reported	Upper lobe, lung	-27040	not reported	not reported	Upper lobe, lung	651	--	--	--
c0fdb152-25d2-404b-bec7-a43ece381f5b	TCGA-91-7771	TCGA-LUAD	male	1949	white	not hispanic or latino	--	not reported	not reported	Adenocarcinoma, NOS	stage iib	22926	alive	8140-03-01	--	--	--	not reported	Upper lobe, lung	-22926	not reported	not reported	Upper lobe, lung	492	--	--	--
11c2e619-8aeb-4f86-b03b-78f9a8099263	TCGA-97-8179	TCGA-LUAD	male	1940	white	not hispanic or latino	--	not reported	not reported	Acinar cell carcinoma	stage ia	26305	alive	8550-03-01	--	--	--	not reported	Upper lobe, lung	-26305	not reported	not reported	Upper lobe, lung	435	--	--	--
58babefe-7e81-4594-ba29-50d1de92a5ab	TCGA-75-6207	TCGA-LUAD	male	--	not reported	not reported	--	not reported	not reported	Adenocarcinoma, NOS	stage iiia	--	dead	8140-03-01	--	--	--	not reported	Lung, NOS	--	not reported	not reported	Lung, NOS	--	--	--	--
6092bd5c-e97c-4a77-a4ad-c87623b17507	TCGA-97-7547	TCGA-LUAD	female	1940	white	not hispanic or latino	--	not reported	not reported	Papillary adenocarcinoma, NOS	stage ib	24737	alive	8260-03-01	--	--	--	not reported	Upper lobe, lung	-24737	not reported	not reported	Upper lobe, lung	1965	--	--	--
d2824e6d-3784-45c2-9b0f-52b17356b5da	TCGA-75-5147	TCGA-LUAD	female	--	not reported	not reported	--	not reported	not reported	Bronchiolo-alveolar carcinoma, non-mucinous	stage ib	--	alive	8252-03-01	--	--	--	not reported	Upper lobe, lung	--	not reported	not reported	Upper lobe, lung	1333	--	--	--
656a5eb4-e4a5-4d21-a800-3586f4d6588b	TCGA-91-8496	TCGA-LUAD	female	1948	white	not hispanic or latino	--	not reported	not reported	Bronchiolo-alveolar carcinoma, non-mucinous	stage ib	23358	alive	8252-03-01	--	--	--	not reported	Lower lobe, lung	-23358	not reported	not reported	Lower lobe, lung	505	--	--	--
27fceec1-3298-4cdd-a4e6-8f5cf34604f0	TCGA-44-5643	TCGA-LUAD	male	1957	black or african american	not hispanic or latino	--	not reported	not reported	Adenocarcinoma, NOS	stage iiia	19426	alive	8140-03-01	--	--	--	not reported	Lower lobe, lung	-19426	not reported	not reported	Lower lobe, lung	1013	--	--	--
e8060c45-451d-4779-9584-f284db47e63e	TCGA-78-7148	TCGA-LUAD	male	1930	white	not reported	2002	not reported	not reported	Adenocarcinoma with mixed subtypes	stage iib	25990	dead	8255-03-01	626	--	--	not reported	Upper lobe, lung	-25990	not reported	not reported	Upper lobe, lung	--	--	--	--
12c27db5-db2f-48dc-a2ca-9557b951f43e	TCGA-97-8176	TCGA-LUAD	male	1949	white	not hispanic or latino	--	not reported	not reported	Acinar cell carcinoma	stage iiia	23170	dead	8550-03-01	468	--	--	not reported	Lower lobe, lung	-23170	not reported	not reported	Lower lobe, lung	252	--	--	--
dd46c83e-6551-485b-b935-f3beed891244	TCGA-55-7815	TCGA-LUAD	male	1935	not reported	not reported	--	not reported	not reported	Adenocarcinoma, NOS	stage ib	28119	alive	8140-03-01	--	--	--	not reported	Lower lobe, lung	-28119	not reported	not reported	Lower lobe, lung	773	--	--	--
1f1df7ea-00b9-4432-86de-da773d1451e5	TCGA-55-8511	TCGA-LUAD	female	1939	white	not hispanic or latino	--	not reported	not reported	Adenocarcinoma, NOS	stage ib	26986	alive	8140-03-01	--	--	--	not reported	Upper lobe, lung	-26986	not reported	not reported	Upper lobe, lung	552	--	--	--
368e23f0-e573-4547-bf5a-14080baf737b	TCGA-50-5930	TCGA-LUAD	male	1954	white	not hispanic or latino	2001	not reported	not reported	Adenocarcinoma with mixed subtypes	stage iiia	17238	dead	8255-03-01	282	--	--	not reported	Lower lobe, lung	-17238	not reported	not reported	Lower lobe, lung	--	--	--	--
2f1a4b16-104c-40eb-8114-8245847bb716	TCGA-86-8585	TCGA-LUAD	male	1955	white	not hispanic or latino	--	not reported	not reported	Solid carcinoma, NOS	stage ib	20918	alive	8230-03-01	--	--	--	not reported	Upper lobe, lung	-20918	not reported	not reported	Upper lobe, lung	353	--	--	--
34d8e84e-c3e1-417d-8b9b-8563d9fa0f8e	TCGA-86-8055	TCGA-LUAD	male	1932	white	not hispanic or latino	--	not reported	not reported	Adenocarcinoma, NOS	stage iia	29124	dead	8140-03-01	124	--	--	not reported	Upper lobe, lung	-29124	not reported	not reported	Upper lobe, lung	10	--	--	--
06fe7f3e-4edd-4150-981c-93787ea19b39	TCGA-55-8615	TCGA-LUAD	male	1945	white	not hispanic or latino	--	not reported	not reported	Adenocarcinoma, NOS	stage iiia	24786	alive	8140-03-01	--	--	--	not reported	Middle lobe, lung	-24786	not reported	not reported	Middle lobe, lung	446	--	--	--
8a16ddb3-4861-4128-bed9-0b1f94fe8cf7	TCGA-64-1677	TCGA-LUAD	female	1928	white	not hispanic or latino	2006	not reported	not reported	Adenocarcinoma, NOS	stage iiia	28482	dead	8140-03-01	628	--	--	not reported	Lower lobe, lung	-28482	not reported	not reported	Lower lobe, lung	--	--	--	--
7b0622ab-63ea-483f-ae40-d3ea587bdbba	TCGA-78-7156	TCGA-LUAD	male	1944	white	not reported	2008	not reported	not reported	Adenocarcinoma with mixed subtypes	stage iv	22720	dead	8255-03-01	976	--	--	not reported	Lung, NOS	-22720	not reported	not reported	Lung, NOS	--	--	--	--
9759bf3a-74ff-433f-99bb-f9406f222ed2	TCGA-99-8028	TCGA-LUAD	female	1961	black or african american	not hispanic or latino	--	not reported	not reported	Adenocarcinoma, NOS	stage ia	18542	alive	8140-03-01	--	--	--	not reported	Upper lobe, lung	-18542	not reported	not reported	Upper lobe, lung	1118	--	--	--
ab8d7f84-dd71-42c7-9471-4db967a9c89c	TCGA-50-6673	TCGA-LUAD	female	1920	white	not reported	2004	not reported	not reported	Adenocarcinoma, NOS	stage i	30689	dead	8140-03-01	22	--	--	not reported	Upper lobe, lung	-30689	not reported	not reported	Upper lobe, lung	--	--	--	--
f1985735-a188-4567-a88a-530f9b80291b	TCGA-38-4630	TCGA-LUAD	female	1925	white	not hispanic or latino	2002	not reported	not reported	Papillary adenocarcinoma, NOS	stage ib	27667	dead	8260-03-01	1073	--	--	not reported	Upper lobe, lung	-27667	not reported	not reported	Upper lobe, lung	--	--	--	--
67dbe286-edb3-4d07-8f74-9e5254f01945	TCGA-55-7994	TCGA-LUAD	male	1930	white	not hispanic or latino	--	not reported	not reported	Adenocarcinoma, NOS	stage iib	29858	alive	8140-03-01	--	--	--	not reported	Upper lobe, lung	-29858	not reported	not reported	Upper lobe, lung	603	--	--	--
5510ad32-62fd-4adc-964a-ae4e997c2f4b	TCGA-55-8620	TCGA-LUAD	male	1952	white	not hispanic or latino	--	not reported	not reported	Adenocarcinoma, NOS	stage iv	22091	dead	8140-03-01	375	--	--	not reported	Upper lobe, lung	-22091	not reported	not reported	Upper lobe, lung	66	--	--	--
9b132e4f-7e35-4cc5-8711-43ad62b906d0	TCGA-50-6591	TCGA-LUAD	female	1944	white	not hispanic or latino	2007	not reported	not reported	Adenocarcinoma, NOS	stage iv	23067	dead	8140-03-01	119	--	--	not reported	Lower lobe, lung	-23067	not reported	not reported	Lower lobe, lung	--	--	--	--
9a50e7e4-831d-489f-87d2-979e987561cc	TCGA-05-4384	TCGA-LUAD	male	1943	not reported	not reported	--	not reported	not reported	Adenocarcinoma with mixed subtypes	stage iiia	24411	alive	8255-03-01	--	--	--	not reported	Lower lobe, lung	-24411	not reported	not reported	Lower lobe, lung	426	--	--	--
93766482-2f20-4c8f-bbd8-bdd203c37d5a	TCGA-75-5126	TCGA-LUAD	female	--	not reported	not reported	--	not reported	not reported	Papillary adenocarcinoma, NOS	stage iiia	--	alive	8260-03-01	--	--	--	not reported	Upper lobe, lung	--	not reported	not reported	Upper lobe, lung	--	--	--	--
68b86559-38b2-41f2-b66e-c3c2b628b14d	TCGA-44-4112	TCGA-LUAD	female	1950	white	not hispanic or latino	--	not reported	not reported	Adenocarcinoma, NOS	stage ib	22106	dead	8140-03-01	808	--	--	not reported	Upper lobe, lung	-22106	not reported	not reported	Upper lobe, lung	722	--	--	--
2fabeb98-05e3-4f55-97f5-fbc675e25a3d	TCGA-62-8398	TCGA-LUAD	male	1952	white	not hispanic or latino	2008	not reported	not reported	Adenocarcinoma with mixed subtypes	stage iiia	20197	dead	8255-03-01	444	--	--	not reported	Lower lobe, lung	-20197	not reported	not reported	Lower lobe, lung	--	--	--	--
3e1df30f-744a-41e9-a169-7dbbff66622e	TCGA-69-7974	TCGA-LUAD	female	1957	white	not hispanic or latino	--	not reported	not reported	Adenocarcinoma with mixed subtypes	stage iiia	20021	alive	8255-03-01	--	--	--	not reported	Upper lobe, lung	-20021	not reported	not reported	Upper lobe, lung	184	--	--	--
d717fa33-3c91-4ced-89c6-79ff5542f04c	TCGA-38-4627	TCGA-LUAD	female	1939	white	not hispanic or latino	2006	not reported	not reported	Adenocarcinoma, NOS	stage iia	23510	dead	8140-03-01	1147	--	--	not reported	Upper lobe, lung	-23510	not reported	not reported	Upper lobe, lung	--	--	--	--
b266cbf5-80de-4473-b16f-08c502d365ca	TCGA-97-7941	TCGA-LUAD	female	1939	white	not hispanic or latino	--	not reported	not reported	Acinar cell carcinoma	stage ia	26298	alive	8550-03-01	--	--	--	not reported	Upper lobe, lung	-26298	not reported	not reported	Upper lobe, lung	484	--	--	--
c353f949-5f66-4a2c-b8f0-17be8bf19e0a	TCGA-78-7153	TCGA-LUAD	female	1938	white	not reported	--	not reported	not reported	Adenocarcinoma with mixed subtypes	stage ib	23922	alive	8255-03-01	--	--	--	not reported	Overlapping lesion of lung	-23922	not reported	not reported	Overlapping lesion of lung	3635	--	--	--
923b37e4-fcf7-46a0-8cb2-9139711fec7b	TCGA-55-7726	TCGA-LUAD	female	1939	white	not hispanic or latino	--	not reported	not reported	Adenocarcinoma, NOS	stage ia	26451	alive	8140-03-01	--	--	--	not reported	Lower lobe, lung	-26451	not reported	not reported	Lower lobe, lung	652	--	--	--
54a9cc9e-3eee-4caa-9f33-4ea64a2999ba	TCGA-53-7624	TCGA-LUAD	female	1968	white	hispanic or latino	2010	not reported	not reported	Adenocarcinoma, NOS	stage iv	14794	dead	8140-03-01	1043	--	--	not reported	Upper lobe, lung	-14794	not reported	not reported	Upper lobe, lung	--	--	--	--
7a111b4f-46e9-4e34-8024-0b9fdc5cbcd8	TCGA-MP-A4TH	TCGA-LUAD	female	1942	white	not hispanic or latino	--	not reported	not reported	Adenocarcinoma, NOS	stage ia	25759	alive	8140-03-01	--	--	--	not reported	Lower lobe, lung	-25759	not reported	not reported	Lower lobe, lung	741	--	--	--
0c0b610e-fe4c-406d-a5ed-5cc3b11dabf5	TCGA-44-6146	TCGA-LUAD	male	1946	white	not hispanic or latino	--	not reported	not reported	Mucinous adenocarcinoma	stage iib	23378	alive	8480-03-01	--	--	--	not reported	Lower lobe, lung	-23378	not reported	not reported	Lower lobe, lung	728	--	--	--
e0a19099-5d25-40df-ad73-6260df3a1b32	TCGA-05-5715	TCGA-LUAD	female	1941	not reported	not reported	--	not reported	not reported	Adenocarcinoma with mixed subtypes	stage ib	25383	alive	8255-03-01	--	--	--	not reported	Upper lobe, lung	-25383	not reported	not reported	Upper lobe, lung	62	--	--	--
875333ab-9048-462d-aaa2-693ad127e3cc	TCGA-38-4632	TCGA-LUAD	male	1956	black or african american	not hispanic or latino	2001	not reported	not reported	Adenocarcinoma, NOS	stage iv	15418	dead	8140-03-01	1357	--	--	not reported	Upper lobe, lung	-15418	not reported	not reported	Upper lobe, lung	--	--	--	--
86dac334-f30e-438e-810a-8e45f69dbb7e	TCGA-MP-A4TF	TCGA-LUAD	female	1952	white	not hispanic or latino	2010	not reported	not reported	Adenocarcinoma, NOS	stage iia	21387	dead	8140-03-01	336	--	--	not reported	Upper lobe, lung	-21387	not reported	not reported	Upper lobe, lung	--	--	--	--
ae39e358-08d7-4367-ae68-82b469e791e4	TCGA-73-4675	TCGA-LUAD	male	1951	white	not hispanic or latino	--	not reported	not reported	Adenocarcinoma, NOS	stage iiia	21614	dead	8140-03-01	922	--	--	not reported	Lower lobe, lung	-21614	not reported	not reported	Lower lobe, lung	40	--	--	--
595fc3ad-f603-421b-b130-52f1f617050b	TCGA-NJ-A4YF	TCGA-LUAD	female	1957	black or african american	not hispanic or latino	--	not reported	not reported	Adenocarcinoma with mixed subtypes	stage ia	18584	alive	8255-03-01	--	--	--	not reported	Upper lobe, lung	-18584	not reported	not reported	Upper lobe, lung	2161	--	--	--
f77cf4d3-9829-4fd3-95a1-b29aed9e94b8	TCGA-64-1678	TCGA-LUAD	female	1936	white	not hispanic or latino	--	not reported	not reported	Adenocarcinoma, NOS	not reported	25931	alive	8140-03-01	--	--	--	not reported	Middle lobe, lung	-25931	not reported	not reported	Middle lobe, lung	1189	--	--	--
bab335f9-b241-41a7-b107-79b9676b37b8	TCGA-55-8508	TCGA-LUAD	female	1952	black or african american	not hispanic or latino	--	not reported	not reported	Mucinous adenocarcinoma	stage iia	22159	alive	8480-03-01	--	--	--	not reported	Upper lobe, lung	-22159	not reported	not reported	Upper lobe, lung	617	--	--	--
7cce924f-12a1-4895-9866-5d4b1869dde6	TCGA-55-6970	TCGA-LUAD	female	1937	white	not reported	2005	not reported	not reported	Papillary adenocarcinoma, NOS	stage iiia	24773	dead	8260-03-01	464	--	--	not reported	Upper lobe, lung	-24773	not reported	not reported	Upper lobe, lung	--	--	--	--
927fc5e0-2c14-4c20-a49b-f10d8a1175c3	TCGA-L9-A8F4	TCGA-LUAD	female	1949	black or african american	not hispanic or latino	--	not reported	not reported	Adenocarcinoma, NOS	stage ib	23617	alive	8140-03-01	--	--	--	not reported	Upper lobe, lung	-23617	not reported	not reported	Upper lobe, lung	476	--	--	--
f587c9ab-2949-4410-80d6-a050865d48aa	TCGA-05-4405	TCGA-LUAD	female	1932	not reported	not reported	--	not reported	not reported	Adenocarcinoma with mixed subtypes	stage ib	27241	alive	8255-03-01	--	--	--	not reported	Lower lobe, lung	-27241	not reported	not reported	Lower lobe, lung	610	--	--	--
b87a5d92-4c09-48fe-bb08-b3c89a7c892e	TCGA-49-4514	TCGA-LUAD	female	1928	white	not reported	--	not reported	not reported	Papillary adenocarcinoma, NOS	stage ia	28908	alive	8260-03-01	--	--	--	not reported	Upper lobe, lung	-28908	not reported	not reported	Upper lobe, lung	1700	--	--	--
a1e65587-24c1-4b41-92a7-4e1f15fffd78	TCGA-49-4512	TCGA-LUAD	female	1938	white	not hispanic or latino	2009	not reported	not reported	Adenocarcinoma, NOS	stage iiia	25502	dead	8140-03-01	905	--	--	not reported	Middle lobe, lung	-25502	not reported	not reported	Middle lobe, lung	157	--	--	--
b86b1616-20a2-4300-8daa-03dcc9938215	TCGA-44-7659	TCGA-LUAD	male	1940	white	not hispanic or latino	--	not reported	not reported	Adenocarcinoma, NOS	stage ia	25730	alive	8140-03-01	--	--	--	not reported	Upper lobe, lung	-25730	not reported	not reported	Upper lobe, lung	691	--	--	--
9536e32d-2707-48d2-a36d-08c521665bb9	TCGA-91-6828	TCGA-LUAD	male	1941	white	not hispanic or latino	--	not reported	not reported	Adenocarcinoma, NOS	stage ia	25870	alive	8140-03-01	--	--	--	not reported	Lower lobe, lung	-25870	not reported	not reported	Lower lobe, lung	323	--	--	--
a3fd20b2-e001-44ab-9716-754e5ae70808	TCGA-55-8513	TCGA-LUAD	female	1935	white	not hispanic or latino	--	not reported	not reported	Mucinous adenocarcinoma	stage iib	28284	alive	8480-03-01	--	--	--	not reported	Lower lobe, lung	-28284	not reported	not reported	Lower lobe, lung	791	--	--	--
028e99e9-5b9a-4954-bb6e-6d4709a3cea8	TCGA-55-6986	TCGA-LUAD	female	1930	white	not reported	--	not reported	not reported	Bronchiolo-alveolar carcinoma, non-mucinous	stage ib	--	alive	8252-03-01	--	--	--	not reported	Lower lobe, lung	--	not reported	not reported	Lower lobe, lung	3261	--	--	--
d12b6930-9ae4-4fe7-ad69-d183135c91ab	TCGA-55-8091	TCGA-LUAD	male	1937	white	not hispanic or latino	--	not reported	not reported	Adenocarcinoma, NOS	stage ib	27385	alive	8140-03-01	--	--	--	not reported	Lower lobe, lung	-27385	not reported	not reported	Lower lobe, lung	600	--	--	--
5a2f8140-8f90-4e94-b703-5fa5aa96be7b	TCGA-91-6830	TCGA-LUAD	female	1937	white	not hispanic or latino	--	not reported	not reported	Adenocarcinoma, NOS	stage iia	23922	alive	8140-03-01	--	--	--	not reported	Upper lobe, lung	-23922	not reported	not reported	Upper lobe, lung	60	--	--	--
035c0b2b-c722-443b-8962-db4ee92c7532	TCGA-86-6851	TCGA-LUAD	female	1938	white	not hispanic or latino	--	not reported	not reported	Adenocarcinoma with mixed subtypes	stage iia	26808	alive	8255-03-01	--	--	--	not reported	Upper lobe, lung	-26808	not reported	not reported	Upper lobe, lung	179	--	--	--
6d96a298-be5a-4e14-afe8-ca4b6ca298d6	TCGA-44-8117	TCGA-LUAD	female	1957	white	not hispanic or latino	--	not reported	not reported	Adenocarcinoma, NOS	stage ib	19855	alive	8140-03-01	--	--	--	not reported	Upper lobe, lung	-19855	not reported	not reported	Upper lobe, lung	385	--	--	--
fe3eeeb6-0db4-46d7-a020-55604d474c12	TCGA-78-7167	TCGA-LUAD	male	1925	white	not reported	2009	not reported	not reported	Papillary adenocarcinoma, NOS	stage iv	28295	dead	8260-03-01	2681	--	--	not reported	Lung, NOS	-28295	not reported	not reported	Lung, NOS	--	--	--	--
362000e4-cf7c-48fc-93cc-8f5994b442ea	TCGA-55-A4DF	TCGA-LUAD	male	1924	white	not hispanic or latino	--	not reported	not reported	Adenocarcinoma, NOS	stage ia	32432	dead	8140-03-01	614	--	--	not reported	Lower lobe, lung	-32432	not reported	not reported	Lower lobe, lung	47	--	--	--
a8de1beb-6296-44eb-bd63-c603f70faaf3	TCGA-55-8614	TCGA-LUAD	male	1935	white	not hispanic or latino	--	not reported	not reported	Adenocarcinoma, NOS	stage ib	27924	alive	8140-03-01	--	--	--	not reported	Upper lobe, lung	-27924	not reported	not reported	Upper lobe, lung	536	--	--	--
46592b7b-6968-42a6-83af-0917c9f4a9a5	TCGA-78-7535	TCGA-LUAD	male	1955	white	not reported	2002	not reported	not reported	Adenocarcinoma, NOS	stage ib	16571	dead	8140-03-01	949	--	--	not reported	Upper lobe, lung	-16571	not reported	not reported	Upper lobe, lung	--	--	--	--
8b119d1c-6d21-4bbd-8a00-12da7b97d6c4	TCGA-05-5420	TCGA-LUAD	male	1941	not reported	not reported	--	not reported	not reported	Adenocarcinoma, NOS	stage iiia	24472	alive	8140-03-01	--	--	--	not reported	Lung, NOS	-24472	not reported	not reported	Lung, NOS	457	--	--	--
8e2aca86-7cba-4631-9f25-4d14219dbc6d	TCGA-86-A456	TCGA-LUAD	female	1934	asian	not hispanic or latino	--	not reported	not reported	Papillary adenocarcinoma, NOS	stage ia	28533	alive	8260-03-01	--	--	--	not reported	Upper lobe, lung	-28533	not reported	not reported	Upper lobe, lung	896	--	--	--
c2a1de2e-6451-4c95-8ce6-263f2b7e6eff	TCGA-44-6776	TCGA-LUAD	female	1945	white	not reported	--	not reported	not reported	Adenocarcinoma, NOS	stage ia	22150	alive	8140-03-01	--	--	--	not reported	Upper lobe, lung	-22150	not reported	not reported	Upper lobe, lung	2616	--	--	--
e499069b-a16a-49e9-941a-e3e9ea62af25	TCGA-62-A472	TCGA-LUAD	male	1941	white	not hispanic or latino	--	not reported	not reported	Adenocarcinoma, NOS	stage iib	25893	alive	8140-03-01	--	--	--	not reported	Lower lobe, lung	-25893	not reported	not reported	Lower lobe, lung	910	--	--	--
ccda26c1-a6d6-4317-8cf8-8a87e15ce12e	TCGA-44-2662	TCGA-LUAD	male	1944	white	not hispanic or latino	--	not reported	not reported	Adenocarcinoma, NOS	stage ib	24014	alive	8140-03-01	--	--	--	not reported	Upper lobe, lung	-24014	not reported	not reported	Upper lobe, lung	1280	--	--	--
2de1ba51-eae1-4a54-b7cd-d6d739fdc39d	TCGA-78-7149	TCGA-LUAD	male	1931	white	not reported	--	not reported	not reported	Adenocarcinoma with mixed subtypes	stage iiib	26285	alive	8255-03-01	--	--	--	not reported	Lower lobe, lung	-26285	not reported	not reported	Lower lobe, lung	3940	--	--	--
2efc156c-464a-4c2f-a854-39fefe32081c	TCGA-55-6987	TCGA-LUAD	male	1929	white	not hispanic or latino	--	not reported	not reported	Adenocarcinoma, NOS	stage ia	28382	alive	8140-03-01	--	--	--	not reported	Lower lobe, lung	-28382	not reported	not reported	Lower lobe, lung	2137	--	--	--
abab925c-bef3-4072-b9c4-40f808744593	TCGA-95-7944	TCGA-LUAD	male	1940	white	not hispanic or latino	--	not reported	not reported	Adenocarcinoma, NOS	stage ia	26003	alive	8140-03-01	--	--	--	not reported	Lower lobe, lung	-26003	not reported	not reported	Lower lobe, lung	377	--	--	--
793649e5-f479-4d64-8723-2ef488fe0fd9	TCGA-62-A46U	TCGA-LUAD	female	1936	white	not hispanic or latino	--	not reported	not reported	Adenocarcinoma with mixed subtypes	stage iib	25998	alive	8255-03-01	--	--	--	not reported	Lower lobe, lung	-25998	not reported	not reported	Lower lobe, lung	2067	--	--	--
009be09b-f9f6-43b7-8f45-4a648f8123ce	TCGA-67-3773	TCGA-LUAD	female	1925	white	not hispanic or latino	--	not reported	not reported	Adenocarcinoma, NOS	stage ib	30706	alive	8140-03-01	--	--	--	not reported	Lower lobe, lung	-30706	not reported	not reported	Lower lobe, lung	427	--	--	--
7b9479ff-23d6-4689-91f0-02efc94300f9	TCGA-44-A47A	TCGA-LUAD	female	1934	white	not hispanic or latino	--	not reported	not reported	Adenocarcinoma, NOS	stage ib	28782	alive	8140-03-01	--	--	--	not reported	Upper lobe, lung	-28782	not reported	not reported	Upper lobe, lung	466	--	--	--
f934ed41-090e-4313-bbc5-d1a4a9ed9ad7	TCGA-44-A4SS	TCGA-LUAD	male	1939	white	not hispanic or latino	--	not reported	not reported	Adenocarcinoma, NOS	stage ia	26991	alive	8140-03-01	--	--	--	not reported	Upper lobe, lung	-26991	not reported	not reported	Upper lobe, lung	415	--	--	--
349e6f38-2c67-4a69-a777-b9173a2a27cf	TCGA-44-6777	TCGA-LUAD	female	1921	white	not reported	2008	not reported	not reported	Adenocarcinoma, NOS	stage ib	31234	dead	8140-03-01	987	--	--	not reported	Upper lobe, lung	-31234	not reported	not reported	Upper lobe, lung	--	--	--	--
95fa64b0-91e1-4427-b81a-53c47a053563	TCGA-55-8205	TCGA-LUAD	female	1936	white	not hispanic or latino	--	not reported	not reported	Adenocarcinoma, NOS	stage iia	28063	alive	8140-03-01	--	--	--	not reported	Lower lobe, lung	-28063	not reported	not reported	Lower lobe, lung	599	--	--	--
765ad5a5-134b-4680-a6d4-1dd113dc47cc	TCGA-49-AAR4	TCGA-LUAD	male	1955	black or african american	not hispanic or latino	2008	not reported	not reported	Adenocarcinoma, NOS	stage iiia	18939	dead	8140-03-01	879	--	--	not reported	Upper lobe, lung	-18939	not reported	not reported	Upper lobe, lung	--	--	--	--
2cd8ea73-cb3f-4b17-9b97-fa12eb03b85b	TCGA-55-8299	TCGA-LUAD	female	1951	white	not hispanic or latino	--	not reported	not reported	Adenocarcinoma, NOS	stage ia	22626	dead	8140-03-01	469	--	--	not reported	Upper lobe, lung	-22626	not reported	not reported	Upper lobe, lung	216	--	--	--
e21e2af3-dc71-41fa-94ba-7a7929f47d90	TCGA-J2-A4AG	TCGA-LUAD	female	1946	white	not hispanic or latino	--	not reported	not reported	Adenocarcinoma, NOS	stage ia	24224	alive	8140-03-01	--	--	--	not reported	Upper lobe, lung	-24224	not reported	not reported	Upper lobe, lung	988	--	--	--
a214a959-3b21-4f25-a615-383cda7afdff	TCGA-55-8206	TCGA-LUAD	male	1956	white	not hispanic or latino	--	not reported	not reported	Adenocarcinoma, NOS	stage ia	20690	alive	8140-03-01	--	--	--	not reported	Upper lobe, lung	-20690	not reported	not reported	Upper lobe, lung	888	--	--	--
86faf16c-56fd-4b7b-a6b2-b4c83bec93e1	TCGA-78-7161	TCGA-LUAD	female	1942	white	not reported	--	not reported	not reported	Adenocarcinoma with mixed subtypes	stage iib	25294	dead	8255-03-01	291	--	--	not reported	Upper lobe, lung	-25294	not reported	not reported	Upper lobe, lung	215	--	--	--
4cd3d483-2283-4c6a-a57a-444216119d34	TCGA-49-6761	TCGA-LUAD	female	1941	white	not hispanic or latino	--	not reported	not reported	Adenocarcinoma, NOS	stage iiia	24849	alive	8140-03-01	--	--	--	not reported	Upper lobe, lung	-24849	not reported	not reported	Upper lobe, lung	354	--	--	--
722d6818-f1cb-49f4-b68a-fd0a31304681	TCGA-05-4402	TCGA-LUAD	female	1950	not reported	not reported	2007	not reported	not reported	Adenocarcinoma with mixed subtypes	stage iv	20819	dead	8255-03-01	244	--	--	not reported	Lower lobe, lung	-20819	not reported	not reported	Lower lobe, lung	--	--	--	--
996a0070-e9bf-4601-8ef7-60212108258d	TCGA-55-5899	TCGA-LUAD	male	1952	white	not hispanic or latino	--	not reported	not reported	Adenocarcinoma, NOS	not reported	--	alive	8140-03-01	--	--	--	not reported	Upper lobe, lung	--	not reported	not reported	Upper lobe, lung	930	--	--	--
8cc6bcec-65df-46a9-a88c-09762a132857	TCGA-MP-A4SY	TCGA-LUAD	male	1941	white	not hispanic or latino	2006	not reported	not reported	Adenocarcinoma, NOS	stage iib	22448	dead	8140-03-01	1501	--	--	not reported	Lower lobe, lung	-22448	not reported	not reported	Lower lobe, lung	--	--	--	--
108a71cf-b9db-47cd-aa74-c03ec989b41b	TCGA-67-6217	TCGA-LUAD	female	1937	white	not hispanic or latino	--	not reported	not reported	Adenocarcinoma, NOS	stage iia	26920	alive	8140-03-01	--	--	--	not reported	Upper lobe, lung	-26920	not reported	not reported	Upper lobe, lung	422	--	--	--
a65700c2-e58c-4fd4-aeb1-5686b8f4d212	TCGA-64-5815	TCGA-LUAD	male	1935	white	not hispanic or latino	--	not reported	not reported	Adenocarcinoma with mixed subtypes	stage iib	27280	alive	8255-03-01	--	--	--	not reported	Upper lobe, lung	-27280	not reported	not reported	Upper lobe, lung	866	--	--	--
953a908d-0993-42f6-853b-512611d19a2c	TCGA-91-6849	TCGA-LUAD	female	1934	black or african american	not hispanic or latino	--	not reported	not reported	Adenocarcinoma, NOS	stage iiia	27676	alive	8140-03-01	--	--	--	not reported	Upper lobe, lung	-27676	not reported	not reported	Upper lobe, lung	35	--	--	--
195a5afb-b79f-44d2-9d12-884487630c2b	TCGA-73-4676	TCGA-LUAD	male	1965	white	not hispanic or latino	--	not reported	not reported	Adenocarcinoma, NOS	stage iia	16746	dead	8140-03-01	281	--	--	not reported	Upper lobe, lung	-16746	not reported	not reported	Upper lobe, lung	164	--	--	--
e00a60d7-4253-443d-a187-680ad0931349	TCGA-62-A46S	TCGA-LUAD	male	1934	white	not hispanic or latino	2011	not reported	not reported	Papillary adenocarcinoma, NOS	stage ib	26825	dead	8260-03-01	1653	--	--	not reported	Upper lobe, lung	-26825	not reported	not reported	Upper lobe, lung	--	--	--	--
c6b680e3-d96e-4fc7-8053-77454b7a14fa	TCGA-97-A4M7	TCGA-LUAD	male	1938	white	not hispanic or latino	--	not reported	not reported	Adenocarcinoma with mixed subtypes	stage ia	27062	alive	8255-03-01	--	--	--	not reported	Middle lobe, lung	-27062	not reported	not reported	Middle lobe, lung	629	--	--	--
e8b7a103-644f-4865-92f8-80b053bd5e17	TCGA-35-3615	TCGA-LUAD	male	1950	white	not hispanic or latino	--	not reported	not reported	Adenocarcinoma, NOS	stage ib	21076	alive	8140-03-01	--	--	--	not reported	Upper lobe, lung	-21076	not reported	not reported	Upper lobe, lung	14	--	--	--
397d3f69-1453-4057-b177-8723eec923d1	TCGA-97-8171	TCGA-LUAD	male	1930	asian	not hispanic or latino	--	not reported	not reported	Papillary adenocarcinoma, NOS	stage iv	29627	alive	8260-03-01	--	--	--	not reported	Overlapping lesion of lung	-29627	not reported	not reported	Overlapping lesion of lung	568	--	--	--
706420c4-8820-4b41-80d9-f3efd1d2a4f0	TCGA-MP-A4SV	TCGA-LUAD	male	1934	not reported	not reported	2008	not reported	not reported	Adenocarcinoma, NOS	stage ib	24516	dead	8140-03-01	2620	--	--	not reported	Lower lobe, lung	-24516	not reported	not reported	Lower lobe, lung	--	--	--	--
d8faa3a7-6b3f-4e69-8c88-184e41055bd7	TCGA-86-8280	TCGA-LUAD	female	1957	white	not hispanic or latino	--	not reported	not reported	Bronchiolo-alveolar carcinoma, non-mucinous	stage iia	19977	alive	8252-03-01	--	--	--	not reported	Lower lobe, lung	-19977	not reported	not reported	Lower lobe, lung	701	--	--	--
db769d5c-a794-448d-9130-38a82d051c95	TCGA-55-7728	TCGA-LUAD	female	1947	white	not hispanic or latino	--	not reported	not reported	Mucinous adenocarcinoma	stage ib	23505	alive	8480-03-01	--	--	--	not reported	Upper lobe, lung	-23505	not reported	not reported	Upper lobe, lung	704	--	--	--
389f78a3-fa0b-406c-9434-aa0298341a8c	TCGA-95-A4VN	TCGA-LUAD	female	1950	white	not hispanic or latino	--	not reported	not reported	Solid carcinoma, NOS	stage iia	22927	alive	8230-03-01	--	--	--	not reported	Lower lobe, lung	-22927	not reported	not reported	Lower lobe, lung	553	--	--	--
114a34c0-983b-4d90-9181-1823c9637a63	TCGA-50-6590	TCGA-LUAD	female	1933	white	not hispanic or latino	2008	not reported	not reported	Adenocarcinoma, NOS	stage ib	26444	dead	8140-03-01	1288	--	--	not reported	Upper lobe, lung	-26444	not reported	not reported	Upper lobe, lung	--	--	--	--
d3e23815-7f9d-48aa-9aef-3a1dd9d464d7	TCGA-99-AA5R	TCGA-LUAD	female	1943	black or african american	not hispanic or latino	--	not reported	not reported	Adenocarcinoma, NOS	stage ia	25778	alive	8140-03-01	--	--	--	not reported	Lower lobe, lung	-25778	not reported	not reported	Lower lobe, lung	658	--	--	--
54480f58-7e63-4aed-a116-c2c2252e8364	TCGA-91-8499	TCGA-LUAD	female	1935	white	not hispanic or latino	--	not reported	not reported	Adenocarcinoma, NOS	stage ia	27853	alive	8140-03-01	--	--	--	not reported	Lower lobe, lung	-27853	not reported	not reported	Lower lobe, lung	36	--	--	--
8f04660a-2efb-4947-9eab-375066b9eb33	TCGA-MP-A5C7	TCGA-LUAD	female	1932	white	not hispanic or latino	--	not reported	not reported	Adenocarcinoma, NOS	stage ib	28015	alive	8140-03-01	--	--	--	not reported	Upper lobe, lung	-28015	not reported	not reported	Upper lobe, lung	2248	--	--	--
301ca6e8-7981-4264-b4ae-38f56f7f9225	TCGA-MP-A4T4	TCGA-LUAD	female	1936	white	not reported	2011	not reported	not reported	Adenocarcinoma, NOS	stage iib	25052	dead	8140-03-01	2617	--	--	not reported	Lower lobe, lung	-25052	not reported	not reported	Lower lobe, lung	--	--	--	--
87f1b3df-4bc7-4336-b658-f30ac1c5c796	TCGA-95-8039	TCGA-LUAD	male	1940	white	not hispanic or latino	--	not reported	not reported	Acinar cell carcinoma	stage ia	26317	alive	8550-03-01	--	--	--	not reported	Upper lobe, lung	-26317	not reported	not reported	Upper lobe, lung	830	--	--	--
09078761-1c14-4d01-8e15-535c19a9b0f9	TCGA-97-8177	TCGA-LUAD	female	1953	white	not hispanic or latino	--	not reported	not reported	Adenocarcinoma with mixed subtypes	stage ib	21648	alive	8255-03-01	--	--	--	not reported	Lower lobe, lung	-21648	not reported	not reported	Lower lobe, lung	499	--	--	--
2a43e61e-2151-4c5a-b062-74ce9dfd8d4a	TCGA-L9-A5IP	TCGA-LUAD	female	1972	black or african american	not hispanic or latino	2012	not reported	not reported	Adenocarcinoma, NOS	stage iv	14681	dead	8140-03-01	58	--	--	not reported	Upper lobe, lung	-14681	not reported	not reported	Upper lobe, lung	--	--	--	--
f1f80dd2-891d-46dd-a3e0-f007628cb515	TCGA-4B-A93V	TCGA-LUAD	female	1961	black or african american	not hispanic or latino	--	not reported	not reported	Adenocarcinoma, NOS	stage ia	19035	dead	8140-03-01	300	--	--	not reported	Lower lobe, lung	-19035	not reported	not reported	Lower lobe, lung	254	--	--	--
fb6b289c-aaf9-4d8e-b6e0-5d35bce1b6e1	TCGA-64-1676	TCGA-LUAD	male	1947	white	not hispanic or latino	--	not reported	not reported	Adenocarcinoma, NOS	stage ia	21428	alive	8140-03-01	--	--	--	not reported	Lower lobe, lung	-21428	not reported	not reported	Lower lobe, lung	1728	--	--	--
42432463-8e92-4f25-b72a-f03953527aa5	TCGA-O1-A52J	TCGA-LUAD	female	1933	white	not hispanic or latino	2011	not reported	not reported	Adenocarcinoma, NOS	stage ia	27223	dead	8140-03-01	1798	--	--	not reported	Lower lobe, lung	-27223	not reported	not reported	Lower lobe, lung	--	--	--	--
8ab8c4ba-311e-41d0-85ea-a0245aca1bdd	TCGA-NJ-A55O	TCGA-LUAD	female	1955	white	not hispanic or latino	--	not reported	not reported	Mucinous adenocarcinoma	stage iia	20628	alive	8480-03-01	--	--	--	not reported	Upper lobe, lung	-20628	not reported	not reported	Upper lobe, lung	13	--	--	--
fd5c44ef-ea50-4fba-9e8d-e371cf34ebdb	TCGA-78-7220	TCGA-LUAD	female	1947	white	not reported	2002	not reported	not reported	Adenocarcinoma with mixed subtypes	stage iiia	19480	dead	8255-03-01	807	--	--	not reported	Upper lobe, lung	-19480	not reported	not reported	Upper lobe, lung	--	--	--	--
ebb33753-9d38-4368-9033-3e55f129d00d	TCGA-44-7671	TCGA-LUAD	male	1946	black or african american	not hispanic or latino	--	not reported	not reported	Adenocarcinoma with mixed subtypes	stage ib	23538	alive	8255-03-01	--	--	--	not reported	Middle lobe, lung	-23538	not reported	not reported	Middle lobe, lung	889	--	--	--
5c266025-e590-457c-af86-4c2dc9797267	TCGA-62-8395	TCGA-LUAD	female	1929	white	not hispanic or latino	--	not reported	not reported	Adenocarcinoma with mixed subtypes	stage iib	29311	alive	8255-03-01	--	--	--	not reported	Upper lobe, lung	-29311	not reported	not reported	Upper lobe, lung	1216	--	--	--
5af499be-d2b9-4eaf-9a9f-435dccb51917	TCGA-55-6979	TCGA-LUAD	female	1947	white	not reported	2006	not reported	not reported	Adenocarcinoma, NOS	stage iib	21780	dead	8140-03-01	237	--	--	not reported	Upper lobe, lung	-21780	not reported	not reported	Upper lobe, lung	--	--	--	--
52df074f-a402-4b78-9472-f8eb268efded	TCGA-NJ-A4YQ	TCGA-LUAD	female	1942	white	not hispanic or latino	--	not reported	not reported	Adenocarcinoma with mixed subtypes	stage ia	25427	alive	8255-03-01	--	--	--	not reported	Upper lobe, lung	-25427	not reported	not reported	Upper lobe, lung	1432	--	--	--
ebcba7f2-ce13-4bae-97cd-91a6b1dcd465	TCGA-50-5932	TCGA-LUAD	male	1926	white	not hispanic or latino	2004	not reported	not reported	Adenocarcinoma, NOS	stage iib	27454	dead	8140-03-01	1235	--	--	not reported	Upper lobe, lung	-27454	not reported	not reported	Upper lobe, lung	1091	--	--	--
7be86a90-6da8-4c01-8a7a-bc5cfef9894f	TCGA-78-7539	TCGA-LUAD	female	1936	white	not reported	--	not reported	not reported	Adenocarcinoma with mixed subtypes	stage iia	27445	alive	8255-03-01	--	--	--	not reported	Upper lobe, lung	-27445	not reported	not reported	Upper lobe, lung	791	--	--	--
659668e8-f0d9-4ff2-bbc8-9246f2ef49ab	TCGA-55-7281	TCGA-LUAD	female	1941	white	not reported	--	not reported	not reported	Adenocarcinoma, NOS	stage ia	25870	alive	8140-03-01	--	--	--	not reported	Middle lobe, lung	-25870	not reported	not reported	Middle lobe, lung	872	--	--	--
f7f9f522-de88-4f9c-8ba4-7be3726faaf8	TCGA-MP-A4TK	TCGA-LUAD	female	1946	not reported	not reported	2003	not reported	not reported	Adenocarcinoma, NOS	stage iib	20581	dead	8140-03-01	582	--	--	not reported	Lower lobe, lung	-20581	not reported	not reported	Lower lobe, lung	--	--	--	--
d28e465c-e553-4c53-8bb7-3d8199b9a8a5	TCGA-05-4410	TCGA-LUAD	male	1945	not reported	not reported	--	not reported	not reported	Adenocarcinoma with mixed subtypes	stage ib	22888	alive	8255-03-01	--	--	--	not reported	Upper lobe, lung	-22888	not reported	not reported	Upper lobe, lung	0	--	--	--
36470b30-a3b3-4d28-851b-918a7ff88011	TCGA-55-8096	TCGA-LUAD	female	1944	white	not hispanic or latino	--	not reported	not reported	Adenocarcinoma, NOS	stage ib	24684	dead	8140-03-01	719	--	--	not reported	Upper lobe, lung	-24684	not reported	not reported	Upper lobe, lung	47	--	--	--
cbbea9f1-396a-4bf3-b67c-2cac3394dceb	TCGA-44-6779	TCGA-LUAD	female	1958	white	not reported	2009	not reported	not reported	Adenocarcinoma, NOS	stage iib	18469	dead	8140-03-01	500	--	--	not reported	Lung, NOS	-18469	not reported	not reported	Lung, NOS	--	--	--	--
e5cb0c86-8fe2-4cfc-b32b-e8ec3839ffc4	TCGA-55-6985	TCGA-LUAD	female	1946	white	not reported	--	not reported	not reported	Adenocarcinoma, NOS	stage ib	21381	alive	8140-03-01	--	--	--	not reported	Upper lobe, lung	-21381	not reported	not reported	Upper lobe, lung	1233	--	--	--
433a32d0-93d1-4897-8e36-beb1ec1d998e	TCGA-62-8402	TCGA-LUAD	female	1935	white	not hispanic or latino	--	not reported	not reported	Adenocarcinoma with mixed subtypes	stage iiia	26934	dead	8255-03-01	1498	--	--	not reported	Upper lobe, lung	-26934	not reported	not reported	Upper lobe, lung	1445	--	--	--
2f09479f-87fc-4c34-8e2c-333e970a3681	TCGA-91-6835	TCGA-LUAD	female	1929	white	not hispanic or latino	--	not reported	not reported	Adenocarcinoma, NOS	stage ia	29887	alive	8140-03-01	--	--	--	not reported	Lower lobe, lung	-29887	not reported	not reported	Lower lobe, lung	79	--	--	--
e01e4fb3-236a-4d16-9073-555876b688e9	TCGA-86-A4JF	TCGA-LUAD	male	1956	white	not hispanic or latino	--	not reported	not reported	Adenocarcinoma, NOS	stage iib	20491	dead	8140-03-01	737	--	--	not reported	Upper lobe, lung	-20491	not reported	not reported	Upper lobe, lung	536	--	--	--
d7ae8efb-aa4d-4807-9772-55b0a28ccd5c	TCGA-62-A46O	TCGA-LUAD	female	1941	white	not hispanic or latino	2009	not reported	not reported	Adenocarcinoma, NOS	stage ib	24050	dead	8140-03-01	1454	--	--	not reported	Lower lobe, lung	-24050	not reported	not reported	Lower lobe, lung	--	--	--	--
3bc7026f-73f2-418b-bd62-f4768582b790	TCGA-95-7567	TCGA-LUAD	male	1950	white	not hispanic or latino	--	not reported	not reported	Adenocarcinoma with mixed subtypes	stage iib	22437	alive	8255-03-01	--	--	--	not reported	Upper lobe, lung	-22437	not reported	not reported	Upper lobe, lung	568	--	--	--
0b31dbdf-0623-48e4-a0ec-017650dceda7	TCGA-91-6836	TCGA-LUAD	female	1958	white	not hispanic or latino	--	not reported	not reported	Adenocarcinoma, NOS	stage ib	19216	alive	8140-03-01	--	--	--	not reported	Upper lobe, lung	-19216	not reported	not reported	Upper lobe, lung	417	--	--	--
d94fe32f-bedd-4f4c-9feb-fcb60d40f4bb	TCGA-05-4434	TCGA-LUAD	female	1941	not reported	not reported	2009	not reported	not reported	Adenocarcinoma with mixed subtypes	stage iv	24472	dead	8255-03-01	457	--	--	not reported	Lower lobe, lung	-24472	not reported	not reported	Lower lobe, lung	--	--	--	--
7ca711ec-9ac0-4fa7-8a60-32ae84b8789a	TCGA-53-A4EZ	TCGA-LUAD	male	1949	white	hispanic or latino	--	not reported	not reported	Acinar cell carcinoma	stage iia	23201	alive	8550-03-01	--	--	--	not reported	Upper lobe, lung	-23201	not reported	not reported	Upper lobe, lung	1071	--	--	--
ef03654a-dcf1-41ff-a67e-4f3fbf9ba807	TCGA-93-7347	TCGA-LUAD	female	1935	white	not hispanic or latino	--	not reported	not reported	Adenocarcinoma with mixed subtypes	stage ia	27949	alive	8255-03-01	--	--	--	not reported	Upper lobe, lung	-27949	not reported	not reported	Upper lobe, lung	683	--	--	--
9b4eeecb-6aff-435b-a244-ec362af92b7f	TCGA-05-5425	TCGA-LUAD	male	1941	not reported	not reported	--	not reported	not reported	Adenocarcinoma with mixed subtypes	stage iib	25020	alive	8255-03-01	--	--	--	not reported	Lung, NOS	-25020	not reported	not reported	Lung, NOS	882	--	--	--
83a6ed20-b3cf-48b9-8ed3-a080cd4951fa	TCGA-55-6968	TCGA-LUAD	male	1943	white	not hispanic or latino	2007	not reported	not reported	Adenocarcinoma, NOS	stage iv	22344	dead	8140-03-01	1293	--	--	not reported	Lower lobe, lung	-22344	not reported	not reported	Lower lobe, lung	--	--	--	--
9240d5fc-de23-4436-8099-da9bd3054860	TCGA-62-8397	TCGA-LUAD	female	1938	white	not hispanic or latino	--	not reported	not reported	Adenocarcinoma with mixed subtypes	stage iib	25728	alive	8255-03-01	--	--	--	not reported	Lower lobe, lung	-25728	not reported	not reported	Lower lobe, lung	1289	--	--	--
5134c56f-8286-4ec8-8348-237cee7dad5e	TCGA-55-6978	TCGA-LUAD	male	1929	white	not hispanic or latino	2010	not reported	not reported	Adenocarcinoma, NOS	stage iia	--	dead	8140-03-01	176	--	--	not reported	Middle lobe, lung	--	not reported	not reported	Middle lobe, lung	--	--	--	--
8e41153b-9faf-45c3-8397-8a428ef5c0d5	TCGA-55-7573	TCGA-LUAD	female	1939	white	not hispanic or latino	--	not reported	not reported	Adenocarcinoma, NOS	stage ia	26302	alive	8140-03-01	--	--	--	not reported	Upper lobe, lung	-26302	not reported	not reported	Upper lobe, lung	487	--	--	--
c497f8c7-2fb5-44d9-bc7c-69cfd0b51b54	TCGA-62-A46R	TCGA-LUAD	female	1952	white	not hispanic or latino	2010	not reported	not reported	Adenocarcinoma with mixed subtypes	stage ib	20063	dead	8255-03-01	1725	--	--	not reported	Lower lobe, lung	-20063	not reported	not reported	Lower lobe, lung	--	--	--	--
230dc42d-681c-4e31-9d2e-c724e61829fb	TCGA-44-8119	TCGA-LUAD	male	1939	white	not hispanic or latino	--	not reported	not reported	Adenocarcinoma, NOS	stage iib	27003	alive	8140-03-01	--	--	--	not reported	Upper lobe, lung	-27003	not reported	not reported	Upper lobe, lung	285	--	--	--
8fdbd88f-19ae-4ab8-bcd7-6bfa1bbde742	TCGA-64-5778	TCGA-LUAD	male	1948	white	not hispanic or latino	--	not reported	not reported	Bronchiolo-alveolar carcinoma, non-mucinous	stage ib	21927	alive	8252-03-01	--	--	--	not reported	Upper lobe, lung	-21927	not reported	not reported	Upper lobe, lung	1305	--	--	--
eeab558b-8d1e-4843-861d-dbfb06061758	TCGA-67-3770	TCGA-LUAD	female	1939	white	not hispanic or latino	--	not reported	not reported	Adenocarcinoma, NOS	stage ia	25658	alive	8140-03-01	--	--	--	not reported	Upper lobe, lung	-25658	not reported	not reported	Upper lobe, lung	610	--	--	--
d15b7b29-c5c5-41d8-b83b-7cc12fe92820	TCGA-05-4415	TCGA-LUAD	male	1951	not reported	not reported	2008	not reported	not reported	Adenocarcinoma with mixed subtypes	stage iiib	20880	dead	8255-03-01	91	--	--	not reported	Lower lobe, lung	-20880	not reported	not reported	Lower lobe, lung	--	--	--	--
a8d6694c-a213-4544-ac0b-63bce16d8f4e	TCGA-75-6203	TCGA-LUAD	female	--	not reported	not reported	--	not reported	not reported	Adenocarcinoma, NOS	stage iiia	--	alive	8140-03-01	--	--	--	not reported	Lower lobe, lung	--	not reported	not reported	Lower lobe, lung	--	--	--	--
7e83f9dd-b038-497b-a113-a55605398b7b	TCGA-99-8032	TCGA-LUAD	male	1950	white	not hispanic or latino	--	not reported	not reported	Adenocarcinoma, NOS	stage ia	22635	alive	8140-03-01	--	--	--	not reported	Upper lobe, lung	-22635	not reported	not reported	Upper lobe, lung	44	--	--	--
4b22ad71-c585-4077-ad3c-c6e026d0c7fa	TCGA-44-7669	TCGA-LUAD	male	1951	black or african american	not hispanic or latino	2011	not reported	not reported	Adenocarcinoma, NOS	stage iia	21893	dead	8140-03-01	574	--	--	not reported	Upper lobe, lung	-21893	not reported	not reported	Upper lobe, lung	--	--	--	--
4036c6fc-c82e-47bb-a384-6f299dc30b52	TCGA-44-7672	TCGA-LUAD	female	1958	white	not hispanic or latino	--	not reported	not reported	Adenocarcinoma, NOS	stage ia	19200	alive	8140-03-01	--	--	--	not reported	Upper lobe, lung	-19200	not reported	not reported	Upper lobe, lung	719	--	--	--
c4c1469d-752f-42b6-8686-714ad4a8ac97	TCGA-75-6206	TCGA-LUAD	male	--	not reported	not reported	--	not reported	not reported	Adenocarcinoma, NOS	stage ib	--	alive	8140-03-01	--	--	--	not reported	Upper lobe, lung	--	not reported	not reported	Upper lobe, lung	2590	--	--	--
e2b0d873-4942-4483-9a88-d5c6338d0382	TCGA-97-A4LX	TCGA-LUAD	male	1931	white	not hispanic or latino	--	not reported	not reported	Adenocarcinoma with mixed subtypes	stage ib	29915	alive	8255-03-01	--	--	--	not reported	Upper lobe, lung	-29915	not reported	not reported	Upper lobe, lung	614	--	--	--
edf80622-aea2-4b50-bb69-691d6708aa83	TCGA-38-6178	TCGA-LUAD	female	1940	white	not hispanic or latino	--	not reported	not reported	Adenocarcinoma, NOS	stage iiia	25593	alive	8140-03-01	--	--	--	not reported	Upper lobe, lung	-25593	not reported	not reported	Upper lobe, lung	448	--	--	--
7c4ed533-ee66-48be-a84b-ff8607742818	TCGA-MP-A4T8	TCGA-LUAD	male	1938	not reported	not reported	2006	not reported	not reported	Adenocarcinoma, NOS	stage iiia	25069	dead	8140-03-01	161	--	--	not reported	Upper lobe, lung	-25069	not reported	not reported	Upper lobe, lung	--	--	--	--
ff07ea4b-4e50-410d-99d6-96a351dad7b1	TCGA-55-7570	TCGA-LUAD	male	1951	black or african american	not hispanic or latino	--	not reported	not reported	Adenocarcinoma, NOS	stage ia	22218	alive	8140-03-01	--	--	--	not reported	Upper lobe, lung	-22218	not reported	not reported	Upper lobe, lung	824	--	--	--
d31aeefc-b59b-42e9-9919-750b17a70a3d	TCGA-55-1595	TCGA-LUAD	female	1930	asian	not hispanic or latino	--	not reported	not reported	Clear cell adenocarcinoma, NOS	stage ia	--	alive	8310-03-01	--	--	--	not reported	Lower lobe, lung	--	not reported	not reported	Lower lobe, lung	1479	--	--	--
5813997a-d7dc-4f7c-8d4b-e979832168a9	TCGA-49-AAR3	TCGA-LUAD	male	1939	black or african american	not hispanic or latino	--	not reported	not reported	Adenocarcinoma, NOS	stage iib	25469	alive	8140-03-01	--	--	--	not reported	Upper lobe, lung	-25469	not reported	not reported	Upper lobe, lung	1893	--	--	--
f40301ba-831e-4afd-9ce8-5f3c1a05ff7e	TCGA-44-2657	TCGA-LUAD	female	1935	white	not hispanic or latino	--	not reported	not reported	Adenocarcinoma, NOS	stage ib	27298	alive	8140-03-01	--	--	--	not reported	Upper lobe, lung	-27298	not reported	not reported	Upper lobe, lung	1351	--	--	--
9ee20c0d-a1c3-47f3-abda-131b3f190f52	TCGA-50-5045	TCGA-LUAD	female	1947	black or african american	not hispanic or latino	2009	not reported	not reported	Adenocarcinoma, NOS	not reported	20961	dead	8140-03-01	2174	--	--	not reported	Lower lobe, lung	-20961	not reported	not reported	Lower lobe, lung	--	--	--	--
762dea8a-5b41-4058-979a-b7876ed13d7e	TCGA-05-4395	TCGA-LUAD	male	1930	not reported	not reported	2006	not reported	not reported	Adenocarcinoma with mixed subtypes	stage iiib	27971	dead	8255-03-01	0	--	--	not reported	Upper lobe, lung	-27971	not reported	not reported	Upper lobe, lung	--	--	--	--
d3ff328c-2488-47bd-8663-366b6812c7b5	TCGA-53-7626	TCGA-LUAD	female	1932	white	not hispanic or latino	2010	not reported	not reported	Adenocarcinoma, NOS	stage iia	28024	dead	8140-03-01	929	--	--	not reported	Upper lobe, lung	-28024	not reported	not reported	Upper lobe, lung	--	--	--	--
07b5663f-9a54-4462-b6c1-6fc8116b8714	TCGA-44-2655	TCGA-LUAD	female	1944	white	not hispanic or latino	--	not reported	not reported	Adenocarcinoma, NOS	stage ia	23854	alive	8140-03-01	--	--	--	not reported	Upper lobe, lung	-23854	not reported	not reported	Upper lobe, lung	1324	--	--	--
33e3f736-7990-4f7a-ac35-863247566541	TCGA-05-5423	TCGA-LUAD	male	1941	not reported	not reported	--	not reported	not reported	Adenocarcinoma with mixed subtypes	stage iib	23863	alive	8255-03-01	--	--	--	not reported	Lung, NOS	-23863	not reported	not reported	Lung, NOS	151	--	--	--
472337c2-a2fc-403a-8c17-69511193128b	TCGA-86-8056	TCGA-LUAD	female	1948	white	not hispanic or latino	--	not reported	not reported	Adenocarcinoma with mixed subtypes	stage iiia	23369	alive	8255-03-01	--	--	--	not reported	Upper lobe, lung	-23369	not reported	not reported	Upper lobe, lung	139	--	--	--
a3f6bc1c-19ab-4eeb-a9ac-3d2fac850bde	TCGA-86-7701	TCGA-LUAD	male	1945	white	not hispanic or latino	--	not reported	not reported	Adenocarcinoma, NOS	stage iv	24209	alive	8140-03-01	--	--	--	not reported	Upper lobe, lung	-24209	not reported	not reported	Upper lobe, lung	947	--	--	--
75a0bb0b-6528-4fb8-a9e6-254905d21df4	TCGA-MN-A4N1	TCGA-LUAD	male	1951	black or african american	not hispanic or latino	--	not reported	not reported	Adenocarcinoma, NOS	stage iia	21939	alive	8140-03-01	--	--	--	not reported	Upper lobe, lung	-21939	not reported	not reported	Upper lobe, lung	827	--	--	--
6d72de06-232a-4983-a06c-eba6d82cb3f1	TCGA-55-1594	TCGA-LUAD	male	1937	white	not hispanic or latino	--	not reported	not reported	Adenocarcinoma, NOS	stage iiia	25008	alive	8140-03-01	--	--	--	not reported	Lower lobe, lung	-25008	not reported	not reported	Lower lobe, lung	1178	--	--	--
7f6455e8-fa3d-4452-acb2-8c9995073072	TCGA-44-7667	TCGA-LUAD	female	1960	white	not hispanic or latino	--	not reported	not reported	Adenocarcinoma, NOS	stage iib	18062	alive	8140-03-01	--	--	--	not reported	Lower lobe, lung	-18062	not reported	not reported	Lower lobe, lung	1097	--	--	--
21fb46f9-4bbb-441c-af19-a687e9138344	TCGA-49-6742	TCGA-LUAD	male	1940	white	not hispanic or latino	--	not reported	not reported	Mucinous adenocarcinoma	stage iia	25839	dead	8480-03-01	488	--	--	not reported	Upper lobe, lung	-25839	not reported	not reported	Upper lobe, lung	445	--	--	--
ceead734-1ce0-4385-b65a-a9c853b7308e	TCGA-MN-A4N4	TCGA-LUAD	male	1953	white	not hispanic or latino	--	not reported	not reported	Adenocarcinoma, NOS	stage ia	20888	alive	8140-03-01	--	--	--	not reported	Upper lobe, lung	-20888	not reported	not reported	Upper lobe, lung	1175	--	--	--
5abd6651-69be-42f8-bdc0-308e68136d31	TCGA-78-7163	TCGA-LUAD	male	1932	white	not reported	--	not reported	not reported	Adenocarcinoma, NOS	stage ib	22002	alive	8140-03-01	--	--	--	not reported	Lower lobe, lung	-22002	not reported	not reported	Lower lobe, lung	7248	--	--	--
205759a6-6391-491b-9857-0080c3a5871e	TCGA-75-5125	TCGA-LUAD	male	--	not reported	not reported	--	not reported	not reported	Adenocarcinoma, NOS	stage iib	--	dead	8140-03-01	2027	--	--	not reported	Upper lobe, lung	--	not reported	not reported	Upper lobe, lung	--	--	--	--
0075437e-ba1a-46be-86d6-9773209a2b5e	TCGA-62-A471	TCGA-LUAD	male	1946	white	not hispanic or latino	--	not reported	not reported	Adenocarcinoma, NOS	stage iib	23689	alive	8140-03-01	--	--	--	not reported	Upper lobe, lung	-23689	not reported	not reported	Upper lobe, lung	1246	--	--	--
c9c533ee-e154-4a56-bce9-b5af37574b2f	TCGA-55-7913	TCGA-LUAD	female	1950	black or african american	not hispanic or latino	--	not reported	not reported	Adenocarcinoma, NOS	stage ia	22326	dead	8140-03-01	561	--	--	not reported	Lower lobe, lung	-22326	not reported	not reported	Lower lobe, lung	62	--	--	--
0d0d83d9-d558-4d38-977b-6f1b2471beda	TCGA-86-7955	TCGA-LUAD	male	1949	white	not hispanic or latino	--	not reported	not reported	Adenocarcinoma, NOS	stage ib	22772	alive	8140-03-01	--	--	--	not reported	Lower lobe, lung	-22772	not reported	not reported	Lower lobe, lung	1072	--	--	--
23069f19-eba5-4ea5-ae7d-1ee4399ce7c1	TCGA-75-6212	TCGA-LUAD	female	--	not reported	not reported	--	not reported	not reported	Micropapillary carcinoma, NOS	stage iib	--	dead	8265-03-01	1516	--	--	not reported	Lower lobe, lung	--	not reported	not reported	Lower lobe, lung	--	--	--	--
a816e355-be6f-4d16-b051-b6d86ed8cded	TCGA-86-8278	TCGA-LUAD	female	1948	white	not hispanic or latino	--	not reported	not reported	Mucinous adenocarcinoma	stage iib	23117	alive	8480-03-01	--	--	--	not reported	Lower lobe, lung	-23117	not reported	not reported	Lower lobe, lung	944	--	--	--
ea0b9461-0d4d-4ade-a255-1b03dd85e30e	TCGA-91-A4BC	TCGA-LUAD	male	1953	white	not hispanic or latino	--	not reported	not reported	Adenocarcinoma, NOS	stage iia	21565	alive	8140-03-01	--	--	--	not reported	Upper lobe, lung	-21565	not reported	not reported	Upper lobe, lung	44	--	--	--
a52e99d6-a61a-439d-b0b1-ca7a0eabcb04	TCGA-95-7948	TCGA-LUAD	female	1969	white	not hispanic or latino	--	not reported	not reported	Adenocarcinoma with mixed subtypes	stage ib	15363	alive	8255-03-01	--	--	--	not reported	Lower lobe, lung	-15363	not reported	not reported	Lower lobe, lung	476	--	--	--
8994c8c4-9ea0-46cb-b4a5-0055d7da5bfa	TCGA-44-6148	TCGA-LUAD	male	1951	white	not hispanic or latino	--	not reported	not reported	Mucinous adenocarcinoma	stage ia	22138	alive	8480-03-01	--	--	--	not reported	Lower lobe, lung	-22138	not reported	not reported	Lower lobe, lung	704	--	--	--
b61abdfd-b7a0-4e1a-b570-d1eaecad3a9e	TCGA-49-4506	TCGA-LUAD	female	1929	white	not hispanic or latino	1999	not reported	not reported	Adenocarcinoma, NOS	stage iib	25132	dead	8140-03-01	999	--	--	not reported	Upper lobe, lung	-25132	not reported	not reported	Upper lobe, lung	--	--	--	--
dd63d0fd-e24b-40a5-88c5-7d3d4106631e	TCGA-97-A4M0	TCGA-LUAD	female	1952	white	not hispanic or latino	--	not reported	not reported	Adenocarcinoma with mixed subtypes	stage ib	22206	alive	8255-03-01	--	--	--	not reported	Upper lobe, lung	-22206	not reported	not reported	Upper lobe, lung	652	--	--	--
4b92fce2-3772-40eb-ab34-a27937b58590	TCGA-55-8092	TCGA-LUAD	male	1937	white	not hispanic or latino	--	not reported	not reported	Adenocarcinoma, NOS	stage iib	27597	dead	8140-03-01	154	--	--	not reported	Upper lobe, lung	-27597	not reported	not reported	Upper lobe, lung	26	--	--	--
5d5cc436-6e57-4d23-a164-7f5153c2e666	TCGA-44-6778	TCGA-LUAD	male	1948	black or african american	not reported	--	not reported	not reported	Adenocarcinoma, NOS	stage ia	21725	alive	8140-03-01	--	--	--	not reported	Lung, NOS	-21725	not reported	not reported	Lung, NOS	1864	--	--	--
f327dea0-2d30-482f-809c-76a148a749b7	TCGA-MP-A4TI	TCGA-LUAD	male	1938	white	not hispanic or latino	2011	not reported	not reported	Adenocarcinoma, NOS	stage iia	26565	dead	8140-03-01	429	--	--	not reported	Lower lobe, lung	-26565	not reported	not reported	Lower lobe, lung	--	--	--	--
05534064-8b43-4c82-95da-70fd83bd6560	TCGA-78-7540	TCGA-LUAD	female	1933	white	not reported	--	not reported	not reported	Bronchio-alveolar carcinoma, mucinous	stage ib	24440	dead	8253-03-01	1197	--	--	not reported	Lower lobe, lung	-24440	not reported	not reported	Lower lobe, lung	881	--	--	--
8214a0d1-5e2d-4a7a-acb1-e5580755db83	TCGA-38-7271	TCGA-LUAD	female	1934	white	not hispanic or latino	2008	not reported	not reported	Adenocarcinoma, NOS	stage ia	26440	dead	8140-03-01	800	--	--	not reported	Upper lobe, lung	-26440	not reported	not reported	Upper lobe, lung	--	--	--	--
5d7ec32a-049f-4997-9882-1b3ac157e02d	TCGA-86-8281	TCGA-LUAD	male	1936	white	not hispanic or latino	--	not reported	not reported	Adenocarcinoma, NOS	stage ia	27409	alive	8140-03-01	--	--	--	not reported	Lower lobe, lung	-27409	not reported	not reported	Lower lobe, lung	0	--	--	--
e16ca88f-488b-40f0-9169-e5a62482a2ff	TCGA-44-2666	TCGA-LUAD	male	1966	white	hispanic or latino	2009	not reported	not reported	Adenocarcinoma, NOS	stage ib	15970	dead	8140-03-01	97	--	--	not reported	Upper lobe, lung	-15970	not reported	not reported	Upper lobe, lung	97	--	--	--
193201a3-1447-47b1-bdf1-11ae0eb3b2f3	TCGA-95-7562	TCGA-LUAD	male	1940	black or african american	not hispanic or latino	2011	not reported	not reported	Adenocarcinoma, NOS	stage iia	26000	dead	8140-03-01	87	--	--	not reported	Lower lobe, lung	-26000	not reported	not reported	Lower lobe, lung	--	--	--	--
562a562b-ca03-44ac-b282-b51b457d8dae	TCGA-62-A46Y	TCGA-LUAD	female	1938	white	not hispanic or latino	2009	not reported	not reported	Adenocarcinoma with mixed subtypes	stage iiia	25905	dead	8255-03-01	414	--	--	not reported	Lower lobe, lung	-25905	not reported	not reported	Lower lobe, lung	--	--	--	--
d45aee46-838e-44af-8422-46710b3240a8	TCGA-50-8457	TCGA-LUAD	female	1948	black or african american	not hispanic or latino	--	not reported	not reported	Adenocarcinoma with mixed subtypes	stage ia	23055	alive	8255-03-01	--	--	--	not reported	Upper lobe, lung	-23055	not reported	not reported	Upper lobe, lung	1125	--	--	--
31ff69b5-9e58-44da-8326-bdfc7ee495c4	TCGA-97-A4M6	TCGA-LUAD	female	1967	white	not hispanic or latino	--	not reported	not reported	Adenocarcinoma with mixed subtypes	stage ia	16764	alive	8255-03-01	--	--	--	not reported	Lower lobe, lung	-16764	not reported	not reported	Lower lobe, lung	568	--	--	--
b256e065-c681-4f82-8b68-a8ef7c413791	TCGA-55-8207	TCGA-LUAD	male	1938	white	not hispanic or latino	--	not reported	not reported	Acinar cell carcinoma	stage ib	26897	alive	8550-03-01	--	--	--	not reported	Lower lobe, lung	-26897	not reported	not reported	Lower lobe, lung	977	--	--	--
47b749e6-e060-4aa1-8f29-976e489ba789	TCGA-49-AAR9	TCGA-LUAD	male	1938	black or african american	not hispanic or latino	1999	not reported	not reported	Adenocarcinoma, NOS	stage iib	22510	dead	8140-03-01	260	--	--	not reported	Lung, NOS	-22510	not reported	not reported	Lung, NOS	--	--	--	--
fb79c491-7b01-42ae-8369-8364e442e31b	TCGA-44-2665	TCGA-LUAD	female	1954	white	not hispanic or latino	--	not reported	not reported	Adenocarcinoma, NOS	stage iib	20349	alive	8140-03-01	--	--	--	not reported	Upper lobe, lung	-20349	not reported	not reported	Upper lobe, lung	1301	--	--	--
3fe8f8e4-5396-4362-82f5-366e2fb69db2	TCGA-05-5428	TCGA-LUAD	male	1953	not reported	not reported	--	not reported	not reported	Adenocarcinoma with mixed subtypes	stage iia	21061	alive	8255-03-01	--	--	--	not reported	Lung, NOS	-21061	not reported	not reported	Lung, NOS	670	--	--	--
3ed05070-6633-4de5-9f72-090f93aa2e4d	TCGA-55-8506	TCGA-LUAD	female	1950	white	not hispanic or latino	--	not reported	not reported	Adenocarcinoma, NOS	stage iib	22850	alive	8140-03-01	--	--	--	not reported	Upper lobe, lung	-22850	not reported	not reported	Upper lobe, lung	11	--	--	--
548b0b68-ff45-4d45-adbe-984259e4a68b	TCGA-55-7816	TCGA-LUAD	female	1962	white	not hispanic or latino	--	not reported	not reported	Adenocarcinoma, NOS	stage iv	18170	dead	8140-03-01	468	--	--	not reported	Upper lobe, lung	-18170	not reported	not reported	Upper lobe, lung	44	--	--	--
99c35245-e1c8-4805-b7a5-f703bb506030	TCGA-MP-A4TC	TCGA-LUAD	male	1931	white	not hispanic or latino	2008	not reported	not reported	Adenocarcinoma, NOS	stage iiia	28471	dead	8140-03-01	74	--	--	not reported	Middle lobe, lung	-28471	not reported	not reported	Middle lobe, lung	--	--	--	--
ccecce70-dd54-4c5b-bf9f-ca87d290cb00	TCGA-67-6216	TCGA-LUAD	female	1953	white	not hispanic or latino	--	not reported	not reported	Adenocarcinoma, NOS	stage ia	20967	alive	8140-03-01	--	--	--	not reported	Middle lobe, lung	-20967	not reported	not reported	Middle lobe, lung	141	--	--	--
967d6548-5a84-4b7e-bc3f-2e522859fce6	TCGA-44-A47B	TCGA-LUAD	male	1933	white	not hispanic or latino	--	not reported	not reported	Adenocarcinoma, NOS	stage ib	28869	alive	8140-03-01	--	--	--	not reported	Upper lobe, lung	-28869	not reported	not reported	Upper lobe, lung	287	--	--	--
c95957a7-1a1a-4c8d-bb61-7c99b500f224	TCGA-50-5946	TCGA-LUAD	male	1948	white	not reported	--	not reported	not reported	Adenocarcinoma with mixed subtypes	stage ia	22852	alive	8255-03-01	--	--	--	not reported	Upper lobe, lung	-22852	not reported	not reported	Upper lobe, lung	1617	--	--	--
5202458b-c38a-47c0-a0ba-5f1a59a762a0	TCGA-49-AARO	TCGA-LUAD	female	1964	black or african american	not hispanic or latino	--	not reported	not reported	Papillary adenocarcinoma, NOS	stage ia	14527	alive	8260-03-01	--	--	--	not reported	Upper lobe, lung	-14527	not reported	not reported	Upper lobe, lung	3759	--	--	--
aee86a89-0377-4080-b16c-408bfbe78687	TCGA-69-7980	TCGA-LUAD	female	1941	white	not hispanic or latino	--	not reported	not reported	Adenocarcinoma, NOS	stage i	25583	alive	8140-03-01	--	--	--	not reported	Upper lobe, lung	-25583	not reported	not reported	Upper lobe, lung	362	--	--	--
f809e7d9-a75e-41c9-ac2c-5bec6ffcb4a2	TCGA-49-AAR2	TCGA-LUAD	male	1945	black or african american	not hispanic or latino	--	not reported	not reported	Acinar cell carcinoma	stage ib	23479	alive	8550-03-01	--	--	--	not reported	Lower lobe, lung	-23479	not reported	not reported	Lower lobe, lung	2224	--	--	--
cbfef004-b437-4d51-9d88-a2db50aa6481	TCGA-44-7661	TCGA-LUAD	female	1942	white	not hispanic or latino	--	not reported	not reported	Adenocarcinoma, NOS	stage ib	25483	dead	8140-03-01	557	--	--	not reported	Lower lobe, lung	-25483	not reported	not reported	Lower lobe, lung	366	--	--	--
6e3b6b72-142d-4b8d-a462-28a205796e41	TCGA-44-3918	TCGA-LUAD	female	1950	white	not hispanic or latino	--	not reported	not reported	Adenocarcinoma, NOS	stage ia	22236	alive	8140-03-01	--	--	--	not reported	Upper lobe, lung	-22236	not reported	not reported	Upper lobe, lung	1036	--	--	--
f0c94f68-bfd9-45cb-b4fd-8bb1ae4e9a2b	TCGA-69-8254	TCGA-LUAD	male	1927	white	not hispanic or latino	--	not reported	not reported	Adenocarcinoma with mixed subtypes	not reported	31134	alive	8255-03-01	--	--	--	not reported	Lower lobe, lung	-31134	not reported	not reported	Lower lobe, lung	409	--	--	--
088edf89-d2b5-40c7-b066-df3bd383f7ea	TCGA-49-4505	TCGA-LUAD	female	1935	white	not hispanic or latino	1997	not reported	not reported	Adenocarcinoma, NOS	stage iib	22628	dead	8140-03-01	428	--	--	not reported	Lower lobe, lung	-22628	not reported	not reported	Lower lobe, lung	--	--	--	--
e379cf55-68ef-4fbc-af3e-0a5040c27f0f	TCGA-MP-A4T2	TCGA-LUAD	male	1932	white	not hispanic or latino	2006	not reported	not reported	Adenocarcinoma, NOS	stage ia	26010	dead	8140-03-01	1136	--	--	not reported	Lower lobe, lung	-26010	not reported	not reported	Lower lobe, lung	--	--	--	--
31c96e35-5e2f-429c-b12a-7bc5a497a300	TCGA-05-4398	TCGA-LUAD	female	1959	not reported	not reported	--	not reported	not reported	Adenocarcinoma with mixed subtypes	stage iiib	17471	alive	8255-03-01	--	--	--	not reported	Upper lobe, lung	-17471	not reported	not reported	Upper lobe, lung	1431	--	--	--
575752f8-2788-43cd-afde-f0f600f39d18	TCGA-97-A4M3	TCGA-LUAD	female	1943	white	not hispanic or latino	--	not reported	not reported	Adenocarcinoma with mixed subtypes	stage ia	25384	alive	8255-03-01	--	--	--	not reported	Upper lobe, lung	-25384	not reported	not reported	Upper lobe, lung	540	--	--	--
9582b436-145b-4f84-8f7f-8b39b8254cc1	TCGA-99-8033	TCGA-LUAD	female	1937	white	not hispanic or latino	--	not reported	not reported	Adenocarcinoma, NOS	stage iv	27342	dead	8140-03-01	656	--	--	not reported	Upper lobe, lung	-27342	not reported	not reported	Upper lobe, lung	170	--	--	--
61c655ec-52b5-453f-a6cc-b2aba445b027	TCGA-49-4486	TCGA-LUAD	male	1920	white	not hispanic or latino	1998	not reported	not reported	Adenocarcinoma, NOS	stage ia	26415	dead	8140-03-01	2318	--	--	not reported	Lower lobe, lung	-26415	not reported	not reported	Lower lobe, lung	--	--	--	--
e64f76e4-f748-4d9e-ba71-53e2818a7920	TCGA-78-7542	TCGA-LUAD	male	1937	white	not reported	1993	not reported	not reported	Adenocarcinoma, NOS	stage ib	20763	dead	8140-03-01	321	--	--	not reported	Upper lobe, lung	-20763	not reported	not reported	Upper lobe, lung	--	--	--	--
3434b91a-c05f-460f-a078-7b1bb6e7085d	TCGA-05-4382	TCGA-LUAD	male	1941	not reported	not reported	--	not reported	not reported	Adenocarcinoma with mixed subtypes	stage ib	24868	alive	8255-03-01	--	--	--	not reported	Upper lobe, lung	-24868	not reported	not reported	Upper lobe, lung	607	--	--	--
294ff941-aea1-4588-9a0e-e9f5393e2bb6	TCGA-73-4662	TCGA-LUAD	female	1942	white	not hispanic or latino	--	not reported	not reported	Adenocarcinoma, NOS	stage ia	23762	alive	8140-03-01	--	--	--	not reported	Upper lobe, lung	-23762	not reported	not reported	Upper lobe, lung	2515	--	--	--
77828a90-8e2a-4664-b674-d837e6e34fe4	TCGA-69-7761	TCGA-LUAD	male	1927	white	not hispanic or latino	--	not reported	not reported	Acinar cell carcinoma	stage ib	31041	alive	8550-03-01	--	--	--	not reported	Lower lobe, lung	-31041	not reported	not reported	Lower lobe, lung	186	--	--	--
18478121-f1d1-4bdd-9511-8ab22f4a0660	TCGA-78-8640	TCGA-LUAD	male	1935	not reported	not reported	--	not reported	not reported	Adenocarcinoma, NOS	stage iia	21832	alive	8140-03-01	--	--	--	not reported	Upper lobe, lung	-21832	not reported	not reported	Upper lobe, lung	7062	--	--	--
54a0e4d7-c274-4569-9c25-45bbe26d7f21	TCGA-55-6983	TCGA-LUAD	male	1924	white	not hispanic or latino	--	not reported	not reported	Mucinous adenocarcinoma	stage iib	--	alive	8480-03-01	--	--	--	not reported	Lower lobe, lung	--	not reported	not reported	Lower lobe, lung	2823	--	--	--
1d90c9f3-5025-4867-a2f0-e455b6a254fa	TCGA-97-7546	TCGA-LUAD	female	1932	white	not hispanic or latino	--	not reported	not reported	Acinar cell carcinoma	stage ia	27913	alive	8550-03-01	--	--	--	not reported	Upper lobe, lung	-27913	not reported	not reported	Upper lobe, lung	1285	--	--	--
42d208bd-cd77-4bfb-ad53-9fc072a87393	TCGA-53-7813	TCGA-LUAD	female	1957	white	not hispanic or latino	--	not reported	not reported	Bronchiolo-alveolar carcinoma, non-mucinous	stage iiib	18875	alive	8252-03-01	--	--	--	not reported	Upper lobe, lung	-18875	not reported	not reported	Upper lobe, lung	424	--	--	--
c0c879f7-c332-4d31-9f7e-a3bf361b36ee	TCGA-97-A4M1	TCGA-LUAD	female	1960	white	not hispanic or latino	--	not reported	not reported	Adenocarcinoma with mixed subtypes	stage ia	19272	alive	8255-03-01	--	--	--	not reported	Upper lobe, lung	-19272	not reported	not reported	Upper lobe, lung	601	--	--	--
f462cfef-f60a-4d3e-b92d-b8d8f50b6bb3	TCGA-69-7978	TCGA-LUAD	male	1952	white	not hispanic or latino	--	not reported	not reported	Adenocarcinoma with mixed subtypes	stage iib	21785	alive	8255-03-01	--	--	--	not reported	Upper lobe, lung	-21785	not reported	not reported	Upper lobe, lung	134	--	--	--
b40d0849-f4ef-4a14-9732-9beb708cb46b	TCGA-78-7166	TCGA-LUAD	male	1918	white	not reported	2002	not reported	not reported	Adenocarcinoma, NOS	stage iib	30869	dead	8140-03-01	258	--	--	not reported	Lower lobe, lung	-30869	not reported	not reported	Lower lobe, lung	--	--	--	--
5fd0f07b-8bb9-4378-bd26-28a26057e8fe	TCGA-55-8085	TCGA-LUAD	male	1947	white	not hispanic or latino	--	not reported	not reported	Papillary adenocarcinoma, NOS	stage ia	23596	alive	8260-03-01	--	--	--	not reported	Lower lobe, lung	-23596	not reported	not reported	Lower lobe, lung	904	--	--	--
cd9e70e4-8622-4a07-8646-63f8275c1737	TCGA-49-AARE	TCGA-LUAD	female	1948	black or african american	not hispanic or latino	2002	not reported	not reported	Adenocarcinoma, NOS	stage ia	18893	dead	8140-03-01	1229	--	--	not reported	Upper lobe, lung	-18893	not reported	not reported	Upper lobe, lung	--	--	--	--
100430c8-1446-45c8-af36-b6dbb3ddd0c1	TCGA-50-5935	TCGA-LUAD	female	1920	white	not hispanic or latino	2007	not reported	not reported	Adenocarcinoma, NOS	stage ia	31610	dead	8140-03-01	653	--	--	not reported	Upper lobe, lung	-31610	not reported	not reported	Upper lobe, lung	653	--	--	--
a0e57b39-960e-4e46-8aa0-d0ee2fd9a7cc	TCGA-78-7150	TCGA-LUAD	male	1943	white	not reported	2003	not reported	not reported	Adenocarcinoma, NOS	stage iib	21891	dead	8140-03-01	666	--	--	not reported	Lower lobe, lung	-21891	not reported	not reported	Lower lobe, lung	--	--	--	--
44d8c859-4b7a-4e9d-bffc-0de0e6afdcc4	TCGA-69-8253	TCGA-LUAD	female	1953	black or african american	not hispanic or latino	--	not reported	not reported	Adenocarcinoma with mixed subtypes	stage iia	21771	alive	8255-03-01	--	--	--	not reported	Lower lobe, lung	-21771	not reported	not reported	Lower lobe, lung	426	--	--	--
8609edfc-119d-4d63-9188-c86aabd5ca52	TCGA-86-8076	TCGA-LUAD	male	1969	white	not hispanic or latino	--	not reported	not reported	Papillary adenocarcinoma, NOS	stage ia	15605	alive	8260-03-01	--	--	--	not reported	Upper lobe, lung	-15605	not reported	not reported	Upper lobe, lung	993	--	--	--
3afa5045-a1ee-4a07-8aad-2e252b2f7d7a	TCGA-49-AAR0	TCGA-LUAD	male	1945	black or african american	not hispanic or latino	--	not reported	not reported	Adenocarcinoma, NOS	stage ia	20932	alive	8140-03-01	--	--	--	not reported	Upper lobe, lung	-20932	not reported	not reported	Upper lobe, lung	4765	--	--	--
8504fd86-a70a-4cba-9ec8-25c9e60ca549	TCGA-50-6594	TCGA-LUAD	female	1930	black or african american	not hispanic or latino	2010	not reported	not reported	Adenocarcinoma, NOS	stage iiia	28924	dead	8140-03-01	370	--	--	not reported	Upper lobe, lung	-28924	not reported	not reported	Upper lobe, lung	--	--	--	--
54254f5a-50e8-4150-a9b7-56a0470d2a56	TCGA-78-7143	TCGA-LUAD	female	1930	white	not reported	2005	not reported	not reported	Bronchiolo-alveolar carcinoma, non-mucinous	stage ib	22673	dead	8252-03-01	4961	--	--	not reported	Upper lobe, lung	-22673	not reported	not reported	Upper lobe, lung	--	--	--	--
12c07138-e3fa-418a-89e3-628da12bc99e	TCGA-55-A48Y	TCGA-LUAD	male	1943	white	not hispanic or latino	--	not reported	not reported	Adenocarcinoma, NOS	stage iia	25384	alive	8140-03-01	--	--	--	not reported	Lower lobe, lung	-25384	not reported	not reported	Lower lobe, lung	630	--	--	--
467d96d7-4a42-4116-8c32-0e4b34f96d8a	TCGA-86-8358	TCGA-LUAD	male	1968	white	not hispanic or latino	--	not reported	not reported	Adenocarcinoma, NOS	stage ib	16409	alive	8140-03-01	--	--	--	not reported	Upper lobe, lung	-16409	not reported	not reported	Upper lobe, lung	653	--	--	--
cd0dc947-b708-464e-beb7-954c9d4583e7	TCGA-73-4659	TCGA-LUAD	male	1940	white	not hispanic or latino	2007	not reported	not reported	Adenocarcinoma, NOS	stage iiia	24253	dead	8140-03-01	711	--	--	not reported	Lung, NOS	-24253	not reported	not reported	Lung, NOS	711	--	--	--
cc3d9750-7ce0-489f-86d4-8017b7ebed29	TCGA-50-5055	TCGA-LUAD	female	1929	white	not hispanic or latino	--	not reported	not reported	Adenocarcinoma with mixed subtypes	stage iia	28988	dead	8255-03-01	1830	--	--	not reported	Lower lobe, lung	-28988	not reported	not reported	Lower lobe, lung	785	--	--	--
cc4bd56a-25c5-4c48-b583-ac3aeb778ca6	TCGA-38-4628	TCGA-LUAD	female	1937	white	not hispanic or latino	2006	not reported	not reported	Adenocarcinoma, NOS	stage iib	24057	dead	8140-03-01	1492	--	--	not reported	Upper lobe, lung	-24057	not reported	not reported	Upper lobe, lung	--	--	--	--
d63c028b-b6d3-49ce-b63e-261eed3b86df	TCGA-55-8507	TCGA-LUAD	male	1959	white	not hispanic or latino	--	not reported	not reported	Adenocarcinoma, NOS	stage ia	19390	alive	8140-03-01	--	--	--	not reported	Upper lobe, lung	-19390	not reported	not reported	Upper lobe, lung	418	--	--	--
44adf4cb-2829-4153-80fd-a8b7ee0e654a	TCGA-35-4122	TCGA-LUAD	male	1941	white	not hispanic or latino	--	not reported	not reported	Adenocarcinoma, NOS	stage ia	25491	alive	8140-03-01	--	--	--	not reported	Upper lobe, lung	-25491	not reported	not reported	Upper lobe, lung	225	--	--	--
75589307-f141-4d0d-b35d-adbbc77b3dec	TCGA-55-8204	TCGA-LUAD	female	1924	white	not hispanic or latino	--	not reported	not reported	Adenocarcinoma, NOS	stage ib	31818	alive	8140-03-01	--	--	--	not reported	Upper lobe, lung	-31818	not reported	not reported	Upper lobe, lung	515	--	--	--
488646a1-0bdb-45f8-8c30-bef006924511	TCGA-75-7027	TCGA-LUAD	male	--	not reported	not reported	--	not reported	not reported	Adenocarcinoma, NOS	stage ib	--	alive	8140-03-01	--	--	--	not reported	Lower lobe, lung	--	not reported	not reported	Lower lobe, lung	3059	--	--	--
09918b81-4696-4cba-a45a-5fe7407c2337	TCGA-50-6592	TCGA-LUAD	female	1936	white	not hispanic or latino	2009	not reported	not reported	Adenocarcinoma, NOS	stage ib	26191	dead	8140-03-01	777	--	--	not reported	Lower lobe, lung	-26191	not reported	not reported	Lower lobe, lung	--	--	--	--
fe714ac0-f874-426a-924b-a2980232b5f7	TCGA-55-8616	TCGA-LUAD	female	1954	white	not hispanic or latino	--	not reported	not reported	Adenocarcinoma, NOS	stage ib	21225	alive	8140-03-01	--	--	--	not reported	Upper lobe, lung	-21225	not reported	not reported	Upper lobe, lung	48	--	--	--
2a394996-809f-459f-a647-d209921ccbd2	TCGA-73-A9RS	TCGA-LUAD	male	1972	black or african american	not hispanic or latino	--	not reported	not reported	Adenocarcinoma, NOS	stage iib	15162	dead	8140-03-01	340	--	--	not reported	Upper lobe, lung	-15162	not reported	not reported	Upper lobe, lung	305	--	--	--
7093024b-cf56-4783-b973-b72573ed7f2b	TCGA-93-A4JQ	TCGA-LUAD	male	1963	white	not hispanic or latino	--	not reported	not reported	Acinar cell carcinoma	stage ia	17951	alive	8550-03-01	--	--	--	not reported	Upper lobe, lung	-17951	not reported	not reported	Upper lobe, lung	526	--	--	--
98ef41fa-3015-445a-bbdc-984361c911f7	TCGA-49-AARN	TCGA-LUAD	female	1944	black or african american	not hispanic or latino	2003	not reported	not reported	Adenocarcinoma, NOS	stage ia	20605	dead	8140-03-01	1135	--	--	not reported	Lower lobe, lung	-20605	not reported	not reported	Lower lobe, lung	--	--	--	--
bf755bc2-b7aa-4c3c-8b3c-58b089b5cab6	TCGA-55-7907	TCGA-LUAD	male	1934	white	not hispanic or latino	--	not reported	not reported	Adenocarcinoma, NOS	stage iia	28201	dead	8140-03-01	343	--	--	not reported	Upper lobe, lung	-28201	not reported	not reported	Upper lobe, lung	16	--	--	--
7a0ea814-f0de-4bc4-a81a-daa000559369	TCGA-50-5933	TCGA-LUAD	male	1929	white	not hispanic or latino	2007	not reported	not reported	Adenocarcinoma, NOS	stage iiib	26377	dead	8140-03-01	2393	--	--	not reported	Lower lobe, lung	-26377	not reported	not reported	Lower lobe, lung	2370	--	--	--
532c1852-76dd-489f-9380-36766d6e3c34	TCGA-86-7714	TCGA-LUAD	female	1950	black or african american	not hispanic or latino	--	not reported	not reported	Adenocarcinoma with mixed subtypes	stage iiia	22619	dead	8255-03-01	625	--	--	not reported	Lower lobe, lung	-22619	not reported	not reported	Lower lobe, lung	0	--	--	--
591c068f-bbb1-4df2-9abb-d1a2e4a58372	TCGA-50-5068	TCGA-LUAD	female	1944	white	not hispanic or latino	2007	not reported	not reported	Adenocarcinoma, NOS	stage iib	21728	dead	8140-03-01	1499	--	--	not reported	Lower lobe, lung	-21728	not reported	not reported	Lower lobe, lung	1499	--	--	--
6dfd47d2-831a-4386-9051-f78199a16bb5	TCGA-05-4397	TCGA-LUAD	male	1941	not reported	not reported	2008	not reported	not reported	Adenocarcinoma with mixed subtypes	stage iib	23833	dead	8255-03-01	731	--	--	not reported	Middle lobe, lung	-23833	not reported	not reported	Middle lobe, lung	--	--	--	--
2079155a-d91d-4246-a038-01934a580f32	TCGA-38-4626	TCGA-LUAD	female	1946	white	not hispanic or latino	--	not reported	not reported	Adenocarcinoma, NOS	not reported	20903	alive	8140-03-01	--	--	--	not reported	Upper lobe, lung	-20903	not reported	not reported	Upper lobe, lung	3674	--	--	--
ce15f31f-2bad-4485-96fa-495bfa262e66	TCGA-05-4403	TCGA-LUAD	male	1930	not reported	not reported	--	not reported	not reported	Adenocarcinoma with mixed subtypes	stage ib	27881	alive	8255-03-01	--	--	--	not reported	Upper lobe, lung	-27881	not reported	not reported	Upper lobe, lung	578	--	--	--
37c8d73a-45ae-40fc-ba9a-721b755c1160	TCGA-97-7553	TCGA-LUAD	female	1949	white	not hispanic or latino	--	not reported	not reported	Bronchiolo-alveolar carcinoma, non-mucinous	stage ia	21518	alive	8252-03-01	--	--	--	not reported	Lower lobe, lung	-21518	not reported	not reported	Lower lobe, lung	1870	--	--	--
67a2bc21-7c87-4678-997d-a434de672436	TCGA-78-7537	TCGA-LUAD	male	1930	not reported	not reported	2006	not reported	not reported	Adenocarcinoma with mixed subtypes	stage ib	26610	dead	8255-03-01	1622	--	--	not reported	Upper lobe, lung	-26610	not reported	not reported	Upper lobe, lung	--	--	--	--
681b1176-9676-44d3-892c-1d5dba1ce25b	TCGA-75-7025	TCGA-LUAD	male	--	not reported	not reported	--	not reported	not reported	Adenocarcinoma, NOS	stage ib	--	alive	8140-03-01	--	--	--	not reported	Lower lobe, lung	--	not reported	not reported	Lower lobe, lung	3305	--	--	--
772324a5-5513-454d-ad6b-605798f69b73	TCGA-55-8619	TCGA-LUAD	female	1940	white	not hispanic or latino	--	not reported	not reported	Mucinous adenocarcinoma	stage iib	26616	alive	8480-03-01	--	--	--	not reported	Lower lobe, lung	-26616	not reported	not reported	Lower lobe, lung	416	--	--	--
0780eb43-d5b5-4c3d-9825-beacba5cc723	TCGA-49-4501	TCGA-LUAD	female	1929	white	not hispanic or latino	1999	not reported	not reported	Adenocarcinoma, NOS	stage ib	24817	dead	8140-03-01	1421	--	--	not reported	Upper lobe, lung	-24817	not reported	not reported	Upper lobe, lung	--	--	--	--
3a23cdb5-2327-45ac-b0b5-d4afe038c757	TCGA-05-4430	TCGA-LUAD	female	1949	not reported	not reported	--	not reported	not reported	Adenocarcinoma with mixed subtypes	stage ib	21884	alive	8255-03-01	--	--	--	not reported	Lower lobe, lung	-21884	not reported	not reported	Lower lobe, lung	761	--	--	--
69dba721-a168-47a4-b7ff-80a448bad654	TCGA-55-7914	TCGA-LUAD	female	1940	white	not hispanic or latino	--	not reported	not reported	Adenocarcinoma, NOS	stage iia	26105	dead	8140-03-01	187	--	--	not reported	Upper lobe, lung	-26105	not reported	not reported	Upper lobe, lung	3	--	--	--
a7911bdc-13f1-434a-bfa3-f8ba55d15846	TCGA-55-7574	TCGA-LUAD	female	1947	white	not hispanic or latino	--	not reported	not reported	Adenocarcinoma, NOS	stage ib	23703	dead	8140-03-01	995	--	--	not reported	Upper lobe, lung	-23703	not reported	not reported	Upper lobe, lung	95	--	--	--
9c894668-88f5-4308-a1c0-6b8acc6aaaec	TCGA-86-7711	TCGA-LUAD	male	1941	white	hispanic or latino	--	not reported	not reported	Adenocarcinoma, NOS	stage iia	25719	dead	8140-03-01	1046	--	--	not reported	Lower lobe, lung	-25719	not reported	not reported	Lower lobe, lung	630	--	--	--
482eb2a7-6fed-4e4c-b1b6-14d6d869f855	TCGA-86-8074	TCGA-LUAD	female	1949	white	not hispanic or latino	--	not reported	not reported	Papillary adenocarcinoma, NOS	stage iia	22862	alive	8260-03-01	--	--	--	not reported	Lower lobe, lung	-22862	not reported	not reported	Lower lobe, lung	24	--	--	--
6144d666-8f77-4efe-95f1-f9e5c4e5e056	TCGA-44-6145	TCGA-LUAD	female	1949	white	not hispanic or latino	--	not reported	not reported	Adenocarcinoma, NOS	stage ia	22745	alive	8140-03-01	--	--	--	not reported	Upper lobe, lung	-22745	not reported	not reported	Upper lobe, lung	595	--	--	--
0ea4920f-f4c8-4590-84b3-eb419824e144	TCGA-38-4625	TCGA-LUAD	female	1936	white	not hispanic or latino	--	not reported	not reported	Adenocarcinoma, NOS	stage ib	24241	alive	8140-03-01	--	--	--	not reported	Upper lobe, lung	-24241	not reported	not reported	Upper lobe, lung	2973	--	--	--
1427cd18-5ad3-491a-9981-908e31ae49db	TCGA-91-6829	TCGA-LUAD	male	1923	white	not hispanic or latino	2004	not reported	not reported	Bronchiolo-alveolar carcinoma, non-mucinous	stage ib	28841	dead	8252-03-01	1258	--	--	not reported	Lower lobe, lung	-28841	not reported	not reported	Lower lobe, lung	--	--	--	--
a391d49f-a822-460b-981c-6fbe1868ee38	TCGA-49-6743	TCGA-LUAD	female	1929	white	not reported	--	not reported	not reported	Clear cell adenocarcinoma, NOS	stage iiia	29807	alive	8310-03-01	--	--	--	not reported	Upper lobe, lung	-29807	not reported	not reported	Upper lobe, lung	1621	--	--	--
db0b9e63-4272-4f29-bf0e-1ec0fe79a9d7	TCGA-91-6831	TCGA-LUAD	male	1935	white	not hispanic or latino	--	not reported	not reported	Adenocarcinoma, NOS	stage ib	24436	alive	8140-03-01	--	--	--	not reported	Middle lobe, lung	-24436	not reported	not reported	Middle lobe, lung	310	--	--	--
383d1253-349f-43b3-bebd-9f1d1cf14b3d	TCGA-MP-A4TD	TCGA-LUAD	male	1937	white	not reported	2008	not reported	not reported	Adenocarcinoma, NOS	stage iiia	25983	dead	8140-03-01	307	--	--	not reported	Lower lobe, lung	-25983	not reported	not reported	Lower lobe, lung	--	--	--	--
62380447-3b94-4e7c-823a-72dd7b4ccf3a	TCGA-62-8399	TCGA-LUAD	male	1944	white	not hispanic or latino	--	not reported	not reported	Adenocarcinoma with mixed subtypes	stage iiia	22952	alive	8255-03-01	--	--	--	not reported	Upper lobe, lung	-22952	not reported	not reported	Upper lobe, lung	2696	--	--	--
6cf49cf0-de4c-4c90-8358-eae19c6206b0	TCGA-35-4123	TCGA-LUAD	male	1972	white	not hispanic or latino	--	not reported	not reported	Adenocarcinoma, NOS	stage ia	14064	alive	8140-03-01	--	--	--	not reported	Upper lobe, lung	-14064	not reported	not reported	Upper lobe, lung	182	--	--	--
0fe909ea-d52c-4b71-816f-57f62d4a5744	TCGA-86-8054	TCGA-LUAD	male	1950	white	not hispanic or latino	--	not reported	not reported	Acinar cell carcinoma	stage iib	22584	alive	8550-03-01	--	--	--	not reported	Upper lobe, lung	-22584	not reported	not reported	Upper lobe, lung	1148	--	--	--
2483621a-4db3-41ab-aa33-b9427ea8a0af	TCGA-38-4631	TCGA-LUAD	female	1925	white	not hispanic or latino	1997	not reported	not reported	Adenocarcinoma, NOS	stage ib	26538	dead	8140-03-01	354	--	--	not reported	Upper lobe, lung	-26538	not reported	not reported	Upper lobe, lung	--	--	--	--
12ccd581-a921-41bc-bcee-4e9be54532cc	TCGA-50-5931	TCGA-LUAD	female	1926	white	not hispanic or latino	2002	not reported	not reported	Adenocarcinoma, NOS	stage ib	27733	dead	8140-03-01	434	--	--	not reported	Upper lobe, lung	-27733	not reported	not reported	Upper lobe, lung	--	--	--	--
75dd635e-8e0c-4c0b-b21c-20f77770218d	TCGA-50-5942	TCGA-LUAD	female	1942	white	not hispanic or latino	--	not reported	not reported	Adenocarcinoma, NOS	stage ia	24781	alive	8140-03-01	--	--	--	not reported	Upper lobe, lung	-24781	not reported	not reported	Upper lobe, lung	1847	--	--	--
6845099a-b2c9-48d8-b856-9903d39bb92e	TCGA-55-8514	TCGA-LUAD	female	1942	black or african american	not hispanic or latino	--	not reported	not reported	Adenocarcinoma, NOS	stage ib	25608	alive	8140-03-01	--	--	--	not reported	Upper lobe, lung	-25608	not reported	not reported	Upper lobe, lung	520	--	--	--
1575148b-0f63-44ee-86fd-93ae1a02be0b	TCGA-50-5072	TCGA-LUAD	male	1935	white	not hispanic or latino	--	not reported	not reported	Adenocarcinoma, NOS	stage iiia	27036	dead	8140-03-01	250	--	--	not reported	Upper lobe, lung	-27036	not reported	not reported	Upper lobe, lung	246	--	--	--
9dda72ec-1698-44e2-b35c-11e9a2704380	TCGA-93-A4JN	TCGA-LUAD	male	1941	white	not hispanic or latino	--	not reported	not reported	Acinar cell carcinoma	stage iv	26273	alive	8550-03-01	--	--	--	not reported	Upper lobe, lung	-26273	not reported	not reported	Upper lobe, lung	718	--	--	--
78a24c56-576c-4245-bb42-6603b3d19897	TCGA-05-4427	TCGA-LUAD	female	1943	not reported	not reported	--	not reported	not reported	Adenocarcinoma with mixed subtypes	stage iib	23893	alive	8255-03-01	--	--	--	not reported	Upper lobe, lung	-23893	not reported	not reported	Upper lobe, lung	791	--	--	--
3b89ac82-63f6-41b9-a03d-34b9ffc1550d	TCGA-L9-A443	TCGA-LUAD	female	1949	white	not hispanic or latino	--	not reported	not reported	Adenocarcinoma, NOS	stage ia	23062	dead	8140-03-01	193	--	--	not reported	Lower lobe, lung	-23062	not reported	not reported	Lower lobe, lung	116	--	--	--
646910ee-5f5d-40ac-a21a-75790f89430a	TCGA-86-A4P8	TCGA-LUAD	female	1953	white	not hispanic or latino	--	not reported	not reported	Adenocarcinoma, NOS	stage iiia	21738	alive	8140-03-01	--	--	--	not reported	Lower lobe, lung	-21738	not reported	not reported	Lower lobe, lung	805	--	--	--
41c4c704-825e-49f5-9d54-dbd7d30725e0	TCGA-64-5781	TCGA-LUAD	female	1952	white	not hispanic or latino	--	not reported	not reported	Adenocarcinoma with mixed subtypes	stage ib	20219	alive	8255-03-01	--	--	--	not reported	Upper lobe, lung	-20219	not reported	not reported	Upper lobe, lung	1559	--	--	--
a534b96b-1665-444a-9308-e610f2f0e510	TCGA-44-7660	TCGA-LUAD	male	1939	white	not hispanic or latino	--	not reported	not reported	Adenocarcinoma, NOS	stage ib	26594	alive	8140-03-01	--	--	--	not reported	Upper lobe, lung	-26594	not reported	not reported	Upper lobe, lung	592	--	--	--
1d276b62-5e64-48fb-b2ce-5192b511fe37	TCGA-75-5146	TCGA-LUAD	male	--	not reported	not reported	--	not reported	not reported	Bronchiolo-alveolar carcinoma, non-mucinous	stage ib	--	alive	8252-03-01	--	--	--	not reported	Lower lobe, lung	--	not reported	not reported	Lower lobe, lung	2368	--	--	--
fc79086c-af9a-4c27-b074-f7050b6f3381	TCGA-78-7155	TCGA-LUAD	male	1937	white	not reported	2008	not reported	not reported	Adenocarcinoma, NOS	stage ib	24863	dead	8140-03-01	1171	--	--	not reported	Upper lobe, lung	-24863	not reported	not reported	Upper lobe, lung	--	--	--	--
a244a99a-d7cc-4fb1-bc76-b66886481621	TCGA-05-4417	TCGA-LUAD	female	1957	not reported	not reported	--	not reported	not reported	Adenocarcinoma with mixed subtypes	stage ib	18780	alive	8255-03-01	--	--	--	not reported	Upper lobe, lung	-18780	not reported	not reported	Upper lobe, lung	455	--	--	--
3b21b982-dba2-45f4-ad8d-21dc86fcaaa7	TCGA-55-A57B	TCGA-LUAD	female	1932	black or african american	not hispanic or latino	--	not reported	not reported	Adenocarcinoma with mixed subtypes	stage ia	29452	alive	8255-03-01	--	--	--	not reported	Upper lobe, lung	-29452	not reported	not reported	Upper lobe, lung	546	--	--	--
b8475929-2d9d-4909-bd62-59684a140bd7	TCGA-05-4390	TCGA-LUAD	female	1947	not reported	not reported	--	not reported	not reported	Adenocarcinoma with mixed subtypes	stage ib	21430	alive	8255-03-01	--	--	--	not reported	Upper lobe, lung	-21430	not reported	not reported	Upper lobe, lung	1126	--	--	--
abd6647b-d2eb-404d-8283-443e92addf55	TCGA-55-7995	TCGA-LUAD	female	1939	white	not hispanic or latino	--	not reported	not reported	Adenocarcinoma, NOS	stage ia	26837	alive	8140-03-01	--	--	--	not reported	Upper lobe, lung	-26837	not reported	not reported	Upper lobe, lung	889	--	--	--
ac0d7a82-82cb-4aec-b859-e37375f3de8b	TCGA-97-8547	TCGA-LUAD	female	1934	not reported	not reported	--	not reported	not reported	Acinar cell carcinoma	stage iiia	28801	alive	8550-03-01	--	--	--	not reported	Lower lobe, lung	-28801	not reported	not reported	Lower lobe, lung	657	--	--	--
a5f2576a-d628-47de-a5df-76a4f3105dcc	TCGA-L9-A743	TCGA-LUAD	male	1957	black or african american	not hispanic or latino	--	not reported	not reported	Adenocarcinoma, NOS	stage iia	20780	alive	8140-03-01	--	--	--	not reported	Upper lobe, lung	-20780	not reported	not reported	Upper lobe, lung	664	--	--	--
9a63f744-4ed4-4b4d-aac6-f9bda66aa563	TCGA-75-6205	TCGA-LUAD	female	--	not reported	not reported	--	not reported	not reported	Adenocarcinoma, NOS	stage ib	--	dead	8140-03-01	--	--	--	not reported	Upper lobe, lung	--	not reported	not reported	Upper lobe, lung	--	--	--	--
1fc81cd4-fa89-4135-8c3c-027ffae82b05	TCGA-44-5644	TCGA-LUAD	female	1959	white	not hispanic or latino	--	not reported	not reported	Adenocarcinoma, NOS	stage ib	18644	alive	8140-03-01	--	--	--	not reported	Lower lobe, lung	-18644	not reported	not reported	Lower lobe, lung	863	--	--	--
e6e75590-9520-4b1c-8a28-4a1d2b2218fc	TCGA-97-7938	TCGA-LUAD	female	1935	white	not hispanic or latino	2011	not reported	not reported	Bronchiolo-alveolar carcinoma, non-mucinous	stage ia	27980	dead	8252-03-01	18	--	--	not reported	Upper lobe, lung	-27980	not reported	not reported	Upper lobe, lung	--	--	--	--
dcd066ba-5894-453e-b1da-82092858c3db	TCGA-86-6562	TCGA-LUAD	male	1959	white	not hispanic or latino	--	not reported	not reported	Adenocarcinoma, NOS	stage iia	19301	dead	8140-03-01	376	--	--	not reported	Upper lobe, lung	-19301	not reported	not reported	Upper lobe, lung	0	--	--	--
294cb595-0907-44c7-bbef-985a27c1e6e2	TCGA-55-7724	TCGA-LUAD	female	1935	white	not hispanic or latino	--	not reported	not reported	Adenocarcinoma, NOS	stage ib	27891	alive	8140-03-01	--	--	--	not reported	Upper lobe, lung	-27891	not reported	not reported	Upper lobe, lung	705	--	--	--
c0e263eb-1a83-4dc8-8abe-3dd2a59bae1b	TCGA-86-8672	TCGA-LUAD	male	1953	white	not hispanic or latino	--	not reported	not reported	Adenocarcinoma, NOS	stage iib	21682	dead	8140-03-01	19	--	--	not reported	Upper lobe, lung	-21682	not reported	not reported	Upper lobe, lung	15	--	--	--
30f276a8-3a4b-4de8-aea0-7f605d100401	TCGA-93-A4JP	TCGA-LUAD	male	1948	asian	not hispanic or latino	--	not reported	not reported	Papillary adenocarcinoma, NOS	stage iv	23620	alive	8260-03-01	--	--	--	not reported	Lower lobe, lung	-23620	not reported	not reported	Lower lobe, lung	578	--	--	--
96d93e23-bb0d-46a8-9685-5ed0d6b83059	TCGA-99-7458	TCGA-LUAD	female	1936	white	not hispanic or latino	--	not reported	not reported	Bronchiolo-alveolar carcinoma, non-mucinous	stage iiia	27359	alive	8252-03-01	--	--	--	not reported	Lower lobe, lung	-27359	not reported	not reported	Lower lobe, lung	747	--	--	--
9cfc1519-33e7-4145-a4ad-78b5c449853a	TCGA-50-8459	TCGA-LUAD	male	1944	white	not hispanic or latino	--	not reported	not reported	Mucinous adenocarcinoma	stage iib	24859	alive	8480-03-01	--	--	--	not reported	Lower lobe, lung	-24859	not reported	not reported	Lower lobe, lung	1119	--	--	--
32a7b827-c3f9-4607-ae63-dae8caa2bc97	TCGA-L4-A4E5	TCGA-LUAD	female	1964	white	not hispanic or latino	--	not reported	not reported	Adenocarcinoma, NOS	stage i	17680	alive	8140-03-01	--	--	--	not reported	Upper lobe, lung	-17680	not reported	not reported	Upper lobe, lung	578	--	--	--
c6d78e27-e510-4f57-abae-19efa6105a8d	TCGA-49-4494	TCGA-LUAD	male	1918	white	not hispanic or latino	1997	not reported	not reported	Adenocarcinoma, NOS	stage iiia	28387	dead	8140-03-01	1081	--	--	not reported	Upper lobe, lung	-28387	not reported	not reported	Upper lobe, lung	--	--	--	--
aea68827-dc0f-484d-a00d-06deeaa4b3ce	TCGA-05-4433	TCGA-LUAD	male	1926	not reported	not reported	--	not reported	not reported	Adenocarcinoma with mixed subtypes	stage ib	30194	alive	8255-03-01	--	--	--	not reported	Lower lobe, lung	-30194	not reported	not reported	Lower lobe, lung	730	--	--	--
1b31cdb3-1837-49d6-a857-1830f8800299	TCGA-69-7763	TCGA-LUAD	male	1941	white	not hispanic or latino	--	not reported	not reported	Adenocarcinoma with mixed subtypes	stage ia	25316	alive	8255-03-01	--	--	--	not reported	Middle lobe, lung	-25316	not reported	not reported	Middle lobe, lung	690	--	--	--
9f4f2ff3-3c02-4281-a398-b0d0955e58eb	TCGA-69-8453	TCGA-LUAD	male	1935	white	not hispanic or latino	--	not reported	not reported	Mucinous adenocarcinoma	stage iib	28413	alive	8480-03-01	--	--	--	not reported	Lower lobe, lung	-28413	not reported	not reported	Lower lobe, lung	788	--	--	--
17e09b0d-eab2-40ec-ae3c-be9ab63fcef0	TCGA-MN-A4N5	TCGA-LUAD	male	1948	white	not hispanic or latino	--	not reported	not reported	Adenocarcinoma, NOS	stage ia	23257	alive	8140-03-01	--	--	--	not reported	Upper lobe, lung	-23257	not reported	not reported	Upper lobe, lung	84	--	--	--
2b68b51f-bd4c-4bbb-b4e6-2eead53da2a4	TCGA-J2-8194	TCGA-LUAD	female	1942	white	not hispanic or latino	--	not reported	not reported	Adenocarcinoma with mixed subtypes	stage iib	25441	alive	8255-03-01	--	--	--	not reported	Lower lobe, lung	-25441	not reported	not reported	Lower lobe, lung	724	--	--	--
70081320-540f-41d2-8687-ee6d011f8eb0	TCGA-MP-A4T9	TCGA-LUAD	female	1952	white	not hispanic or latino	2009	not reported	not reported	Adenocarcinoma, NOS	stage iiia	19767	dead	8140-03-01	1265	--	--	not reported	Upper lobe, lung	-19767	not reported	not reported	Upper lobe, lung	--	--	--	--
e1c55bac-bb41-4964-add5-ecd6ba04b58d	TCGA-50-5051	TCGA-LUAD	female	1965	white	not hispanic or latino	--	not reported	not reported	Adenocarcinoma, NOS	stage iiia	15585	dead	8140-03-01	478	--	--	not reported	Upper lobe, lung	-15585	not reported	not reported	Upper lobe, lung	455	--	--	--
77c4dbb2-eceb-4e0d-bcde-63dc817d5f35	TCGA-55-7903	TCGA-LUAD	male	1947	white	not hispanic or latino	--	not reported	not reported	Adenocarcinoma, NOS	stage ia	23509	alive	8140-03-01	--	--	--	not reported	Lower lobe, lung	-23509	not reported	not reported	Lower lobe, lung	567	--	--	--
0b15fcb8-1fb7-497e-80b9-d3db66a3c0a2	TCGA-55-7284	TCGA-LUAD	male	1937	white	not hispanic or latino	--	not reported	not reported	Bronchiolo-alveolar carcinoma, non-mucinous	stage iib	27087	dead	8252-03-01	243	--	--	not reported	Overlapping lesion of lung	-27087	not reported	not reported	Overlapping lesion of lung	121	--	--	--
77f8c850-b4e6-46a1-ab12-a50e0044a0c8	TCGA-55-8208	TCGA-LUAD	female	1939	white	not hispanic or latino	--	not reported	not reported	Adenocarcinoma, NOS	stage ia	26716	alive	8140-03-01	--	--	--	not reported	Upper lobe, lung	-26716	not reported	not reported	Upper lobe, lung	674	--	--	--
3c4ff061-d214-4d1c-8d2e-3034f207c252	TCGA-44-6775	TCGA-LUAD	female	1939	white	hispanic or latino	--	not reported	not reported	Adenocarcinoma, NOS	stage ib	26415	alive	8140-03-01	--	--	--	not reported	Upper lobe, lung	-26415	not reported	not reported	Upper lobe, lung	705	--	--	--
cc68632c-b1e3-491b-b562-9468e2d1c101	TCGA-86-7713	TCGA-LUAD	male	1941	white	not hispanic or latino	--	not reported	not reported	Adenocarcinoma, NOS	stage iia	25791	alive	8140-03-01	--	--	--	not reported	Middle lobe, lung	-25791	not reported	not reported	Middle lobe, lung	1157	--	--	--
9a2a226e-9605-4214-9320-469305e664e6	TCGA-49-AARQ	TCGA-LUAD	female	1955	black or african american	not hispanic or latino	--	not reported	not reported	Adenocarcinoma, NOS	stage i	15065	alive	8140-03-01	--	--	--	not reported	Upper lobe, lung	-15065	not reported	not reported	Upper lobe, lung	6732	--	--	--
e737f650-b72d-44e7-b750-558a56716803	TCGA-05-4432	TCGA-LUAD	male	1942	not reported	not reported	--	not reported	not reported	Adenocarcinoma with mixed subtypes	stage iib	24350	alive	8255-03-01	--	--	--	not reported	Upper lobe, lung	-24350	not reported	not reported	Upper lobe, lung	761	--	--	--
1070ff27-17c9-43dd-a4f6-daa643eb9123	TCGA-55-8089	TCGA-LUAD	male	1955	white	not hispanic or latino	--	not reported	not reported	Adenocarcinoma, NOS	stage ia	20576	dead	8140-03-01	702	--	--	not reported	Upper lobe, lung	-20576	not reported	not reported	Upper lobe, lung	100	--	--	--
7c7d777b-bf00-4c24-97fc-922580d5605f	TCGA-NJ-A55R	TCGA-LUAD	male	1944	white	not hispanic or latino	--	not reported	not reported	Solid carcinoma, NOS	stage ia	24738	alive	8230-03-01	--	--	--	not reported	Upper lobe, lung	-24738	not reported	not reported	Upper lobe, lung	603	--	--	--
ef42ae4c-a108-468e-beed-437cf3cf2962	TCGA-50-5936	TCGA-LUAD	male	1949	white	not hispanic or latino	2007	not reported	not reported	Mucinous adenocarcinoma	stage iiia	21238	dead	8480-03-01	257	--	--	not reported	Lower lobe, lung	-21238	not reported	not reported	Lower lobe, lung	--	--	--	--
3bd6badb-27ff-4d8d-b206-4d28dc264862	TCGA-44-3396	TCGA-LUAD	female	1935	white	not hispanic or latino	--	not reported	not reported	Adenocarcinoma, NOS	stage iiia	27073	alive	8140-03-01	--	--	--	not reported	Upper lobe, lung	-27073	not reported	not reported	Upper lobe, lung	1130	--	--	--
50b2c647-aecd-4c81-af22-0d8116593552	TCGA-49-4507	TCGA-LUAD	female	1924	white	not hispanic or latino	1997	not reported	not reported	Adenocarcinoma, NOS	stage iiia	26851	dead	8140-03-01	268	--	--	not reported	Main bronchus	-26851	not reported	not reported	Main bronchus	--	--	--	--
12b79b4f-c28c-418e-a1e7-e622f33fdcc2	TCGA-50-5939	TCGA-LUAD	male	1923	white	not hispanic or latino	2009	not reported	not reported	Adenocarcinoma with mixed subtypes	stage ib	31236	dead	8255-03-01	460	--	--	not reported	Upper lobe, lung	-31236	not reported	not reported	Upper lobe, lung	--	--	--	--
e7d30bc2-42e8-49c5-a5b3-9f58411b007a	TCGA-78-7147	TCGA-LUAD	female	1934	white	not reported	2002	not reported	not reported	Adenocarcinoma, NOS	stage iib	24809	dead	8140-03-01	586	--	--	not reported	Upper lobe, lung	-24809	not reported	not reported	Upper lobe, lung	--	--	--	--
8869000d-09d7-465a-ac32-54d1935c43e7	TCGA-86-8075	TCGA-LUAD	female	1945	white	not hispanic or latino	--	not reported	not reported	Adenocarcinoma, NOS	stage ib	24402	dead	8140-03-01	694	--	--	not reported	Upper lobe, lung	-24402	not reported	not reported	Upper lobe, lung	479	--	--	--
9b38eded-3f46-4aaa-9991-68008d97bdbe	TCGA-44-7670	TCGA-LUAD	female	1963	white	hispanic or latino	--	not reported	not reported	Adenocarcinoma, NOS	stage iia	17392	alive	8140-03-01	--	--	--	not reported	Upper lobe, lung	-17392	not reported	not reported	Upper lobe, lung	882	--	--	--
4d51ee44-e6f4-4bcb-be28-e9df54b39a8d	TCGA-55-8090	TCGA-LUAD	male	1931	white	not hispanic or latino	--	not reported	not reported	Adenocarcinoma, NOS	stage ia	29235	dead	8140-03-01	598	--	--	not reported	Lower lobe, lung	-29235	not reported	not reported	Lower lobe, lung	6	--	--	--
9944f46f-9fa8-4e2c-a806-776bec7f8803	TCGA-50-5049	TCGA-LUAD	male	1936	white	not hispanic or latino	--	not reported	not reported	Adenocarcinoma, NOS	stage ia	25577	alive	8140-03-01	--	--	--	not reported	Upper lobe, lung	-25577	not reported	not reported	Upper lobe, lung	3094	--	--	--
37884d39-64e8-4242-b6bd-4c0a1daa21cd	TCGA-71-8520	TCGA-LUAD	female	1951	asian	not hispanic or latino	--	not reported	not reported	Adenocarcinoma, NOS	stage ib	21921	dead	8140-03-01	210	--	--	not reported	Upper lobe, lung	-21921	not reported	not reported	Upper lobe, lung	3	--	--	--
8d535aa6-6d59-4965-b5ed-17217d8f5930	TCGA-55-8621	TCGA-LUAD	female	1937	white	not hispanic or latino	--	not reported	not reported	Adenocarcinoma, NOS	stage ia	27485	alive	8140-03-01	--	--	--	not reported	Lower lobe, lung	-27485	not reported	not reported	Lower lobe, lung	515	--	--	--
ae702159-5b6a-41dd-868c-7540f9e1131c	TCGA-95-7039	TCGA-LUAD	female	1957	white	not hispanic or latino	--	not reported	not reported	Adenocarcinoma, NOS	stage iib	19981	alive	8140-03-01	--	--	--	not reported	Upper lobe, lung	-19981	not reported	not reported	Upper lobe, lung	1272	--	--	--
b2bc53d6-ef78-4ae9-a6b5-1c7cad9a43eb	TCGA-55-7910	TCGA-LUAD	female	1961	black or african american	not hispanic or latino	--	not reported	not reported	Adenocarcinoma, NOS	stage iia	18289	alive	8140-03-01	--	--	--	not reported	Lower lobe, lung	-18289	not reported	not reported	Lower lobe, lung	1040	--	--	--
4b7cd595-e7f9-45a8-b736-a8c7c42d9539	TCGA-71-6725	TCGA-LUAD	female	1963	asian	not hispanic or latino	--	not reported	not reported	Papillary adenocarcinoma, NOS	stage ib	17793	alive	8260-03-01	--	--	--	not reported	Upper lobe, lung	-17793	not reported	not reported	Upper lobe, lung	256	--	--	--
b36b7567-30d3-4d0c-84c4-b203986e0fdb	TCGA-55-8301	TCGA-LUAD	male	1954	white	not hispanic or latino	--	not reported	not reported	Adenocarcinoma, NOS	stage ib	21535	alive	8140-03-01	--	--	--	not reported	Lower lobe, lung	-21535	not reported	not reported	Lower lobe, lung	534	--	--	--
4e7b2af4-b158-41a7-be22-bea227a759e6	TCGA-55-7227	TCGA-LUAD	male	1934	white	not hispanic or latino	--	not reported	not reported	Adenocarcinoma, NOS	stage iiia	28458	dead	8140-03-01	952	--	--	not reported	Lower lobe, lung	-28458	not reported	not reported	Lower lobe, lung	53	--	--	--
83e38dbd-edab-47f2-b19f-6ea38fc6bece	TCGA-44-8120	TCGA-LUAD	male	1953	black or african american	not hispanic or latino	--	not reported	not reported	Adenocarcinoma, NOS	stage ib	21188	alive	8140-03-01	--	--	--	not reported	Upper lobe, lung	-21188	not reported	not reported	Upper lobe, lung	260	--	--	--
1f0a5312-0590-4230-9da9-fd0cfe693586	TCGA-55-7911	TCGA-LUAD	female	1941	white	not hispanic or latino	--	not reported	not reported	Adenocarcinoma, NOS	stage ia	25746	alive	8140-03-01	--	--	--	not reported	Middle lobe, lung	-25746	not reported	not reported	Middle lobe, lung	537	--	--	--
82476d2d-e403-4f6b-8dd6-cc84e3329478	TCGA-50-6595	TCGA-LUAD	female	1935	white	not hispanic or latino	2009	not reported	not reported	Adenocarcinoma, NOS	stage iiia	27197	dead	8140-03-01	189	--	--	not reported	Upper lobe, lung	-27197	not reported	not reported	Upper lobe, lung	--	--	--	--
4d153600-81f9-44fb-b485-6355ec306d6a	TCGA-78-7159	TCGA-LUAD	female	1948	white	not reported	--	not reported	not reported	Adenocarcinoma with mixed subtypes	stage ia	22261	alive	8255-03-01	--	--	--	not reported	Upper lobe, lung	-22261	not reported	not reported	Upper lobe, lung	1974	--	--	--
9ca1a26c-82e0-48b3-b3bb-2ed57086eeb1	TCGA-97-8552	TCGA-LUAD	female	1957	white	not hispanic or latino	--	not reported	not reported	Bronchiolo-alveolar carcinoma, non-mucinous	stage i	20331	alive	8252-03-01	--	--	--	not reported	Lower lobe, lung	-20331	not reported	not reported	Lower lobe, lung	626	--	--	--
bcf2e591-9dae-440f-bd03-5f27c57db741	TCGA-69-7765	TCGA-LUAD	male	1955	black or african american	not hispanic or latino	--	not reported	not reported	Adenocarcinoma with mixed subtypes	not reported	20625	alive	8255-03-01	--	--	--	not reported	Upper lobe, lung	-20625	not reported	not reported	Upper lobe, lung	165	--	--	--
69b23036-add9-42c9-941f-02fb74d9b08c	TCGA-05-4425	TCGA-LUAD	female	1938	not reported	not reported	--	not reported	not reported	Adenocarcinoma with mixed subtypes	stage iv	25902	alive	8255-03-01	--	--	--	not reported	Middle lobe, lung	-25902	not reported	not reported	Middle lobe, lung	669	--	--	--
ba49117e-dab6-4e7d-bc44-f11dcafa1318	TCGA-55-7727	TCGA-LUAD	male	1941	white	not hispanic or latino	--	not reported	not reported	Adenocarcinoma, NOS	stage iiia	25929	alive	8140-03-01	--	--	--	not reported	Upper lobe, lung	-25929	not reported	not reported	Upper lobe, lung	119	--	--	--
15f12d2c-b834-4bfc-b526-f03bf85bfe96	TCGA-MP-A4SW	TCGA-LUAD	male	1949	white	not reported	2006	not reported	not reported	Adenocarcinoma, NOS	stage iib	19640	dead	8140-03-01	1778	--	--	not reported	Upper lobe, lung	-19640	not reported	not reported	Upper lobe, lung	--	--	--	--
673493f6-975c-49e8-934c-001e9a0fff90	TCGA-67-3772	TCGA-LUAD	female	1927	white	not hispanic or latino	--	not reported	not reported	Adenocarcinoma, NOS	stage ib	29989	alive	8140-03-01	--	--	--	not reported	Upper lobe, lung	-29989	not reported	not reported	Upper lobe, lung	573	--	--	--
bd4e9a9f-17f3-4d33-92fc-fcc45dd0e7b4	TCGA-49-4487	TCGA-LUAD	female	1920	white	not hispanic or latino	1994	not reported	not reported	Adenocarcinoma, NOS	stage ia	26583	dead	8140-03-01	855	--	--	not reported	Upper lobe, lung	-26583	not reported	not reported	Upper lobe, lung	--	--	--	--
bbe88801-34f3-46d2-bbfd-b46c3901ed71	TCGA-93-8067	TCGA-LUAD	male	1934	asian	not hispanic or latino	--	not reported	not reported	Adenocarcinoma, NOS	stage ib	28453	alive	8140-03-01	--	--	--	not reported	Lower lobe, lung	-28453	not reported	not reported	Lower lobe, lung	186	--	--	--
cd902d08-215e-4bd0-88e4-4fd01ab43cbf	TCGA-86-8073	TCGA-LUAD	male	1953	white	not hispanic or latino	--	not reported	not reported	Bronchiolo-alveolar adenocarcinoma, NOS	stage ib	21214	alive	8250-03-01	--	--	--	not reported	Upper lobe, lung	-21214	not reported	not reported	Upper lobe, lung	740	--	--	--
5ace9608-d38a-42f2-a877-ec7c9d211808	TCGA-78-8648	TCGA-LUAD	female	1944	not reported	not reported	2005	not reported	not reported	Adenocarcinoma, NOS	stage iib	21443	dead	8140-03-01	1209	--	--	not reported	Upper lobe, lung	-21443	not reported	not reported	Upper lobe, lung	--	--	--	--
cbf1f718-6bb7-4daf-b9d6-fb294281decb	TCGA-97-8172	TCGA-LUAD	female	1936	white	not hispanic or latino	--	not reported	not reported	Acinar cell carcinoma	stage ib	27416	alive	8550-03-01	--	--	--	not reported	Upper lobe, lung	-27416	not reported	not reported	Upper lobe, lung	545	--	--	--
7eb540b4-8dd3-4382-a488-e48b1c7213b3	TCGA-50-7109	TCGA-LUAD	male	1951	white	not hispanic or latino	--	not reported	not reported	Adenocarcinoma, NOS	stage ia	21979	dead	8140-03-01	308	--	--	not reported	Lower lobe, lung	-21979	not reported	not reported	Lower lobe, lung	255	--	--	--
39ab7174-5707-498d-9959-523680e04198	TCGA-55-A492	TCGA-LUAD	female	1942	white	not hispanic or latino	--	not reported	not reported	Adenocarcinoma, NOS	stage ia	25719	alive	8140-03-01	--	--	--	not reported	Upper lobe, lung	-25719	not reported	not reported	Upper lobe, lung	596	--	--	--
3e34c7d9-90fa-41e2-ba6b-4bbc332adc4e	TCGA-55-A4DG	TCGA-LUAD	male	1941	white	not hispanic or latino	--	not reported	not reported	Adenocarcinoma, NOS	stage ia	26044	alive	8140-03-01	--	--	--	not reported	Upper lobe, lung	-26044	not reported	not reported	Upper lobe, lung	608	--	--	--
4efc2dac-6330-4b7a-a529-a27285f5fc23	TCGA-75-7031	TCGA-LUAD	female	--	not reported	not reported	--	not reported	not reported	Adenocarcinoma, NOS	stage ib	--	alive	8140-03-01	--	--	--	not reported	Upper lobe, lung	--	not reported	not reported	Upper lobe, lung	--	--	--	--
d288b69f-1e79-4429-8646-9994b7c54f8f	TCGA-78-7154	TCGA-LUAD	male	1931	white	not reported	2004	not reported	not reported	Adenocarcinoma, NOS	stage iiia	26481	dead	8140-03-01	593	--	--	not reported	Upper lobe, lung	-26481	not reported	not reported	Upper lobe, lung	--	--	--	--
f4350d9c-3f40-4829-bbc4-8acb2f3ff512	TCGA-97-8175	TCGA-LUAD	female	1956	white	not hispanic or latino	--	not reported	not reported	Solid carcinoma, NOS	stage ib	20206	alive	8230-03-01	--	--	--	not reported	Upper lobe, lung	-20206	not reported	not reported	Upper lobe, lung	551	--	--	--
32592562-11fa-435a-b40b-2b242bae53aa	TCGA-75-6214	TCGA-LUAD	female	--	not reported	not reported	--	not reported	not reported	Adenocarcinoma, NOS	stage iiia	--	dead	8140-03-01	1115	--	--	not reported	Upper lobe, lung	--	not reported	not reported	Upper lobe, lung	--	--	--	--
67fa3e41-c7c6-44c5-9e67-6bcb2715aacc	TCGA-69-A59K	TCGA-LUAD	female	1952	black or african american	not hispanic or latino	--	not reported	not reported	Adenocarcinoma with mixed subtypes	stage iib	22093	alive	8255-03-01	--	--	--	not reported	Upper lobe, lung	-22093	not reported	not reported	Upper lobe, lung	522	--	--	--
9b93a7c5-f9b4-4461-8078-0201a725c9cf	TCGA-49-AARR	TCGA-LUAD	male	1933	black or african american	not hispanic or latino	--	not reported	not reported	Adenocarcinoma, NOS	stage ia	24942	alive	8140-03-01	--	--	--	not reported	Upper lobe, lung	-24942	not reported	not reported	Upper lobe, lung	4992	--	--	--
3d2aa654-1b5f-4eb4-a1c2-af31f5760069	TCGA-05-4420	TCGA-LUAD	male	1967	not reported	not reported	--	not reported	not reported	Adenocarcinoma with mixed subtypes	stage ib	15159	alive	8255-03-01	--	--	--	not reported	Lower lobe, lung	-15159	not reported	not reported	Lower lobe, lung	912	--	--	--
f59e5a76-f803-470b-910c-a897a149d939	TCGA-55-8505	TCGA-LUAD	male	1950	white	not hispanic or latino	--	not reported	not reported	Adenocarcinoma, NOS	stage iiia	22676	alive	8140-03-01	--	--	--	not reported	Lower lobe, lung	-22676	not reported	not reported	Lower lobe, lung	440	--	--	--
2f0710f4-827b-45b2-9b7e-c27385b481a7	TCGA-55-6980	TCGA-LUAD	male	1950	white	not reported	--	not reported	not reported	Bronchiolo-alveolar carcinoma, non-mucinous	stage ia	--	alive	8252-03-01	--	--	--	not reported	Lower lobe, lung	--	not reported	not reported	Lower lobe, lung	2109	--	--	--
97831d28-ab41-4c18-bfc2-c4c6bc757d13	TCGA-91-6847	TCGA-LUAD	female	1940	white	not hispanic or latino	--	not reported	not reported	Adenocarcinoma, NOS	stage ib	22862	alive	8140-03-01	--	--	--	not reported	Lower lobe, lung	-22862	not reported	not reported	Lower lobe, lung	842	--	--	--
26a92e1b-08d8-45cd-af0c-eaf2514808a2	TCGA-L4-A4E6	TCGA-LUAD	male	1945	white	not hispanic or latino	--	not reported	not reported	Adenocarcinoma, NOS	stage ia	24631	alive	8140-03-01	--	--	--	not reported	Upper lobe, lung	-24631	not reported	not reported	Upper lobe, lung	435	--	--	--
16d3c1c1-cf3a-44b6-b564-8ae5464b243d	TCGA-55-A48Z	TCGA-LUAD	female	1952	white	not hispanic or latino	--	not reported	not reported	Adenocarcinoma with mixed subtypes	stage iiib	22056	alive	8255-03-01	--	--	--	not reported	Upper lobe, lung	-22056	not reported	not reported	Upper lobe, lung	651	--	--	--
